# Supplementary material for: Identification of Key Genes during Ethylene-Induced Adventitious Root Development in Cucumber (Cucumis sativus L.)
Source: MDPI journal article supplement (doi:10.3390/ijms232112981), 2022-10-26
Supplement: s1 [file s1]

**Supplementary Table S10.** Expression patterns of DEGs related to plant hormone transduction during adventitious root development in cucumber.

| Gene id   | Gene name           | FPKM(the control) | FPKM(ETH)   | log2FC       | Gene description                                 | Up/down |
|-----------|---------------------|-------------------|-------------|--------------|--------------------------------------------------|---------|
| 101205750 | <i>LOC101205750</i> | 413.0915296       | 201.3487135 | -1.03415524  | auxin transporter-like protein 5                 | down    |
| 101206566 | <i>CS-AUX1</i>      | 436.7514737       | 284.2922061 | -0.617977602 | auxin transporter-like protein 4                 | down    |
| 101218948 | <i>LOC101218948</i> | 2093.509986       | 1224.462628 | -0.774066066 | auxin-induced protein AUX28-like                 | down    |
| 101209970 | <i>LOC101209970</i> | 3667.783946       | 4781.92876  | 0.382675861  | auxin-responsive protein IAA26 isoform X2        | up      |
| 101215306 | <i>LOC101215306</i> | 386.9786552       | 269.3011553 | -0.520486582 | auxin-responsive protein IAA13 isoform X1        | down    |
| 101223028 | <i>LOC101223028</i> | 240.5546524       | 126.602255  | -0.929375785 | auxin-responsive protein IAA4                    | down    |
| 101206247 | <i>LOC101206247</i> | 205.9568512       | 96.16620169 | -1.097855929 | indole-3-acetic acid-amido synthetase GH3.17     | down    |
| 101217643 | <i>LOC101217643</i> | 8.494299009       | 0.600228117 | -3.724370843 | auxin-responsive protein SAUR50                  | down    |
| 101209777 | <i>LOC101209777</i> | 497.6096131       | 281.3851537 | -0.822251144 | histidine kinase 4 isoform X1                    | down    |
| 101213450 | <i>LOC101213450</i> | 231.6813887       | 117.8538294 | -0.974345792 | DELLA protein GAI                                | down    |
| 101205993 | <i>LOC101205993</i> | 4054.074448       | 5026.203158 | 0.310178999  | transcription factor PIF5                        | up      |
| 101208823 | <i>LOC101208823</i> | 2189.685268       | 2963.970499 | 0.436698838  | abscisic acid receptor PYL8                      | up      |
| 101204882 | <i>LOC101204882</i> | 704.3018817       | 992.5458647 | 0.495171389  | abscisic acid receptor PYR1                      | up      |
| 101210262 | <i>LOC101210262</i> | 4528.635526       | 5983.85308  | 0.401843236  | abscisic acid receptor PYL5                      | up      |
| 101209540 | <i>LOC101209540</i> | 2104.752403       | 2871.807768 | 0.448377598  | serine/threonine-protein kinase SRK2G isoform X1 | up      |
| 101214088 | <i>LOC101214088</i> | 1827.744737       | 2264.624188 | 0.309041459  | serine/threonine-protein kinase SRK2H            | up      |
| 101222720 | <i>LOC101222720</i> | 701.881049        | 962.5480622 | 0.455126028  | ABSCISIC ACID-INSENSITIVE 5-like protein 2       | up      |
| 101205786 | <i>CS-ERS</i>       | 2058.433654       | 1014.125839 | -1.02145856  | ethylene response sensor 1                       | down    |

|           |                     |             |             |              |                                                                                    |      |
|-----------|---------------------|-------------|-------------|--------------|------------------------------------------------------------------------------------|------|
| 101207154 | <i>LOC101207154</i> | 588.9532738 | 422.8393976 | -0.527090865 | EIN3-binding F-box protein 1-like                                                  | down |
| 101206564 | <i>LOC101206564</i> | 159.0363113 | 65.46705306 | -1.280037711 | ethylene-response factor C3                                                        | down |
| 101220325 | <i>LOC101220325</i> | 320.9817361 | 132.8811344 | -1.271089931 | ethylene-response factor C3                                                        | down |
| 101216386 | <i>LOC101216386</i> | 725.1006672 | 1588.333778 | 1.13084843   | BRASSINOSTEROID INSENSITIVE<br>1-associated receptor kinase 1                      | up   |
| 101217842 | <i>XTH3</i>         | 1321.364173 | 2420.072446 | 0.87298424   | probable xyloglucan<br>endotransglucosylase/hydrolase protein<br>23-like precursor | up   |
| 101212037 | <i>LOC101212037</i> | 1793.913492 | 2334.948208 | 0.380502206  | jasmonoyl--L-amino acid synthetase<br>JAR6                                         | up   |
| 101210308 | <i>LOC101210308</i> | 46.7542977  | 88.70375995 | 0.926697125  | transcription factor TGA2.3 isoform X2                                             | up   |
| 116401613 | <i>LOC116401613</i> | 36.23236296 | 174.2655857 | 2.268223637  | transcription factor TGA1-like isoform<br>X1                                       | up   |

---
