# Supplementary material for: Identification of Key Genes during Ethylene-Induced Adventitious Root Development in Cucumber (Cucumis sativus L.)
Source: MDPI journal article supplement (doi:10.3390/ijms232112981), 2022-10-26
Supplement: s1 [file s1]

**Supplementary Table S2.** Sequences of primers used for RT-qPCR analysis.

| Gene symbol         | NCBI gene accession numbers | Gene ID   | Product size | Primer Sequence (5'-3' )                                      | Primers efficiency | Correlation coefficient (R <sup>2</sup> ) |
|---------------------|-----------------------------|-----------|--------------|---------------------------------------------------------------|--------------------|-------------------------------------------|
| <i>CsGBE1</i>       | ACHR03000062                | 101215687 | 107          | F:GACAGTGAAGGGTTGGCAGGTTG<br>R:TCATCATCTTCGGGTTTGCTCGTATC     | 92.15%             | 0.9927                                    |
| <i>Cseg9</i>        | ACHR03000028                | 101222401 | 81           | F:GTTACTAGCGACGGCGAAGAAGG<br>R:ACAGCAGAGGAAAGCGAATCACTATAC    | 93.41%             | 0.9958                                    |
| <i>Cseg6</i>        | ACHR03000050                | 101203271 | 111          | F:CAGTGGTGGACATAGTGGCTACAATC<br>R:GAAGACGATGCTGGAGATGGAAGTG   | 90.03%             | 0.9864                                    |
| <i>Csβ-G11-like</i> | ACHR03000050                | 101214838 | 116          | F:CTTTCGGTTTGTTTCCTTTGACTGACTC<br>R:ACTTCGGATACTACCATAACCAATG | 97.39%             | 0.9942                                    |
| <i>CsHK2</i>        | ACHR03000083                | 101216058 | 113          | F:TACCTTGGTGAAATTGCTCGTAGAGTG<br>R:TCTGGTGTGCTCAGGATGAATTGC   | 95.62%             | 0.9987                                    |
| <i>CsSS5-like</i>   | ACHR03000028                | 101211461 | 91           | F:TTTACGACGAAGAATGGGCAAATGATG<br>R:GATGGAAGGCTTAACCGAGGAGTTG  | 91.26%             | 0.9092                                    |
| <i>CsPFP</i>        | ACHR03000058                | 101215219 | 83           | F:TTCTCCCGCCAATCCTCCTTCTC                                     | 95.47%             | 0.9956                                    |

|                                |              |           |     |                                                               |        |        |
|--------------------------------|--------------|-----------|-----|---------------------------------------------------------------|--------|--------|
|                                |              |           |     | R:GATGGATACGATGGGCTTGGACTTG                                   |        |        |
| <i>CsPK2</i>                   | ACHR03000062 | 101206620 | 81  | F:CTCGTGTGGTAGACAGCATGACTAAC<br>R:CATCAAGTACAGCATTGGCAACATCAG | 95.52% | 0.9963 |
| <i>CsACS2</i>                  | ACHR03000062 | 101209539 | 83  | F:GATGAAAGAGGTGAGGAGCCAAGATAC<br>R:ATAACATCGCCAACGCCATAGCC    | 93.67% | 0.9281 |
| <i>CsIDH</i>                   | ACHR03000028 | 101202770 | 105 | F:TCCTCCACCTCCTCCTCTACTCTC<br>R:AGAAGAAGAAGAAGAAGCGTAGCATCG   | 98.71% | 0.9860 |
| <i>CsLACS6</i>                 | ACHR03000083 | 101207461 | 82  | F:TTAATTGCGAGTGTTGCTGGATGTTC<br>R:GTGCCAAAGGGAGGTACGATATGTAG  | 96.15% | 0.9785 |
| <i>CsCYP450</i><br><i>86A1</i> | ACHR03000058 | 101214516 | 96  | F:CGCTGGACCGAGGACTTGTTTG<br>R:ACTGGAGATAGCCGATACCGAAGG        | 99.57% | 0.9961 |
| <i>CsLAX5</i>                  | ACHR03000006 | 101205750 | 144 | F:TCTACATCATTCTGCTCTTGCTCAC<br>R:CCAACACCCAAACCACTACAAATGC    | 97.79% | 0.9902 |
| <i>CsGH3.17</i>                | ACHR03000050 | 101206247 | 84  | F:TGAAAGAATTGCCAATGGTGAACCTTC<br>R:CCAGAAGTTCCTGAGCTTGTGAGAAG | 98.15% | 0.9969 |
| <i>CsSAUR50</i>                | ACHR03000083 | 101217643 | 81  | F:TGTCTACGTTGGTCAACACCGAAC<br>R:TGGAGCAAGATTTGGAAAGGAGGATG    | 96.90% | 0.9918 |

|                    |              |           |     |                                                               |         |        |
|--------------------|--------------|-----------|-----|---------------------------------------------------------------|---------|--------|
| <i>CsPYR1</i>      | ACHR03000083 | 101204882 | 96  | F:GACGAGTTGAAGGACTTAGTAGCAGAG<br>R:TGAACACGCTGAGCAAGTAAGGAG   | 98.87%  | 0.9985 |
| <i>CsCS-ERS</i>    | ACHR03000006 | 101205786 | 131 | F:AAGTTGCTTGTGCTATTGTATCGTGTG<br>R:GCCCATCTCCCTGTCAAGTTGTTC   | 103.11% | 0.9891 |
| <i>CsERFC3</i>     | ACHR03000014 | 101206564 | 129 | F:CGGAGATACGAGACTCAACCAGAAATG<br>R:AATTAAGAACGGCGGCGGAACC     | 98.03%  | 0.9936 |
| <i>CsBAK1</i>      | ACHR03000006 | 101216386 | 132 | F:GGGTCGTTTGGCTGATGGTTCTC<br>R:AGACGGAGTAGATTACGGTGGACAG      | 95.48%  | 0.9915 |
| <i>CsPAL</i>       | ACHR03000006 | 101218856 | 148 | F:AGCATCATCCTGGACAGATTGAAGC<br>R:TGCGGTGAAGTTCTAAGAGCGTAAC    | 99.24%  | 0.9979 |
| <i>CsPAO</i>       | ACHR03000028 | 101213059 | 136 | F:CCTTCTAGTCTCTCGTTTGTGGTTTCC<br>R:AGTGAGTGGATCTAGTGGATGGTGAG | 101.05% | 0.9966 |
| <i>CsAt4g34880</i> | ACHR03000006 | 101204792 | 136 | F:GCTGACAGAGAACGAGAGGCTAATAAG<br>R:TAGACCCAAGCAATGCGAATGATCC  | 92.08%  | 0.9816 |
| <i>Csnad5</i>      | HQ860792     | 11123919  | 148 | F:CGCACAGATAGGATCGCATACTTGG<br>R:AGCCGTAGGTGGGTATTCAAATAAAGG  | 99.45%  | 0.9906 |
| <i>CsF3'M</i>      | ACHR03000058 | 101207160 | 103 | F:ATCGTGGAGGAGCATCGGAATTTG                                    | 102.28% | 0.9822 |

|              |              |           |     |                               |        |        |
|--------------|--------------|-----------|-----|-------------------------------|--------|--------|
|              |              |           |     | R:TTCATCTTCACCGTCATCCTTCATTG  |        |        |
| <i>CsHCT</i> | ACHR03000014 | 101207100 | 135 | F:ACCCTGAGTTTCTGAGACAATTCCAAG | 89.07% | 0.9928 |
|              |              |           |     | R:CGTCATAAAGAGGAAGTCGGCAGAG   |        |        |

---
