# Supplementary material for: Identification of Key Genes during Ethylene-Induced Adventitious Root Development in Cucumber (Cucumis sativus L.)
Source: MDPI journal article supplement (doi:10.3390/ijms232112981), 2022-10-26
Supplement: s1 [file s1]

**Supplementary Table S9.** Expression patterns of DEGs related to flavonoid biosynthesis during adventitious root development in cucumber.

| Gene id   | Gene name           | FPKM(the control) | FPKM(ETH)   | log2FC       | Gene description                                    | Up/down |
|-----------|---------------------|-------------------|-------------|--------------|-----------------------------------------------------|---------|
| 101218716 | <i>LOC101218716</i> | 884.4913662       | 497.4645709 | -0.828950716 | probable chalcone--flavonone isomerase 3 isoform X1 | down    |
| 101207160 | <i>LOC101207160</i> | 463.683235        | 73.27810297 | -2.659738715 | flavonoid 3'-monooxygenase                          | down    |
| 101207100 | <i>LOC101207100</i> | 0.302406805       | 6.959013978 | 4.348192306  | stemmadenine O-acetyltransferase                    | up      |
