# Supplementary material for: Identification of Key Genes during Ethylene-Induced Adventitious Root Development in Cucumber (Cucumis sativus L.)
Source: MDPI journal article supplement (doi:10.3390/ijms232112981), 2022-10-26
Supplement: s1 [file s1]

**Supplementary Table S7.** Expression patterns of DEGs related to fatty acid biosynthesis and fatty acid degradation during adventitious root development in cucumber.

| Gene id   | Gene name           | FPKM(the control) | FPKM(ETH)   | log2FC       | Gene description                                                    | Up/down |
|-----------|---------------------|-------------------|-------------|--------------|---------------------------------------------------------------------|---------|
| 101221009 | <i>LOC101221009</i> | 375.7713542       | 521.0006339 | 0.471662802  | NADPH-dependent aldehyde reductase-like protein, chloroplastic      | up      |
| 101210955 | <i>LOC101210955</i> | 562.2575873       | 375.8738699 | -0.58118772  | palmitoyl-acyl carrier protein thioesterase, chloroplastic          | down    |
| 101207461 | <i>LOC101207461</i> | 8358.496775       | 12339.03771 | 0.561967871  | long chain acyl-CoA synthetase 6, peroxisomal                       | up      |
| 101212158 | <i>LOC101212158</i> | 762.3602457       | 1062.390833 | 0.479399183  | long chain acyl-CoA synthetase 8 isoform X1                         | up      |
| 101207461 | <i>LOC101207461</i> | 8358.496775       | 12339.03771 | 0.561967871  | long chain acyl-CoA synthetase 6, peroxisomal                       | up      |
| 101212158 | <i>LOC101212158</i> | 762.3602457       | 1062.390833 | 0.479399183  | long chain acyl-CoA synthetase 8 isoform X1                         | up      |
| 101210295 | <i>LOC101210295</i> | 6764.986849       | 9382.391797 | 0.471956374  | glyoxysomal fatty acid beta-oxidation multifunctional protein MFP-a | up      |
| 101217710 | <i>LOC101217710</i> | 7463.409009       | 11385.71581 | 0.609384671  | 3-ketoacyl-CoA thiolase 2, peroxisomal-like                         | up      |
| 101212707 | <i>LOC101212707</i> | 1515.957865       | 1852.264464 | 0.289143779  | acetyl-CoA acetyltransferase, cytosolic 1                           | up      |
| 101211996 | <i>LOC101211996</i> | 2260.624756       | 1643.027867 | -0.459858207 | alcohol dehydrogenase-like 7                                        | down    |
| 101219569 | <i>LOC101219569</i> | 375.6855858       | 500.8700405 | 0.415714789  | aldehyde dehydrogenase family 3 member H1                           | up      |
| 101214516 | <i>LOC101214516</i> | 18.84412921       | 1.301779452 | -3.821959353 | cytochrome P450 86A1                                                | down    |
