# Supplementary material for: Identification of Key Genes during Ethylene-Induced Adventitious Root Development in Cucumber (Cucumis sativus L.)
Source: MDPI journal article supplement (doi:10.3390/ijms232112981), 2022-10-26
Supplement: s1 [file s1]

**Supplementary Table S1.** Quality statistics of transcriptome.

| <b>Sample</b>  | <b>Raw reads</b> | <b>Clean reads</b> | <b>Clean bases</b> | <b>Error rate</b> | <b>Q20</b> | <b>Q30</b> | <b>GCpct</b> |
|----------------|------------------|--------------------|--------------------|-------------------|------------|------------|--------------|
| the control _1 | 45919430         | 45224954           | 6.78G              | 0.02              | 98.07      | 94.27      | 42.39        |
| the control _2 | 45749502         | 45051114           | 6.76G              | 0.03              | 97.99      | 94.08      | 41.61        |
| the control _3 | 47928220         | 47106620           | 7.07G              | 0.02              | 98.38      | 94.98      | 42.05        |
| ETH_1          | 45413156         | 44594122           | 6.69G              | 0.02              | 98.09      | 94.29      | 42.06        |
| ETH_2          | 46001162         | 44523656           | 6.68G              | 0.02              | 98.23      | 94.69      | 41.5         |
| ETH_3          | 47556332         | 45532650           | 6.83G              | 0.02              | 98.19      | 94.62      | 41.2         |
