# Supplementary material for: Identification of Key Genes during Ethylene-Induced Adventitious Root Development in Cucumber (Cucumis sativus L.)
Source: MDPI journal article supplement (doi:10.3390/ijms232112981), 2022-10-26
Supplement: s1 [file s1]

**Supplementary Table S8.** Expression patterns of DEGs related to phenylalanine metabolism during adventitious root development in cucumber.

| Gene id   | Gene name           | FPKM(the control) | FPKM(ETH)   | log2FC       | Gene description                          | Up/down |
|-----------|---------------------|-------------------|-------------|--------------|-------------------------------------------|---------|
| 101218856 | <i>LOC101218856</i> | 10.16267166       | 44.9672348  | -2.130183977 | phenylalanine ammonia-lyase               | down    |
| 101217299 | <i>LOC101217299</i> | 1696.854769       | 1104.228048 | 0.62006779   | aspartate aminotransferase, mitochondrial | up      |
| 101210998 | <i>LOC101210998</i> | 1076.283911       | 779.1511287 | 0.466434702  | primary amine oxidase isoform X1          | up      |
| 101213059 | <i>LOC101213059</i> | 4122.999035       | 2206.139493 | 0.902290297  | primary amine oxidase                     | up      |
| 101212818 | <i>LOC101212818</i> | 322.4630146       | 182.6097464 | 0.82271878   | primary amine oxidase                     | up      |
| 101214819 | <i>LOC101214819</i> | 621.4243791       | 448.9154708 | 0.4693775    | probable amidase At4g34880                | up      |
| 101204792 | <i>LOC101204792</i> | 103.8942071       | 169.8267418 | -0.709438096 | probable amidase At4g34880                | down    |
