# Supplementary material for: Identification of Key Genes during Ethylene-Induced Adventitious Root Development in Cucumber (Cucumis sativus L.)
Source: MDPI journal article supplement (doi:10.3390/ijms232112981), 2022-10-26
Supplement: s1 [file s1]

**Supplementary Table S5.** Expression patterns of DEGs related to starch and sucrose metabolism during adventitious root development in cucumber.

| Gene id   | Gene name           | FPKM(the control) | FPKM(ETH)   | log2FC       | Gene description                                                                    | Up/down |
|-----------|---------------------|-------------------|-------------|--------------|-------------------------------------------------------------------------------------|---------|
| 101216058 | <i>LOC101216058</i> | 211.5413126       | 119.425566  | -0.824957455 | hexokinase-2, chloroplastic                                                         | down    |
| 101214838 | <i>LOC101214838</i> | 260.6648309       | 137.1208053 | -0.929520598 | beta-glucosidase 11-like                                                            | down    |
| 101204921 | <i>LOC101204921</i> | 1208.417721       | 604.7844765 | -0.997196723 | endoglucanase 17                                                                    | down    |
| 101203271 | <i>LOC101203271</i> | 2681.878408       | 1057.937086 | -1.342280383 | endoglucanase 6                                                                     | down    |
| 101222401 | <i>LOC101222401</i> | 156.0698503       | 54.10416324 | -1.52867718  | endoglucanase 9                                                                     | down    |
| 101221022 | <i>LOC101221022</i> | 2034.689121       | 1483.251714 | -0.455433558 | probable sucrose-phosphate synthase 1                                               | down    |
| 101211097 | <i>LOC101211097</i> | 287.9351312       | 152.5013089 | -0.913794203 | probable trehalose-phosphate phosphatase J                                          | down    |
| 101212172 | <i>LOC101212172</i> | 287.9351312       | 152.5013089 | -0.569243815 | trehalose-phosphate phosphatase A isoform X1                                        | down    |
| 101211461 | <i>LOC101211461</i> | 14140.57061       | 7504.866151 | -0.913911787 | sucrose synthase 5-like                                                             | down    |
| 101221739 | <i>LOC101221739</i> | 5055.58948        | 3130.246729 | -0.691752461 | beta-amylase 1, chloroplastic                                                       | down    |
| 101213455 | <i>LOC101213455</i> | 1254.953454       | 731.1416041 | -0.779306025 | beta-amylase 3, chloroplastic                                                       | down    |
| 101222005 | <i>LOC101222005</i> | 702.1943017       | 967.2566244 | 0.462459969  | beta-amylase isoform X1                                                             | up      |
| 101215687 | <i>LOC101215687</i> | 16778.54928       | 26114.06217 | 0.638245864  | 1,4-alpha-glucan-branching enzyme 1, chloroplastic/amyloplastic                     | up      |
| 101221562 | <i>LOC101221562</i> | 833.7599588       | 579.6210721 | -0.524554892 | glucose-1-phosphate adenylyltransferase large subunit 1                             | down    |
| 101208904 | <i>LOC101208904</i> | 1744.897462       | 1046.879964 | -0.736968108 | glucose-1-phosphate adenylyltransferase large subunit 1                             | down    |
| 101208605 | <i>LOC101208605</i> | 2614.131422       | 1927.173602 | -0.439326203 | glucose-1-phosphate adenylyltransferase large subunit 3, chloroplastic/amyloplastic | down    |
| 101209348 | <i>LOC101209348</i> | 424.2250124       | 302.0410415 | -0.489680863 | isoamylase 3, chloroplastic isoform X1                                              | down    |
