# Supplementary material for: Identification of Key Genes during Ethylene-Induced Adventitious Root Development in Cucumber (Cucumis sativus L.)
Source: MDPI journal article supplement (doi:10.3390/ijms232112981), 2022-10-26
Supplement: s1 [file s1]

**Supplementary Table S6.** Expression patterns of DEGs related to glycolysis / gluconeogenesis, TCA cycle and oxidative phosphorylation during adventitious root development in cucumber.

| Gene id   | Gene name           | FPKM(the control) | FPKM(ETH)   | log2FC       | Gene description                                                                                                 | Up/down |
|-----------|---------------------|-------------------|-------------|--------------|------------------------------------------------------------------------------------------------------------------|---------|
| 101216058 | <i>LOC101216058</i> | 211.5413126       | 119.425566  | -0.824957455 | hexokinase-2, chloroplastic                                                                                      | down    |
| 101202739 | <i>LOC101202739</i> | 519.2778174       | 380.5966674 | -0.447867239 | ATP-dependent 6-phosphofructokinase 7                                                                            | down    |
| 101215219 | <i>LOC101215219</i> | 89.86761101       | 30.10202069 | -1.574815215 | pyrophosphate--fructose 6-phosphate<br>1-phosphotransferase subunit beta                                         | down    |
| 101219631 | <i>LOC101219631</i> | 893.4465961       | 1162.772511 | 0.379958475  | phosphoglycerate kinase, cytosolic<br>isoform X1                                                                 | up      |
| 101215513 | <i>LOC101215513</i> | 4051.997044       | 3189.331605 | -0.345317487 | phosphoglycerate kinase, cytosolic                                                                               | down    |
| 101206620 | <i>LOC101206620</i> | 473.5240406       | 307.2283788 | -0.624220059 | pyruvate kinase 2, cytosolic                                                                                     | down    |
| 101220786 | <i>LOC101220786</i> | 413.6381879       | 280.1318568 | -0.56075632  | plastidial pyruvate kinase 1, chloroplastic                                                                      | down    |
| 101215151 | <i>LOC101215151</i> | 661.7114477       | 504.9215729 | -0.389212571 | dihydrolipoyllysine-residue<br>acetyltransferase component 5 of pyruvate<br>dehydrogenase complex, chloroplastic | down    |
| 101220730 | <i>LOC101220730</i> | 547.9298619       | 383.0058965 | -0.516365518 | dihydrolipoyllysine-residue<br>acetyltransferase component 4 of pyruvate<br>dehydrogenase complex, chloroplastic | down    |
| 101204247 | <i>LOC101204247</i> | 1273.343042       | 891.5546015 | -0.513627027 | pyruvate dehydrogenase E1 component<br>subunit beta-3, chloroplastic                                             | down    |
| 101219569 | <i>LOC101219569</i> | 375.6855858       | 500.8700405 | 0.415714789  | aldehyde dehydrogenase family 3 member<br>H1                                                                     | up      |
| 101211996 | <i>LOC101211996</i> | 2260.624756       | 1643.027867 | -0.459858207 | alcohol dehydrogenase-like 7                                                                                     | down    |
| 101215151 | <i>LOC101215151</i> | 661.7114477       | 504.9215729 | -0.389212571 | dihydrolipoyllysine-residue<br>acetyltransferase component 5 of pyruvate                                         | down    |

|           |                     |             |             |              |                                           |      |
|-----------|---------------------|-------------|-------------|--------------|-------------------------------------------|------|
|           |                     |             |             |              | dehydrogenase complex, chloroplastic      |      |
|           |                     |             |             |              | dihydrolipoyllysine-residue               |      |
| 101220730 | <i>LOC101220730</i> | 547.9298619 | 383.0058965 | -0.516365518 | acetyltransferase component 4 of pyruvate | down |
|           |                     |             |             |              | dehydrogenase complex, chloroplastic      |      |
| 101204247 | <i>LOC101204247</i> | 1273.343042 | 891.5546015 | -0.513627027 | pyruvate dehydrogenase E1 component       | down |
|           |                     |             |             |              | subunit beta-3, chloroplastic             |      |
| 101209539 | <i>LOC101209539</i> | 250.3699517 | 121.3426549 | -1.042566389 | ATP-citrate synthase beta chain protein 2 | down |
| 101202770 | <i>LOC101202770</i> | 370.5677261 | 240.9848612 | -0.621522706 | isocitrate dehydrogenase [NADP]           | down |
| 101208633 | <i>LOC101208633</i> | 1809.730389 | 1463.980823 | 0.30559677   | NADH dehydrogenase [ubiquinone] 1         | up   |
|           |                     |             |             |              | alpha subcomplex subunit 2                |      |
| 11123919  | <i>nad5</i>         | 52.10098238 | 19.30980126 | 1.431974932  | nad5; NADH dehydrogenase subunit 5        | up   |
| 101205555 | <i>LOC101205555</i> | 39.46192654 | 93.58787469 | -1.23829297  | uncharacterized protein LOC101205555      | down |
| 101213505 | <i>LOC101213505</i> | 6719.296802 | 4493.616087 | 0.580362     | plasma membrane ATPase 4                  | up   |

---
