# Supplementary material for: Identification of Key Genes during Ethylene-Induced Adventitious Root Development in Cucumber (Cucumis sativus L.)
Source: Int J Mol Sci. 2022 Oct 26;23(21):12981. doi: 10.3390/ijms232112981 (PMC9658848; doi:10.3390/ijms232112981)
Supplement: Supplementary file 1 [file ijms-23-12981-s001.zip]

Archive with 12 entries (12 files):
- ijms-1968823-supplementary/Supplementary Figure S1.pdf
- ijms-1968823-supplementary/Supplementary Figure S2.pdf
- ijms-1968823-supplementary/Supplementary Table S10.pdf
- ijms-1968823-supplementary/Supplementary Table S3.xlsx
- ijms-1968823-supplementary/Supplementary Table S4.xlsx
- ijms-1968823-supplementary/Supplementary Table S5.pdf
- ijms-1968823-supplementary/Supplementary Table S6.pdf
- ijms-1968823-supplementary/Supplementary Table S7.pdf
- ijms-1968823-supplementary/Supplementary Table S8.pdf
- ijms-1968823-supplementary/Supplementary Table S9.pdf
- ijms-1968823-supplementary/Supplementary Table S1.pdf
- ijms-1968823-supplementary/Supplementary Table S2.pdf
