# Supplementary material for: Identification of Key Genes during Ethylene-Induced Adventitious Root Development in Cucumber (Cucumis sativus L.)
Source: Int J Mol Sci. 2022 Oct 26;23(21):12981. doi: 10.3390/ijms232112981 (PMC9658848; doi:10.3390/ijms232112981)
Supplement: Supplementary file 1 [file ijms-23-12981-s001.zip › ijms-1968823-supplementary/Supplementary Table S3.xlsx]

## Sheet: Sheet1
Supplementary Table S3 GO enrichment analysis of DEGs
Category	GOID	Description	GeneRatio	BgRatio	pvalue	padj	geneID	geneName	Count	Up	Up_Gene_id	Down	Down_Gene_id
BP	GO:0016052	carbohydrate catabolic process	11/514	42/6219	0.000443578	0.056671	101215219/101206887/101221739/101220786/101206620/101222005/101202739/101219631/101213455/101220704/101215513	LOC101215219/LOC101206887/LOC101221739/LOC101220786/LOC101206620/LOC101222005/LOC101202739/LOC101219631/LOC101213455/LOC101220704/LOC101215513	11	2	101222005/101219631	9	101215219/101206887/101221739/101220786/101206620/101202739/101213455/101220704/101215513
BP	GO:0009166	nucleotide catabolic process	9/514	31/6219	0.000647351	0.056671	101215219/101206887/101220786/101206620/101215456/101202739/101219631/101220704/101215513	LOC101215219/LOC101206887/LOC101220786/LOC101206620/LOC101215456/LOC101202739/LOC101219631/LOC101220704/LOC101215513	9	2	101215456/101219631	7	101215219/101206887/101220786/101206620/101202739/101220704/101215513
BP	GO:1901292	nucleoside phosphate catabolic process	9/514	31/6219	0.000647351	0.056671	101215219/101206887/101220786/101206620/101215456/101202739/101219631/101220704/101215513	LOC101215219/LOC101206887/LOC101220786/LOC101206620/LOC101215456/LOC101202739/LOC101219631/LOC101220704/LOC101215513	9	2	101215456/101219631	7	101215219/101206887/101220786/101206620/101202739/101220704/101215513
BP	GO:0034404	nucleobase-containing small molecule biosynthetic process	10/514	38/6219	0.000771751	0.056671	101215219/101206887/101220786/101206620/101206917/101215456/101202739/101219631/101220704/101215513	LOC101215219/LOC101206887/LOC101220786/LOC101206620/LOC101206917/LOC101215456/LOC101202739/LOC101219631/LOC101220704/LOC101215513	10	3	101206917/101215456/101219631	7	101215219/101206887/101220786/101206620/101202739/101220704/101215513
BP	GO:0006090	pyruvate metabolic process	9/514	32/6219	0.000835855	0.056671	101215219/101206887/101220786/101212295/101206620/101202739/101219631/101220704/101215513	LOC101215219/LOC101206887/LOC101220786/LOC101212295/LOC101206620/LOC101202739/LOC101219631/LOC101220704/LOC101215513	9	1	101219631	8	101215219/101206887/101220786/101212295/101206620/101202739/101220704/101215513
BP	GO:0005975	carbohydrate metabolic process	51/514	401/6219	0.00104396	0.0570903	116403226/101203271/101213219/101207227/101215219/101221789/101213462/101207903/101211924/101207441/101202924/101217842/101204921/101212207/101206887/101206249/101221682/101221739/101220786/101221022/101205724/101208641/101206620/101211461/101222401/101222005/101219670/101209366/101211097/101211777/101216058/101215687/101222408/101202739/101209348/101214061/101212172/101217094/101206292/101207915…	LOC116403226/LOC101203271/LOC101213219/LOC101207227/LOC101215219/LOC101221789/LOC101213462/LOC101207903/LOC101211924/LOC101207441/LOC101202924/XTH3/LOC101204921/LOC101212207/LOC101206887/LOC101206249/LOC101221682/LOC101221739/LOC101220786/LOC101221022/LOC101205724/LOC101208641/LOC101206620/LOC101211461/LOC101222401/LOC101222005/LOC101219670/LOC101209366/LOC101211097/LOC101211777/LOC101216058/LOC1…	51	16	101213219/101213462/101211924/101207441/101217842/101212207/101206249/101208641/101222005/101219670/101211777/101215687/101206292/101219631/101216524/101214523	35	116403226/101203271/101207227/101215219/101221789/101207903/101202924/101204921/101206887/101221682/101221739/101220786/101221022/101205724/101206620/101211461/101222401/101209366/101211097/101216058/101222408/101202739/101209348/101214061/101212172/101217094/101207915/101213455/101220704/101214838/101211792/101216943/101217992/101215513/101221189
BP	GO:0046434	organophosphate catabolic process	9/514	34/6219	0.00134649	0.0570903	101215219/101206887/101220786/101206620/101215456/101202739/101219631/101220704/101215513	LOC101215219/LOC101206887/LOC101220786/LOC101206620/LOC101215456/LOC101202739/LOC101219631/LOC101220704/LOC101215513	9	2	101215456/101219631	7	101215219/101206887/101220786/101206620/101202739/101220704/101215513
BP	GO:0006096	glycolytic process	8/514	30/6219	0.00235771	0.0570903	101215219/101206887/101220786/101206620/101202739/101219631/101220704/101215513	LOC101215219/LOC101206887/LOC101220786/LOC101206620/LOC101202739/LOC101219631/LOC101220704/LOC101215513	8	1	101219631	7	101215219/101206887/101220786/101206620/101202739/101220704/101215513
BP	GO:0006757	ATP generation from ADP	8/514	30/6219	0.00235771	0.0570903	101215219/101206887/101220786/101206620/101202739/101219631/101220704/101215513	LOC101215219/LOC101206887/LOC101220786/LOC101206620/LOC101202739/LOC101219631/LOC101220704/LOC101215513	8	1	101219631	7	101215219/101206887/101220786/101206620/101202739/101220704/101215513
BP	GO:0009135	purine nucleoside diphosphate metabolic process	8/514	30/6219	0.00235771	0.0570903	101215219/101206887/101220786/101206620/101202739/101219631/101220704/101215513	LOC101215219/LOC101206887/LOC101220786/LOC101206620/LOC101202739/LOC101219631/LOC101220704/LOC101215513	8	1	101219631	7	101215219/101206887/101220786/101206620/101202739/101220704/101215513
BP	GO:0009179	purine ribonucleoside diphosphate metabolic process	8/514	30/6219	0.00235771	0.0570903	101215219/101206887/101220786/101206620/101202739/101219631/101220704/101215513	LOC101215219/LOC101206887/LOC101220786/LOC101206620/LOC101202739/LOC101219631/LOC101220704/LOC101215513	8	1	101219631	7	101215219/101206887/101220786/101206620/101202739/101220704/101215513
BP	GO:0009185	ribonucleoside diphosphate metabolic process	8/514	30/6219	0.00235771	0.0570903	101215219/101206887/101220786/101206620/101202739/101219631/101220704/101215513	LOC101215219/LOC101206887/LOC101220786/LOC101206620/LOC101202739/LOC101219631/LOC101220704/LOC101215513	8	1	101219631	7	101215219/101206887/101220786/101206620/101202739/101220704/101215513
BP	GO:0042866	pyruvate biosynthetic process	8/514	30/6219	0.00235771	0.0570903	101215219/101206887/101220786/101206620/101202739/101219631/101220704/101215513	LOC101215219/LOC101206887/LOC101220786/LOC101206620/LOC101202739/LOC101219631/LOC101220704/LOC101215513	8	1	101219631	7	101215219/101206887/101220786/101206620/101202739/101220704/101215513
BP	GO:0046031	ADP metabolic process	8/514	30/6219	0.00235771	0.0570903	101215219/101206887/101220786/101206620/101202739/101219631/101220704/101215513	LOC101215219/LOC101206887/LOC101220786/LOC101206620/LOC101202739/LOC101219631/LOC101220704/LOC101215513	8	1	101219631	7	101215219/101206887/101220786/101206620/101202739/101220704/101215513
BP	GO:0046700	heterocycle catabolic process	11/514	53/6219	0.00343835	0.0678823	101215219/101206887/101220786/101206620/101203653/101215456/101202739/101219631/116406046/101220704/101215513	LOC101215219/LOC101206887/LOC101220786/LOC101206620/LOC101203653/LOC101215456/LOC101202739/LOC101219631/LOC116406046/LOC101220704/LOC101215513	11	3	101215456/101219631/116406046	8	101215219/101206887/101220786/101206620/101203653/101202739/101220704/101215513
BP	GO:1901361	organic cyclic compound catabolic process	11/514	53/6219	0.00343835	0.0678823	101215219/101206887/101220786/101206620/101203653/101215456/101202739/101219631/116406046/101220704/101215513	LOC101215219/LOC101206887/LOC101220786/LOC101206620/LOC101203653/LOC101215456/LOC101202739/LOC101219631/LOC116406046/LOC101220704/LOC101215513	11	3	101215456/101219631/116406046	8	101215219/101206887/101220786/101206620/101203653/101202739/101220704/101215513
BP	GO:0034655	nucleobase-containing compound catabolic process	10/514	46/6219	0.00365172	0.0678823	101215219/101206887/101220786/101206620/101215456/101202739/101219631/116406046/101220704/101215513	LOC101215219/LOC101206887/LOC101220786/LOC101206620/LOC101215456/LOC101202739/LOC101219631/LOC116406046/LOC101220704/LOC101215513	10	3	101215456/101219631/116406046	7	101215219/101206887/101220786/101206620/101202739/101220704/101215513
BP	GO:0006952	defense response	12/514	61/6219	0.00365385	0.0678823	116403755/101212424/101211231/101215838/116403708/101206213/101207497/101218928/101209055/101205729/101212923/101221560	LOC116403755/LOC101212424/LOC101211231/LOC101215838/LOC116403708/LOC101206213/LOC101207497/LOC101218928/LOC101209055/LOC101205729/LOC101212923/LOC101221560	12	5	116403755/101215838/101206213/101209055/101212923	7	101212424/101211231/116403708/101207497/101218928/101205729/101221560
BP	GO:0019439	aromatic compound catabolic process	11/514	54/6219	0.00400486	0.0678823	101215219/101206887/101220786/101206620/101203653/101215456/101202739/101219631/116406046/101220704/101215513	LOC101215219/LOC101206887/LOC101220786/LOC101206620/LOC101203653/LOC101215456/LOC101202739/LOC101219631/LOC116406046/LOC101220704/LOC101215513	11	3	101215456/101219631/116406046	8	101215219/101206887/101220786/101206620/101203653/101202739/101220704/101215513
BP	GO:0044270	cellular nitrogen compound catabolic process	11/514	54/6219	0.00400486	0.0678823	101215219/101206887/101220786/101206620/101203653/101215456/101202739/101219631/116406046/101220704/101215513	LOC101215219/LOC101206887/LOC101220786/LOC101206620/LOC101203653/LOC101215456/LOC101202739/LOC101219631/LOC116406046/LOC101220704/LOC101215513	11	3	101215456/101219631/116406046	8	101215219/101206887/101220786/101206620/101203653/101202739/101220704/101215513
BP	GO:0044262	cellular carbohydrate metabolic process	17/514	105/6219	0.00522166	0.0803865	116403226/101213219/101213462/101207441/101217842/101221682/101221022/101205724/101208641/101211461/101209366/101211097/101211777/101214061/101212172/101214523/101217992	LOC116403226/LOC101213219/LOC101213462/LOC101207441/XTH3/LOC101221682/LOC101221022/LOC101205724/LOC101208641/LOC101211461/LOC101209366/LOC101211097/LOC101211777/LOC101214061/LOC101212172/LOC101214523/LOC101217992	17	7	101213219/101213462/101207441/101217842/101208641/101211777/101214523	10	116403226/101221682/101221022/101205724/101211461/101209366/101211097/101214061/101212172/101217992
BP	GO:0006165	nucleoside diphosphate phosphorylation	8/514	34/6219	0.00545395	0.0803865	101215219/101206887/101220786/101206620/101202739/101219631/101220704/101215513	LOC101215219/LOC101206887/LOC101220786/LOC101206620/LOC101202739/LOC101219631/LOC101220704/LOC101215513	8	1	101219631	7	101215219/101206887/101220786/101206620/101202739/101220704/101215513
BP	GO:0046939	nucleotide phosphorylation	8/514	34/6219	0.00545395	0.0803865	101215219/101206887/101220786/101206620/101202739/101219631/101220704/101215513	LOC101215219/LOC101206887/LOC101220786/LOC101206620/LOC101202739/LOC101219631/LOC101220704/LOC101215513	8	1	101219631	7	101215219/101206887/101220786/101206620/101202739/101220704/101215513
BP	GO:0009607	response to biotic stimulus	9/514	42/6219	0.00632291	0.0856811	116403755/101212424/101211231/101215838/116403708/101206213/101207497/101218928/101209055	LOC116403755/LOC101212424/LOC101211231/LOC101215838/LOC116403708/LOC101206213/LOC101207497/LOC101218928/LOC101209055	9	4	116403755/101215838/101206213/101209055	5	101212424/101211231/116403708/101207497/101218928
BP	GO:0032787	monocarboxylic acid metabolic process	15/514	90/6219	0.00644131	0.0856811	101215219/101217359/101206887/101203441/101220786/101212295/101206620/101210955/101218433/101202739/101219631/101220704/101210295/101214523/101215513	LOC101215219/LOC101217359/LOC101206887/LOC101203441/LOC101220786/LOC101212295/LOC101206620/LOC101210955/LOC101218433/LOC101202739/LOC101219631/LOC101220704/LOC101210295/LOC101214523/LOC101215513	15	3	101219631/101210295/101214523	12	101215219/101217359/101206887/101203441/101220786/101212295/101206620/101210955/101218433/101202739/101220704/101215513
BP	GO:0009132	nucleoside diphosphate metabolic process	8/514	35/6219	0.00657141	0.0856811	101215219/101206887/101220786/101206620/101202739/101219631/101220704/101215513	LOC101215219/LOC101206887/LOC101220786/LOC101206620/LOC101202739/LOC101219631/LOC101220704/LOC101215513	8	1	101219631	7	101215219/101206887/101220786/101206620/101202739/101220704/101215513
BP	GO:0019359	nicotinamide nucleotide biosynthetic process	8/514	37/6219	0.00931576	0.112787	101215219/101206887/101220786/101206620/101202739/101219631/101220704/101215513	LOC101215219/LOC101206887/LOC101220786/LOC101206620/LOC101202739/LOC101219631/LOC101220704/LOC101215513	8	1	101219631	7	101215219/101206887/101220786/101206620/101202739/101220704/101215513
BP	GO:0019363	pyridine nucleotide biosynthetic process	8/514	37/6219	0.00931576	0.112787	101215219/101206887/101220786/101206620/101202739/101219631/101220704/101215513	LOC101215219/LOC101206887/LOC101220786/LOC101206620/LOC101202739/LOC101219631/LOC101220704/LOC101215513	8	1	101219631	7	101215219/101206887/101220786/101206620/101202739/101220704/101215513
BP	GO:0005976	polysaccharide metabolic process	13/514	80/6219	0.0132966	0.142055	101213219/101213462/101217842/101221682/101221739/101205724/101208641/101222005/101209366/101211777/101214061/101213455/101217992	LOC101213219/LOC101213462/XTH3/LOC101221682/LOC101221739/LOC101205724/LOC101208641/LOC101222005/LOC101209366/LOC101211777/LOC101214061/LOC101213455/LOC101217992	13	6	101213219/101213462/101217842/101208641/101222005/101211777	7	101221682/101221739/101205724/101209366/101214061/101213455/101217992
BP	GO:0008272	sulfate transport	4/514	12/6219	0.0133495	0.142055	101202870/116403192/101203205/101219163	LOC101202870/LOC116403192/LOC101203205/LOC101219163	4	1	101219163	3	101202870/116403192/101203205
BP	GO:0072348	sulfur compound transport	4/514	12/6219	0.0133495	0.142055	101202870/116403192/101203205/101219163	LOC101202870/LOC116403192/LOC101203205/LOC101219163	4	1	101219163	3	101202870/116403192/101203205
BP	GO:0006091	generation of precursor metabolites and energy	10/514	55/6219	0.0134093	0.142055	101215219/101206887/101208329/101220786/101206620/101216256/101202739/101219631/101220704/101215513	LOC101215219/LOC101206887/LOC101208329/LOC101220786/LOC101206620/PPC3/LOC101202739/LOC101219631/LOC101220704/LOC101215513	10	1	101219631	9	101215219/101206887/101208329/101220786/101206620/101216256/101202739/101220704/101215513
BP	GO:0072525	pyridine-containing compound biosynthetic process	8/514	41/6219	0.0172386	0.177088	101215219/101206887/101220786/101206620/101202739/101219631/101220704/101215513	LOC101215219/LOC101206887/LOC101220786/LOC101206620/LOC101202739/LOC101219631/LOC101220704/LOC101215513	8	1	101219631	7	101215219/101206887/101220786/101206620/101202739/101220704/101215513
BP	GO:0072330	monocarboxylic acid biosynthetic process	12/514	75/6219	0.0190905	0.190343	101215219/101217359/101206887/101203441/101220786/101206620/101210955/101218433/101202739/101219631/101220704/101215513	LOC101215219/LOC101217359/LOC101206887/LOC101203441/LOC101220786/LOC101206620/LOC101210955/LOC101218433/LOC101202739/LOC101219631/LOC101220704/LOC101215513	12	1	101219631	11	101215219/101217359/101206887/101203441/101220786/101206620/101210955/101218433/101202739/101220704/101215513
BP	GO:0006820	anion transport	9/514	50/6219	0.0197287	0.191086	101202870/101211429/101218761/116403192/101210964/101209987/101203205/101217853/101219163	LOC101202870/LOC101211429/LOC101218761/LOC116403192/LOC101210964/LOC101209987/LOC101203205/LOC101217853/LOC101219163	9	5	101211429/101218761/101209987/101217853/101219163	4	101202870/116403192/101210964/101203205
BP	GO:0006754	ATP biosynthetic process	9/514	51/6219	0.0222669	0.201943	101215219/101206887/101220786/101206620/101205555/101202739/101219631/101220704/101215513	LOC101215219/LOC101206887/LOC101220786/LOC101206620/LOC101205555/LOC101202739/LOC101219631/LOC101220704/LOC101215513	9	1	101219631	8	101215219/101206887/101220786/101206620/101205555/101202739/101220704/101215513
BP	GO:0019362	pyridine nucleotide metabolic process	8/514	43/6219	0.0226367	0.201943	101215219/101206887/101220786/101206620/101202739/101219631/101220704/101215513	LOC101215219/LOC101206887/LOC101220786/LOC101206620/LOC101202739/LOC101219631/LOC101220704/LOC101215513	8	1	101219631	7	101215219/101206887/101220786/101206620/101202739/101220704/101215513
BP	GO:0046496	nicotinamide nucleotide metabolic process	8/514	43/6219	0.0226367	0.201943	101215219/101206887/101220786/101206620/101202739/101219631/101220704/101215513	LOC101215219/LOC101206887/LOC101220786/LOC101206620/LOC101202739/LOC101219631/LOC101220704/LOC101215513	8	1	101219631	7	101215219/101206887/101220786/101206620/101202739/101220704/101215513
BP	GO:0006733	oxidoreduction coenzyme metabolic process	8/514	44/6219	0.0257396	0.223736	101215219/101206887/101220786/101206620/101202739/101219631/101220704/101215513	LOC101215219/LOC101206887/LOC101220786/LOC101206620/LOC101202739/LOC101219631/LOC101220704/LOC101215513	8	1	101219631	7	101215219/101206887/101220786/101206620/101202739/101220704/101215513
BP	GO:0009056	catabolic process	19/514	146/6219	0.0309712	0.239893	101215219/105434867/101222731/101206887/101221089/101221739/101220786/101206620/101214589/101222005/101203653/101215456/101202739/101219631/101213455/116406046/101220704/101209121/101215513	LOC101215219/LOC105434867/LOC101222731/LOC101206887/LOC101221089/LOC101221739/LOC101220786/LOC101206620/LOC101214589/LOC101222005/LOC101203653/LOC101215456/LOC101202739/LOC101219631/LOC101213455/LOC116406046/LOC101220704/LOC101209121/LOC101215513	19	9	105434867/101222731/101221089/101214589/101222005/101215456/101219631/116406046/101209121	10	101215219/101206887/101221739/101220786/101206620/101203653/101202739/101213455/101220704/101215513
BP	GO:0009127	purine nucleoside monophosphate biosynthetic process	9/514	54/6219	0.0312726	0.239893	101215219/101206887/101220786/101206620/101205555/101202739/101219631/101220704/101215513	LOC101215219/LOC101206887/LOC101220786/LOC101206620/LOC101205555/LOC101202739/LOC101219631/LOC101220704/LOC101215513	9	1	101219631	8	101215219/101206887/101220786/101206620/101205555/101202739/101220704/101215513
BP	GO:0009156	ribonucleoside monophosphate biosynthetic process	9/514	54/6219	0.0312726	0.239893	101215219/101206887/101220786/101206620/101205555/101202739/101219631/101220704/101215513	LOC101215219/LOC101206887/LOC101220786/LOC101206620/LOC101205555/LOC101202739/LOC101219631/LOC101220704/LOC101215513	9	1	101219631	8	101215219/101206887/101220786/101206620/101205555/101202739/101220704/101215513
BP	GO:0009168	purine ribonucleoside monophosphate biosynthetic process	9/514	54/6219	0.0312726	0.239893	101215219/101206887/101220786/101206620/101205555/101202739/101219631/101220704/101215513	LOC101215219/LOC101206887/LOC101220786/LOC101206620/LOC101205555/LOC101202739/LOC101219631/LOC101220704/LOC101215513	9	1	101219631	8	101215219/101206887/101220786/101206620/101205555/101202739/101220704/101215513
BP	GO:0009124	nucleoside monophosphate biosynthetic process	9/514	55/6219	0.0347676	0.239893	101215219/101206887/101220786/101206620/101205555/101202739/101219631/101220704/101215513	LOC101215219/LOC101206887/LOC101220786/LOC101206620/LOC101205555/LOC101202739/LOC101219631/LOC101220704/LOC101215513	9	1	101219631	8	101215219/101206887/101220786/101206620/101205555/101202739/101220704/101215513
BP	GO:0009142	nucleoside triphosphate biosynthetic process	9/514	55/6219	0.0347676	0.239893	101215219/101206887/101220786/101206620/101205555/101202739/101219631/101220704/101215513	LOC101215219/LOC101206887/LOC101220786/LOC101206620/LOC101205555/LOC101202739/LOC101219631/LOC101220704/LOC101215513	9	1	101219631	8	101215219/101206887/101220786/101206620/101205555/101202739/101220704/101215513
BP	GO:0009145	purine nucleoside triphosphate biosynthetic process	9/514	55/6219	0.0347676	0.239893	101215219/101206887/101220786/101206620/101205555/101202739/101219631/101220704/101215513	LOC101215219/LOC101206887/LOC101220786/LOC101206620/LOC101205555/LOC101202739/LOC101219631/LOC101220704/LOC101215513	9	1	101219631	8	101215219/101206887/101220786/101206620/101205555/101202739/101220704/101215513
BP	GO:0009201	ribonucleoside triphosphate biosynthetic process	9/514	55/6219	0.0347676	0.239893	101215219/101206887/101220786/101206620/101205555/101202739/101219631/101220704/101215513	LOC101215219/LOC101206887/LOC101220786/LOC101206620/LOC101205555/LOC101202739/LOC101219631/LOC101220704/LOC101215513	9	1	101219631	8	101215219/101206887/101220786/101206620/101205555/101202739/101220704/101215513
BP	GO:0009206	purine ribonucleoside triphosphate biosynthetic process	9/514	55/6219	0.0347676	0.239893	101215219/101206887/101220786/101206620/101205555/101202739/101219631/101220704/101215513	LOC101215219/LOC101206887/LOC101220786/LOC101206620/LOC101205555/LOC101202739/LOC101219631/LOC101220704/LOC101215513	9	1	101219631	8	101215219/101206887/101220786/101206620/101205555/101202739/101220704/101215513
BP	GO:0015698	inorganic anion transport	5/514	23/6219	0.036567	0.239893	101202870/116403192/101209987/101203205/101219163	LOC101202870/LOC116403192/LOC101209987/LOC101203205/LOC101219163	5	2	101209987/101219163	3	101202870/116403192/101203205
BP	GO:0006928	movement of cell or subcellular component	8/514	47/6219	0.0367978	0.239893	101218717/101204935/101214929/101221926/101206252/101212819/101215425/101203593	LOC101218717/LOC101204935/LOC101214929/LOC101221926/LOC101206252/LOC101212819/LOC101215425/LOC101203593	8	0		8	101218717/101204935/101214929/101221926/101206252/101212819/101215425/101203593
BP	GO:0007018	microtubule-based movement	8/514	47/6219	0.0367978	0.239893	101218717/101204935/101214929/101221926/101206252/101212819/101215425/101203593	LOC101218717/LOC101204935/LOC101214929/LOC101221926/LOC101206252/LOC101212819/LOC101215425/LOC101203593	8	0		8	101218717/101204935/101214929/101221926/101206252/101212819/101215425/101203593
BP	GO:0072524	pyridine-containing compound metabolic process	8/514	47/6219	0.0367978	0.239893	101215219/101206887/101220786/101206620/101202739/101219631/101220704/101215513	LOC101215219/LOC101206887/LOC101220786/LOC101206620/LOC101202739/LOC101219631/LOC101220704/LOC101215513	8	1	101219631	7	101215219/101206887/101220786/101206620/101202739/101220704/101215513
BP	GO:0006082	organic acid metabolic process	27/514	232/6219	0.0423773	0.271055	101207177/101215219/116406341/101217359/101206887/101203441/101208329/101220786/101212295/101203129/101206620/101210547/101210955/101218433/101216256/101202739/101222636/101214714/101219631/101220704/101210295/101215982/101205401/101214523/101220233/101215513/101211723	LOC101207177/LOC101215219/LOC116406341/LOC101217359/LOC101206887/LOC101203441/LOC101208329/LOC101220786/LOC101212295/LOC101203129/LOC101206620/LOC101210547/LOC101210955/LOC101218433/PPC3/LOC101202739/LOC101222636/LOC101214714/LOC101219631/LOC101220704/LOC101210295/LOC101215982/LOC101205401/LOC101214523/LOC101220233/LOC101215513/LOC101211723	27	8	116406341/101210547/101214714/101219631/101210295/101215982/101214523/101220233	19	101207177/101215219/101217359/101206887/101203441/101208329/101220786/101212295/101203129/101206620/101210955/101218433/101216256/101202739/101222636/101220704/101205401/101215513/101211723
BP	GO:0005984	disaccharide metabolic process	5/514	25/6219	0.0504304	0.316581	116403226/101221022/101211461/101211097/101212172	LOC116403226/LOC101221022/LOC101211461/LOC101211097/LOC101212172	5	0		5	116403226/101221022/101211461/101211097/101212172
BP	GO:0044248	cellular catabolic process	16/514	125/6219	0.0513627	0.316581	101215219/105434867/101222731/101206887/101221089/101220786/101206620/101214589/101203653/101215456/101202739/101219631/116406046/101220704/101209121/101215513	LOC101215219/LOC105434867/LOC101222731/LOC101206887/LOC101221089/LOC101220786/LOC101206620/LOC101214589/LOC101203653/LOC101215456/LOC101202739/LOC101219631/LOC116406046/LOC101220704/LOC101209121/LOC101215513	16	8	105434867/101222731/101221089/101214589/101215456/101219631/116406046/101209121	8	101215219/101206887/101220786/101206620/101203653/101202739/101220704/101215513
BP	GO:0009152	purine ribonucleotide biosynthetic process	9/514	60/6219	0.0562699	0.323314	101215219/101206887/101220786/101206620/101205555/101202739/101219631/101220704/101215513	LOC101215219/LOC101206887/LOC101220786/LOC101206620/LOC101205555/LOC101202739/LOC101219631/LOC101220704/LOC101215513	9	1	101219631	8	101215219/101206887/101220786/101206620/101205555/101202739/101220704/101215513
BP	GO:0009260	ribonucleotide biosynthetic process	9/514	60/6219	0.0562699	0.323314	101215219/101206887/101220786/101206620/101205555/101202739/101219631/101220704/101215513	LOC101215219/LOC101206887/LOC101220786/LOC101206620/LOC101205555/LOC101202739/LOC101219631/LOC101220704/LOC101215513	9	1	101219631	8	101215219/101206887/101220786/101206620/101205555/101202739/101220704/101215513
BP	GO:0046034	ATP metabolic process	9/514	60/6219	0.0562699	0.323314	101215219/101206887/101220786/101206620/101205555/101202739/101219631/101220704/101215513	LOC101215219/LOC101206887/LOC101220786/LOC101206620/LOC101205555/LOC101202739/LOC101219631/LOC101220704/LOC101215513	9	1	101219631	8	101215219/101206887/101220786/101206620/101205555/101202739/101220704/101215513
BP	GO:0046390	ribose phosphate biosynthetic process	9/514	60/6219	0.0562699	0.323314	101215219/101206887/101220786/101206620/101205555/101202739/101219631/101220704/101215513	LOC101215219/LOC101206887/LOC101220786/LOC101206620/LOC101205555/LOC101202739/LOC101219631/LOC101220704/LOC101215513	9	1	101219631	8	101215219/101206887/101220786/101206620/101205555/101202739/101220704/101215513
BP	GO:0043436	oxoacid metabolic process	26/514	231/6219	0.063886	0.337052	101207177/101215219/116406341/101217359/101206887/101203441/101208329/101220786/101212295/101203129/101206620/101210547/101210955/101218433/101216256/101202739/101222636/101214714/101219631/101220704/101210295/101215982/101214523/101220233/101215513/101211723	LOC101207177/LOC101215219/LOC116406341/LOC101217359/LOC101206887/LOC101203441/LOC101208329/LOC101220786/LOC101212295/LOC101203129/LOC101206620/LOC101210547/LOC101210955/LOC101218433/PPC3/LOC101202739/LOC101222636/LOC101214714/LOC101219631/LOC101220704/LOC101210295/LOC101215982/LOC101214523/LOC101220233/LOC101215513/LOC101211723	26	8	116406341/101210547/101214714/101219631/101210295/101215982/101214523/101220233	18	101207177/101215219/101217359/101206887/101203441/101208329/101220786/101212295/101203129/101206620/101210955/101218433/101216256/101202739/101222636/101220704/101215513/101211723
BP	GO:0000160	phosphorelay signal transduction system	6/514	35/6219	0.064412	0.337052	101203265/101210765/101215069/101217761/101209777/101213011	LOC101203265/LOC101210765/LOC101215069/LOC101217761/LOC101209777/LOC101213011	6	1	101210765	5	101203265/101215069/101217761/101209777/101213011
BP	GO:1901575	organic substance catabolic process	17/514	139/6219	0.0649838	0.337052	101215219/105434867/101222731/101206887/101221739/101220786/101206620/101222005/101203653/101215456/101202739/101219631/101213455/116406046/101220704/101209121/101215513	LOC101215219/LOC105434867/LOC101222731/LOC101206887/LOC101221739/LOC101220786/LOC101206620/LOC101222005/LOC101203653/LOC101215456/LOC101202739/LOC101219631/LOC101213455/LOC116406046/LOC101220704/LOC101209121/LOC101215513	17	7	105434867/101222731/101222005/101215456/101219631/116406046/101209121	10	101215219/101206887/101221739/101220786/101206620/101203653/101202739/101213455/101220704/101215513
BP	GO:0006164	purine nucleotide biosynthetic process	9/514	62/6219	0.0668511	0.337052	101215219/101206887/101220786/101206620/101205555/101202739/101219631/101220704/101215513	LOC101215219/LOC101206887/LOC101220786/LOC101206620/LOC101205555/LOC101202739/LOC101219631/LOC101220704/LOC101215513	9	1	101219631	8	101215219/101206887/101220786/101206620/101205555/101202739/101220704/101215513
BP	GO:0016053	organic acid biosynthetic process	16/514	130/6219	0.0686925	0.337052	101207177/101215219/101217359/101206887/101203441/101220786/101203129/101206620/101210955/101218433/101202739/101222636/101219631/101220704/101215982/101215513	LOC101207177/LOC101215219/LOC101217359/LOC101206887/LOC101203441/LOC101220786/LOC101203129/LOC101206620/LOC101210955/LOC101218433/LOC101202739/LOC101222636/LOC101219631/LOC101220704/LOC101215982/LOC101215513	16	2	101219631/101215982	14	101207177/101215219/101217359/101206887/101203441/101220786/101203129/101206620/101210955/101218433/101202739/101222636/101220704/101215513
BP	GO:0046394	carboxylic acid biosynthetic process	16/514	130/6219	0.0686925	0.337052	101207177/101215219/101217359/101206887/101203441/101220786/101203129/101206620/101210955/101218433/101202739/101222636/101219631/101220704/101215982/101215513	LOC101207177/LOC101215219/LOC101217359/LOC101206887/LOC101203441/LOC101220786/LOC101203129/LOC101206620/LOC101210955/LOC101218433/LOC101202739/LOC101222636/LOC101219631/LOC101220704/LOC101215982/LOC101215513	16	2	101219631/101215982	14	101207177/101215219/101217359/101206887/101203441/101220786/101203129/101206620/101210955/101218433/101202739/101222636/101220704/101215513
BP	GO:0006333	chromatin assembly or disassembly	3/514	12/6219	0.0704049	0.337052	101205383/101205007/101205659	LOC101205383/LOC101205007/LOC101205659	3	2	101205007/101205659	1	101205383
BP	GO:0006073	cellular glucan metabolic process	10/514	72/6219	0.07061	0.337052	101213219/101213462/101217842/101221682/101205724/101208641/101209366/101211777/101214061/101217992	LOC101213219/LOC101213462/XTH3/LOC101221682/LOC101205724/LOC101208641/LOC101209366/LOC101211777/LOC101214061/LOC101217992	10	5	101213219/101213462/101217842/101208641/101211777	5	101221682/101205724/101209366/101214061/101217992
BP	GO:0044042	glucan metabolic process	10/514	72/6219	0.07061	0.337052	101213219/101213462/101217842/101221682/101205724/101208641/101209366/101211777/101214061/101217992	LOC101213219/LOC101213462/XTH3/LOC101221682/LOC101205724/LOC101208641/LOC101209366/LOC101211777/LOC101214061/LOC101217992	10	5	101213219/101213462/101217842/101208641/101211777	5	101221682/101205724/101209366/101214061/101217992
BP	GO:0044264	cellular polysaccharide metabolic process	10/514	72/6219	0.07061	0.337052	101213219/101213462/101217842/101221682/101205724/101208641/101209366/101211777/101214061/101217992	LOC101213219/LOC101213462/XTH3/LOC101221682/LOC101205724/LOC101208641/LOC101209366/LOC101211777/LOC101214061/LOC101217992	10	5	101213219/101213462/101217842/101208641/101211777	5	101221682/101205724/101209366/101214061/101217992
BP	GO:0009126	purine nucleoside monophosphate metabolic process	9/514	63/6219	0.0725805	0.337052	101215219/101206887/101220786/101206620/101205555/101202739/101219631/101220704/101215513	LOC101215219/LOC101206887/LOC101220786/LOC101206620/LOC101205555/LOC101202739/LOC101219631/LOC101220704/LOC101215513	9	1	101219631	8	101215219/101206887/101220786/101206620/101205555/101202739/101220704/101215513
BP	GO:0009161	ribonucleoside monophosphate metabolic process	9/514	63/6219	0.0725805	0.337052	101215219/101206887/101220786/101206620/101205555/101202739/101219631/101220704/101215513	LOC101215219/LOC101206887/LOC101220786/LOC101206620/LOC101205555/LOC101202739/LOC101219631/LOC101220704/LOC101215513	9	1	101219631	8	101215219/101206887/101220786/101206620/101205555/101202739/101220704/101215513
BP	GO:0009167	purine ribonucleoside monophosphate metabolic process	9/514	63/6219	0.0725805	0.337052	101215219/101206887/101220786/101206620/101205555/101202739/101219631/101220704/101215513	LOC101215219/LOC101206887/LOC101220786/LOC101206620/LOC101205555/LOC101202739/LOC101219631/LOC101220704/LOC101215513	9	1	101219631	8	101215219/101206887/101220786/101206620/101205555/101202739/101220704/101215513
BP	GO:0072522	purine-containing compound biosynthetic process	9/514	63/6219	0.0725805	0.337052	101215219/101206887/101220786/101206620/101205555/101202739/101219631/101220704/101215513	LOC101215219/LOC101206887/LOC101220786/LOC101206620/LOC101205555/LOC101202739/LOC101219631/LOC101220704/LOC101215513	9	1	101219631	8	101215219/101206887/101220786/101206620/101205555/101202739/101220704/101215513
BP	GO:0044283	small molecule biosynthetic process	19/514	162/6219	0.0747278	0.342334	101207177/101215219/101217359/101207441/101206887/101203441/101220786/101203129/101206620/101210955/101218433/101206917/101215456/101202739/101222636/101219631/101220704/101215982/101215513	LOC101207177/LOC101215219/LOC101217359/LOC101207441/LOC101206887/LOC101203441/LOC101220786/LOC101203129/LOC101206620/LOC101210955/LOC101218433/LOC101206917/LOC101215456/LOC101202739/LOC101222636/LOC101219631/LOC101220704/LOC101215982/LOC101215513	19	5	101207441/101206917/101215456/101219631/101215982	14	101207177/101215219/101217359/101206887/101203441/101220786/101203129/101206620/101210955/101218433/101202739/101222636/101220704/101215513
BP	GO:0009123	nucleoside monophosphate metabolic process	9/514	64/6219	0.078605	0.355295	101215219/101206887/101220786/101206620/101205555/101202739/101219631/101220704/101215513	LOC101215219/LOC101206887/LOC101220786/LOC101206620/LOC101205555/LOC101202739/LOC101219631/LOC101220704/LOC101215513	9	1	101219631	8	101215219/101206887/101220786/101206620/101205555/101202739/101220704/101215513
BP	GO:0019752	carboxylic acid metabolic process	25/514	226/6219	0.080025	0.356954	101207177/101215219/116406341/101217359/101206887/101203441/101208329/101220786/101212295/101203129/101206620/101210547/101210955/101218433/101216256/101202739/101222636/101219631/101220704/101210295/101215982/101214523/101220233/101215513/101211723	LOC101207177/LOC101215219/LOC116406341/LOC101217359/LOC101206887/LOC101203441/LOC101208329/LOC101220786/LOC101212295/LOC101203129/LOC101206620/LOC101210547/LOC101210955/LOC101218433/PPC3/LOC101202739/LOC101222636/LOC101219631/LOC101220704/LOC101210295/LOC101215982/LOC101214523/LOC101220233/LOC101215513/LOC101211723	25	7	116406341/101210547/101219631/101210295/101215982/101214523/101220233	18	101207177/101215219/101217359/101206887/101203441/101208329/101220786/101212295/101203129/101206620/101210955/101218433/101216256/101202739/101222636/101220704/101215513/101211723
BP	GO:0009144	purine nucleoside triphosphate metabolic process	9/514	65/6219	0.0849253	0.359871	101215219/101206887/101220786/101206620/101205555/101202739/101219631/101220704/101215513	LOC101215219/LOC101206887/LOC101220786/LOC101206620/LOC101205555/LOC101202739/LOC101219631/LOC101220704/LOC101215513	9	1	101219631	8	101215219/101206887/101220786/101206620/101205555/101202739/101220704/101215513
BP	GO:0009199	ribonucleoside triphosphate metabolic process	9/514	65/6219	0.0849253	0.359871	101215219/101206887/101220786/101206620/101205555/101202739/101219631/101220704/101215513	LOC101215219/LOC101206887/LOC101220786/LOC101206620/LOC101205555/LOC101202739/LOC101219631/LOC101220704/LOC101215513	9	1	101219631	8	101215219/101206887/101220786/101206620/101205555/101202739/101220704/101215513
BP	GO:0009205	purine ribonucleoside triphosphate metabolic process	9/514	65/6219	0.0849253	0.359871	101215219/101206887/101220786/101206620/101205555/101202739/101219631/101220704/101215513	LOC101215219/LOC101206887/LOC101220786/LOC101206620/LOC101205555/LOC101202739/LOC101219631/LOC101220704/LOC101215513	9	1	101219631	8	101215219/101206887/101220786/101206620/101205555/101202739/101220704/101215513
BP	GO:0034637	cellular carbohydrate biosynthetic process	9/514	65/6219	0.0849253	0.359871	116403226/101213219/101213462/101207441/101205724/101211097/101211777/101214061/101212172	LOC116403226/LOC101213219/LOC101213462/LOC101207441/LOC101205724/LOC101211097/LOC101211777/LOC101214061/LOC101212172	9	4	101213219/101213462/101207441/101211777	5	116403226/101205724/101211097/101214061/101212172
BP	GO:0009311	oligosaccharide metabolic process	5/514	29/6219	0.0861948	0.360741	116403226/101221022/101211461/101211097/101212172	LOC116403226/LOC101221022/LOC101211461/LOC101211097/LOC101212172	5	0		5	116403226/101221022/101211461/101211097/101212172
BP	GO:0009141	nucleoside triphosphate metabolic process	9/514	66/6219	0.0915411	0.378444	101215219/101206887/101220786/101206620/101205555/101202739/101219631/101220704/101215513	LOC101215219/LOC101206887/LOC101220786/LOC101206620/LOC101205555/LOC101202739/LOC101219631/LOC101220704/LOC101215513	9	1	101219631	8	101215219/101206887/101220786/101206620/101205555/101202739/101220704/101215513
BP	GO:0009108	coenzyme biosynthetic process	8/514	59/6219	0.110545	0.451505	101215219/101206887/101220786/101206620/101202739/101219631/101220704/101215513	LOC101215219/LOC101206887/LOC101220786/LOC101206620/LOC101202739/LOC101219631/LOC101220704/LOC101215513	8	1	101219631	7	101215219/101206887/101220786/101206620/101202739/101220704/101215513
BP	GO:0005992	trehalose biosynthetic process	3/514	15/6219	0.121385	0.489874	116403226/101211097/101212172	LOC116403226/LOC101211097/LOC101212172	3	0		3	116403226/101211097/101212172
BP	GO:0009451	RNA modification	5/514	33/6219	0.132152	0.527053	101203320/101211896/101206917/101204210/101219631	LOC101203320/LOC101211896/LOC101206917/LOC101204210/LOC101219631	5	3	101211896/101206917/101219631	2	101203320/101204210
BP	GO:0007017	microtubule-based process	8/514	62/6219	0.136567	0.53833	101218717/101204935/101214929/101221926/101206252/101212819/101215425/101203593	LOC101218717/LOC101204935/LOC101214929/LOC101221926/LOC101206252/LOC101212819/LOC101215425/LOC101203593	8	0		8	101218717/101204935/101214929/101221926/101206252/101212819/101215425/101203593
BP	GO:0005991	trehalose metabolic process	3/514	16/6219	0.140695	0.548224	116403226/101211097/101212172	LOC116403226/LOC101211097/LOC101212172	3	0		3	116403226/101211097/101212172
BP	GO:0006352	DNA-templated transcription, initiation	4/514	25/6219	0.146855	0.565726	101207693/101207528/101208584/101216807	LOC101207693/LOC101207528/LOC101208584/LOC101216807	4	2	101207693/101216807	2	101207528/101208584
BP	GO:0016051	carbohydrate biosynthetic process	9/514	74/6219	0.154821	0.58971	116403226/101213219/101213462/101207441/101205724/101211097/101211777/101214061/101212172	LOC116403226/LOC101213219/LOC101213462/LOC101207441/LOC101205724/LOC101211097/LOC101211777/LOC101214061/LOC101212172	9	4	101213219/101213462/101207441/101211777	5	116403226/101205724/101211097/101214061/101212172
BP	GO:0030243	cellulose metabolic process	5/514	35/6219	0.158523	0.590541	101213219/101213462/101205724/101211777/101214061	LOC101213219/LOC101213462/LOC101205724/LOC101211777/LOC101214061	5	3	101213219/101213462/101211777	2	101205724/101214061
BP	GO:0030244	cellulose biosynthetic process	5/514	35/6219	0.158523	0.590541	101213219/101213462/101205724/101211777/101214061	LOC101213219/LOC101213462/LOC101205724/LOC101211777/LOC101214061	5	3	101213219/101213462/101211777	2	101205724/101214061
BP	GO:0046351	disaccharide biosynthetic process	3/514	17/6219	0.160945	0.593047	116403226/101211097/101212172	LOC116403226/LOC101211097/LOC101212172	3	0		3	116403226/101211097/101212172
BP	GO:0042545	cell wall modification	5/514	36/6219	0.172453	0.618555	101205557/101220821/101217414/101217635/101212388	LOC101205557/LOC101220821/LOC101217414/LOC101217635/LOC101212388	5	2	101220821/101212388	3	101205557/101217414/101217635
BP	GO:0009165	nucleotide biosynthetic process	9/514	76/6219	0.173341	0.618555	101215219/101206887/101220786/101206620/101205555/101202739/101219631/101220704/101215513	LOC101215219/LOC101206887/LOC101220786/LOC101206620/LOC101205555/LOC101202739/LOC101219631/LOC101220704/LOC101215513	9	1	101219631	8	101215219/101206887/101220786/101206620/101205555/101202739/101220704/101215513
BP	GO:1901293	nucleoside phosphate biosynthetic process	9/514	76/6219	0.173341	0.618555	101215219/101206887/101220786/101206620/101205555/101202739/101219631/101220704/101215513	LOC101215219/LOC101206887/LOC101220786/LOC101206620/LOC101205555/LOC101202739/LOC101219631/LOC101220704/LOC101215513	9	1	101219631	8	101215219/101206887/101220786/101206620/101205555/101202739/101220704/101215513
BP	GO:0051726	regulation of cell cycle	3/514	18/6219	0.182004	0.638111	101212888/101213265/101215012	LOC101212888/LOC101213265/LOC101215012	3	2	101213265/101215012	1	101212888
BP	GO:0017144	drug metabolic process	12/514	109/6219	0.187503	0.638111	101215219/101222731/101206887/101208329/101220786/101206620/101216256/101205555/101202739/101219631/101220704/101215513	LOC101215219/LOC101222731/LOC101206887/LOC101208329/LOC101220786/LOC101206620/PPC3/LOC101205555/LOC101202739/LOC101219631/LOC101220704/LOC101215513	12	2	101222731/101219631	10	101215219/101206887/101208329/101220786/101206620/101216256/101205555/101202739/101220704/101215513
BP	GO:0009150	purine ribonucleotide metabolic process	9/514	78/6219	0.192829	0.638111	101215219/101206887/101220786/101206620/101205555/101202739/101219631/101220704/101215513	LOC101215219/LOC101206887/LOC101220786/LOC101206620/LOC101205555/LOC101202739/LOC101219631/LOC101220704/LOC101215513	9	1	101219631	8	101215219/101206887/101220786/101206620/101205555/101202739/101220704/101215513
BP	GO:0009259	ribonucleotide metabolic process	9/514	78/6219	0.192829	0.638111	101215219/101206887/101220786/101206620/101205555/101202739/101219631/101220704/101215513	LOC101215219/LOC101206887/LOC101220786/LOC101206620/LOC101205555/LOC101202739/LOC101219631/LOC101220704/LOC101215513	9	1	101219631	8	101215219/101206887/101220786/101206620/101205555/101202739/101220704/101215513
BP	GO:0006334	nucleosome assembly	2/514	10/6219	0.197645	0.638111	101205007/101205659	LOC101205007/LOC101205659	2	2	101205007/101205659	0
BP	GO:0006367	transcription initiation from RNA polymerase II promoter	2/514	10/6219	0.197645	0.638111	101207693/101207528	LOC101207693/LOC101207528	2	1	101207693	1	101207528
BP	GO:0009067	aspartate family amino acid biosynthetic process	2/514	10/6219	0.197645	0.638111	101203129/101222636	LOC101203129/LOC101222636	2	0		2	101203129/101222636
BP	GO:0031497	chromatin assembly	2/514	10/6219	0.197645	0.638111	101205007/101205659	LOC101205007/LOC101205659	2	2	101205007/101205659	0
BP	GO:0034728	nucleosome organization	2/514	10/6219	0.197645	0.638111	101205007/101205659	LOC101205007/LOC101205659	2	2	101205007/101205659	0
BP	GO:0050790	regulation of catalytic activity	2/514	10/6219	0.197645	0.638111	101212888/101206928	LOC101212888/LOC101206928	2	1	101206928	1	101212888
BP	GO:0006260	DNA replication	6/514	48/6219	0.201931	0.645799	101210889/101217274/101211850/101208568/101211021/101211201	LOC101210889/LOC101217274/LOC101211850/LOC101208568/LOC101211021/LOC101211201	6	1	101211201	5	101210889/101217274/101211850/101208568/101211021
BP	GO:0006163	purine nucleotide metabolic process	9/514	80/6219	0.213209	0.675495	101215219/101206887/101220786/101206620/101205555/101202739/101219631/101220704/101215513	LOC101215219/LOC101206887/LOC101220786/LOC101206620/LOC101205555/LOC101202739/LOC101219631/LOC101220704/LOC101215513	9	1	101219631	8	101215219/101206887/101220786/101206620/101205555/101202739/101220704/101215513
BP	GO:0006732	coenzyme metabolic process	8/514	70/6219	0.218909	0.680826	101215219/101206887/101220786/101206620/101202739/101219631/101220704/101215513	LOC101215219/LOC101206887/LOC101220786/LOC101206620/LOC101202739/LOC101219631/LOC101220704/LOC101215513	8	1	101219631	7	101215219/101206887/101220786/101206620/101202739/101220704/101215513
BP	GO:0051188	cofactor biosynthetic process	8/514	70/6219	0.218909	0.680826	101215219/101206887/101220786/101206620/101202739/101219631/101220704/101215513	LOC101215219/LOC101206887/LOC101220786/LOC101206620/LOC101202739/LOC101219631/LOC101220704/LOC101215513	8	1	101219631	7	101215219/101206887/101220786/101206620/101202739/101220704/101215513
BP	GO:0090407	organophosphate biosynthetic process	12/514	113/6219	0.221771	0.681243	101215219/101207441/101206887/101220786/101207886/101212295/101206620/101205555/101202739/101219631/101220704/101215513	LOC101215219/LOC101207441/LOC101206887/LOC101220786/LOC101207886/LOC101212295/LOC101206620/LOC101205555/LOC101202739/LOC101219631/LOC101220704/LOC101215513	12	3	101207441/101207886/101219631	9	101215219/101206887/101220786/101212295/101206620/101205555/101202739/101220704/101215513
BP	GO:0072521	purine-containing compound metabolic process	9/514	81/6219	0.223709	0.681243	101215219/101206887/101220786/101206620/101205555/101202739/101219631/101220704/101215513	LOC101215219/LOC101206887/LOC101220786/LOC101206620/LOC101205555/LOC101202739/LOC101219631/LOC101220704/LOC101215513	9	1	101219631	8	101215219/101206887/101220786/101206620/101205555/101202739/101220704/101215513
BP	GO:0071103	DNA conformation change	3/514	20/6219	0.226039	0.681243	101215950/101205007/101205659	LOC101215950/LOC101205007/LOC101205659	3	2	101205007/101205659	1	101215950
BP	GO:0006323	DNA packaging	2/514	11/6219	0.22909	0.681243	101205007/101205659	LOC101205007/LOC101205659	2	2	101205007/101205659	0
BP	GO:0009066	aspartate family amino acid metabolic process	2/514	11/6219	0.22909	0.681243	101203129/101222636	LOC101203129/LOC101222636	2	0		2	101203129/101222636
BP	GO:0007154	cell communication	21/514	214/6219	0.233593	0.687864	101203265/101210765/101215069/101214053/101217761/101219868/116402699/101205786/101215697/101209542/101208639/101206275/101217751/101209777/101217735/101213011/116406348/101204001/101212682/105435875/101203531	LOC101203265/LOC101210765/LOC101215069/LOC101214053/LOC101217761/LOC101219868/LOC116402699/CS-ERS/LOC101215697/LOC101209542/LOC101208639/LOC101206275/LOC101217751/LOC101209777/LOC101217735/LOC101213011/LOC116406348/LOC101204001/LOC101212682/LOC105435875/LOC101203531	21	4	101210765/101219868/101217735/101203531	17	101203265/101215069/101214053/101217761/116402699/101205786/101215697/101209542/101208639/101206275/101217751/101209777/101213011/116406348/101204001/101212682/105435875
BP	GO:0007165	signal transduction	18/514	181/6219	0.237404	0.687864	101203265/101210765/101215069/101214053/101217761/101219868/101205786/101209542/101208639/101206275/101209777/101217735/101213011/116406348/101204001/101212682/105435875/101203531	LOC101203265/LOC101210765/LOC101215069/LOC101214053/LOC101217761/LOC101219868/CS-ERS/LOC101209542/LOC101208639/LOC101206275/LOC101209777/LOC101217735/LOC101213011/LOC116406348/LOC101204001/LOC101212682/LOC105435875/LOC101203531	18	4	101210765/101219868/101217735/101203531	14	101203265/101215069/101214053/101217761/101205786/101209542/101208639/101206275/101209777/101213011/116406348/101204001/101212682/105435875
BP	GO:0023052	signaling	18/514	181/6219	0.237404	0.687864	101203265/101210765/101215069/101214053/101217761/101219868/101205786/101209542/101208639/101206275/101209777/101217735/101213011/116406348/101204001/101212682/105435875/101203531	LOC101203265/LOC101210765/LOC101215069/LOC101214053/LOC101217761/LOC101219868/CS-ERS/LOC101209542/LOC101208639/LOC101206275/LOC101209777/LOC101217735/LOC101213011/LOC116406348/LOC101204001/LOC101212682/LOC105435875/LOC101203531	18	4	101210765/101219868/101217735/101203531	14	101203265/101215069/101214053/101217761/101205786/101209542/101208639/101206275/101209777/101213011/116406348/101204001/101212682/105435875
BP	GO:0009312	oligosaccharide biosynthetic process	3/514	21/6219	0.248769	0.714683	116403226/101211097/101212172	LOC116403226/LOC101211097/LOC101212172	3	0		3	116403226/101211097/101212172
BP	GO:0019693	ribose phosphate metabolic process	9/514	84/6219	0.256316	0.718866	101215219/101206887/101220786/101206620/101205555/101202739/101219631/101220704/101215513	LOC101215219/LOC101206887/LOC101220786/LOC101206620/LOC101205555/LOC101202739/LOC101219631/LOC101220704/LOC101215513	9	1	101219631	8	101215219/101206887/101220786/101206620/101205555/101202739/101220704/101215513
BP	GO:0015980	energy derivation by oxidation of organic compounds	2/514	12/6219	0.260828	0.718866	101208329/101216256	LOC101208329/PPC3	2	0		2	101208329/101216256
BP	GO:0045333	cellular respiration	2/514	12/6219	0.260828	0.718866	101208329/101216256	LOC101208329/PPC3	2	0		2	101208329/101216256
BP	GO:0065004	protein-DNA complex assembly	2/514	12/6219	0.260828	0.718866	101205007/101205659	LOC101205007/LOC101205659	2	2	101205007/101205659	0
BP	GO:0071824	protein-DNA complex subunit organization	2/514	12/6219	0.260828	0.718866	101205007/101205659	LOC101205007/LOC101205659	2	2	101205007/101205659	0
BP	GO:0030001	metal ion transport	11/514	107/6219	0.268333	0.732071	101208367/101218801/101208405/101219619/101221552/101208608/101216875/101208339/101219496/101218141/101209937	LOC101208367/HMA5.2/LOC101208405/LOC101219619/LOC101221552/LOC101208608/LOC101216875/LOC101208339/LOC101219496/LOC101218141/LOC101209937	11	9	101208367/101218801/101208405/101219619/101208608/101216875/101208339/101219496/101209937	2	101221552/101218141
BP	GO:0007049	cell cycle	4/514	32/6219	0.269938	0.732071	101212888/101213265/101204120/101215012	LOC101212888/LOC101213265/LOC101204120/LOC101215012	4	2	101213265/101215012	2	101212888/101204120
BP	GO:0055086	nucleobase-containing small molecule metabolic process	12/514	119/6219	0.277461	0.746503	101215219/101206887/101220786/101218731/101206620/101206917/101215456/101205555/101202739/101219631/101220704/101215513	LOC101215219/LOC101206887/LOC101220786/LOC101218731/LOC101206620/LOC101206917/LOC101215456/LOC101205555/LOC101202739/LOC101219631/LOC101220704/LOC101215513	12	3	101206917/101215456/101219631	9	101215219/101206887/101220786/101218731/101206620/101205555/101202739/101220704/101215513
BP	GO:0006950	response to stress	25/514	268/6219	0.289991	0.757171	101207890/116403755/101221822/101212424/101203607/101211231/101215838/101217543/116403708/105436210/101221151/101206213/101203032/101207497/101220266/101218928/101209055/101205729/101218397/101212923/101217567/101211021/101221560/101217781/101204819	LOC101207890/LOC116403755/LOC101221822/LOC101212424/LOC101203607/LOC101211231/LOC101215838/LOC101217543/LOC116403708/LOC105436210/LOC101221151/LOC101206213/LOC101203032/LOC101207497/LOC101220266/LOC101218928/LOC101209055/LOC101205729/LOC101218397/LOC101212923/LOC101217567/LOC101211021/LOC101221560/LOC101217781/LOC101204819	25	5	116403755/101215838/101206213/101209055/101212923	20	101207890/101221822/101212424/101203607/101211231/101217543/116403708/105436210/101221151/101203032/101207497/101220266/101218928/101205729/101218397/101217567/101211021/101221560/101217781/101204819
BP	GO:0006022	aminoglycan metabolic process	2/514	13/6219	0.292594	0.757171	101222731/101212638	LOC101222731/LOC101212638	2	2	101222731/101212638	0
BP	GO:0006081	cellular aldehyde metabolic process	2/514	13/6219	0.292594	0.757171	101212295/101214523	LOC101212295/LOC101214523	2	1	101214523	1	101212295
BP	GO:0032268	regulation of cellular protein metabolic process	2/514	13/6219	0.292594	0.757171	101212888/101213295	LOC101212888/LOC101213295	2	0		2	101212888/101213295
BP	GO:0065009	regulation of molecular function	2/514	13/6219	0.292594	0.757171	101212888/101206928	LOC101212888/LOC101206928	2	1	101206928	1	101212888
BP	GO:1901137	carbohydrate derivative biosynthetic process	12/514	121/6219	0.296957	0.762639	101215219/101206887/101220786/101206620/101206917/101205555/101202739/101219631/101220704/101222690/101215513/101212638	LOC101215219/LOC101206887/LOC101220786/LOC101206620/LOC101206917/LOC101205555/LOC101202739/LOC101219631/LOC101220704/LOC101222690/LOC101215513/LOC101212638	12	3	101206917/101219631/101212638	9	101215219/101206887/101220786/101206620/101205555/101202739/101220704/101222690/101215513
BP	GO:0000271	polysaccharide biosynthetic process	5/514	45/6219	0.313711	0.77114	101213219/101213462/101205724/101211777/101214061	LOC101213219/LOC101213462/LOC101205724/LOC101211777/LOC101214061	5	3	101213219/101213462/101211777	2	101205724/101214061
BP	GO:0009250	glucan biosynthetic process	5/514	45/6219	0.313711	0.77114	101213219/101213462/101205724/101211777/101214061	LOC101213219/LOC101213462/LOC101205724/LOC101211777/LOC101214061	5	3	101213219/101213462/101211777	2	101205724/101214061
BP	GO:0033692	cellular polysaccharide biosynthetic process	5/514	45/6219	0.313711	0.77114	101213219/101213462/101205724/101211777/101214061	LOC101213219/LOC101213462/LOC101205724/LOC101211777/LOC101214061	5	3	101213219/101213462/101211777	2	101205724/101214061
BP	GO:0051273	beta-glucan metabolic process	5/514	45/6219	0.313711	0.77114	101213219/101213462/101205724/101211777/101214061	LOC101213219/LOC101213462/LOC101205724/LOC101211777/LOC101214061	5	3	101213219/101213462/101211777	2	101205724/101214061
BP	GO:0051274	beta-glucan biosynthetic process	5/514	45/6219	0.313711	0.77114	101213219/101213462/101205724/101211777/101214061	LOC101213219/LOC101213462/LOC101205724/LOC101211777/LOC101214061	5	3	101213219/101213462/101211777	2	101205724/101214061
BP	GO:0015711	organic anion transport	3/514	24/6219	0.318465	0.77114	101211429/101218761/101217853	LOC101211429/LOC101218761/LOC101217853	3	3	101211429/101218761/101217853	0
BP	GO:0015849	organic acid transport	3/514	24/6219	0.318465	0.77114	101211429/101218761/101217853	LOC101211429/LOC101218761/LOC101217853	3	3	101211429/101218761/101217853	0
BP	GO:0046942	carboxylic acid transport	3/514	24/6219	0.318465	0.77114	101211429/101218761/101217853	LOC101211429/LOC101218761/LOC101217853	3	3	101211429/101218761/101217853	0
BP	GO:0022402	cell cycle process	2/514	14/6219	0.324168	0.779384	101213265/101215012	LOC101213265/LOC101215012	2	2	101213265/101215012	0
BP	GO:0006811	ion transport	24/514	262/6219	0.327464	0.781762	101202870/101208367/101222356/101211429/101218761/101218801/116403192/101210964/101209987/101203205/101208405/101217853/101213983/101219619/101221552/101208346/101205555/101219163/101208608/101216875/101208339/101219496/101218141/101209937	LOC101202870/LOC101208367/LOC101222356/LOC101211429/LOC101218761/HMA5.2/LOC116403192/LOC101210964/LOC101209987/LOC101203205/LOC101208405/LOC101217853/LOC101213983/LOC101219619/LOC101221552/LOC101208346/LOC101205555/LOC101219163/LOC101208608/LOC101216875/LOC101208339/LOC101219496/LOC101218141/LOC101209937	24	16	101208367/101211429/101218761/101218801/101209987/101208405/101217853/101213983/101219619/101208346/101219163/101208608/101216875/101208339/101219496/101209937	8	101202870/101222356/116403192/101210964/101203205/101221552/101205555/101218141
BP	GO:0009117	nucleotide metabolic process	10/514	102/6219	0.333932	0.791628	101215219/101206887/101220786/101206620/101215456/101205555/101202739/101219631/101220704/101215513	LOC101215219/LOC101206887/LOC101220786/LOC101206620/LOC101215456/LOC101205555/LOC101202739/LOC101219631/LOC101220704/LOC101215513	10	2	101215456/101219631	8	101215219/101206887/101220786/101206620/101205555/101202739/101220704/101215513
BP	GO:0048519	negative regulation of biological process	3/514	25/6219	0.341866	0.803127	101210625/101213265/101215012	LOC101210625/LOC101213265/LOC101215012	3	3	101210625/101213265/101215012	0
BP	GO:0006753	nucleoside phosphate metabolic process	10/514	103/6219	0.345185	0.803127	101215219/101206887/101220786/101206620/101215456/101205555/101202739/101219631/101220704/101215513	LOC101215219/LOC101206887/LOC101220786/LOC101206620/LOC101215456/LOC101205555/LOC101202739/LOC101219631/LOC101220704/LOC101215513	10	2	101215456/101219631	8	101215219/101206887/101220786/101206620/101205555/101202739/101220704/101215513
BP	GO:0051704	multi-organism process	4/514	36/6219	0.3468	0.803127	116402699/101207511/101215697/101217751	LOC116402699/LOC101207511/LOC101215697/LOC101217751	4	0		4	116402699/101207511/101215697/101217751
BP	GO:0044272	sulfur compound biosynthetic process	2/514	15/6219	0.355366	0.803127	101203129/101222636	LOC101203129/LOC101222636	2	0		2	101203129/101222636
BP	GO:0048523	negative regulation of cellular process	2/514	15/6219	0.355366	0.803127	101213265/101215012	LOC101213265/LOC101215012	2	2	101213265/101215012	0
BP	GO:0051246	regulation of protein metabolic process	2/514	15/6219	0.355366	0.803127	101212888/101213295	LOC101212888/LOC101213295	2	0		2	101212888/101213295
BP	GO:1901136	carbohydrate derivative catabolic process	2/514	15/6219	0.355366	0.803127	101222731/101215456	LOC101222731/LOC101215456	2	2	101222731/101215456	0
BP	GO:0045229	external encapsulating structure organization	5/514	48/6219	0.364258	0.809178	101205557/101220821/101217414/101217635/101212388	LOC101205557/LOC101220821/LOC101217414/LOC101217635/LOC101212388	5	2	101220821/101212388	3	101205557/101217414/101217635
BP	GO:0071555	cell wall organization	5/514	48/6219	0.364258	0.809178	101205557/101220821/101217414/101217635/101212388	LOC101205557/LOC101220821/LOC101217414/LOC101217635/LOC101212388	5	2	101220821/101212388	3	101205557/101217414/101217635
BP	GO:0006325	chromatin organization	3/514	26/6219	0.365204	0.809178	101205383/101205007/101205659	LOC101205383/LOC101205007/LOC101205659	3	2	101205007/101205659	1	101205383
BP	GO:0006413	translational initiation	2/514	16/6219	0.386033	0.845406	101219651/101214334	LOC101219651/LOC101214334	2	2	101219651/101214334	0
BP	GO:0009308	amine metabolic process	3/514	27/6219	0.3884	0.845406	101213059/101212818/101210998	LOC101213059/LOC101212818/LOC101210998	3	3	101213059/101212818/101210998	0
BP	GO:0071554	cell wall organization or biogenesis	6/514	61/6219	0.391522	0.845406	101205557/101220821/101222731/101217414/101217635/101212388	LOC101205557/LOC101220821/LOC101222731/LOC101217414/LOC101217635/LOC101212388	6	3	101220821/101222731/101212388	3	101205557/101217414/101217635
BP	GO:1901135	carbohydrate derivative metabolic process	16/514	177/6219	0.39153	0.845406	101215219/101222731/101206887/101220786/101212295/101218731/101206620/101206917/101215456/101205555/101202739/101219631/101220704/101222690/101215513/101212638	LOC101215219/LOC101222731/LOC101206887/LOC101220786/LOC101212295/LOC101218731/LOC101206620/LOC101206917/LOC101215456/LOC101205555/LOC101202739/LOC101219631/LOC101220704/LOC101222690/LOC101215513/LOC101212638	16	5	101222731/101206917/101215456/101219631/101212638	11	101215219/101206887/101220786/101212295/101218731/101206620/101205555/101202739/101220704/101222690/101215513
BP	GO:0044281	small molecule metabolic process	32/514	367/6219	0.400983	0.860336	101207177/101215219/116406341/101217359/101207441/101206887/101203441/101208329/101220786/101212295/101203129/101218731/101206620/101210547/101210955/101218433/101206917/101216256/101215456/101205555/101202739/101222636/101214714/101219631/101220704/101210295/101215982/101205401/101214523/101220233/101215513/101211723	LOC101207177/LOC101215219/LOC116406341/LOC101217359/LOC101207441/LOC101206887/LOC101203441/LOC101208329/LOC101220786/LOC101212295/LOC101203129/LOC101218731/LOC101206620/LOC101210547/LOC101210955/LOC101218433/LOC101206917/PPC3/LOC101215456/LOC101205555/LOC101202739/LOC101222636/LOC101214714/LOC101219631/LOC101220704/LOC101210295/LOC101215982/LOC101205401/LOC101214523/LOC101220233/LOC101215513/LOC1…	32	11	116406341/101207441/101210547/101206917/101215456/101214714/101219631/101210295/101215982/101214523/101220233	21	101207177/101215219/101217359/101206887/101203441/101208329/101220786/101212295/101203129/101218731/101206620/101210955/101218433/101216256/101205555/101202739/101222636/101220704/101205401/101215513/101211723
BP	GO:0006633	fatty acid biosynthetic process	4/514	39/6219	0.404835	0.860574	101217359/101203441/101210955/101218433	LOC101217359/LOC101203441/LOC101210955/LOC101218433	4	0		4	101217359/101203441/101210955/101218433
BP	GO:0051186	cofactor metabolic process	9/514	97/6219	0.409772	0.860574	101215219/101206887/101220786/101206620/101203653/101202739/101219631/101220704/101215513	LOC101215219/LOC101206887/LOC101220786/LOC101206620/LOC101203653/LOC101202739/LOC101219631/LOC101220704/LOC101215513	9	1	101219631	8	101215219/101206887/101220786/101206620/101203653/101202739/101220704/101215513
BP	GO:0008654	phospholipid biosynthetic process	3/514	28/6219	0.411385	0.860574	101207441/101207886/101212295	LOC101207441/LOC101207886/LOC101212295	3	2	101207441/101207886	1	101212295
BP	GO:0006631	fatty acid metabolic process	5/514	51/6219	0.414954	0.860574	101217359/101203441/101210955/101218433/101210295	LOC101217359/LOC101203441/LOC101210955/LOC101218433/LOC101210295	5	1	101210295	4	101217359/101203441/101210955/101218433
BP	GO:0006855	drug transmembrane transport	4/514	40/6219	0.424003	0.860574	101203764/101207199/101203402/101221154	LOC101203764/LOC101207199/LOC101203402/LOC101221154	4	2	101207199/101221154	2	101203764/101203402
BP	GO:0015893	drug transport	4/514	40/6219	0.424003	0.860574	101203764/101207199/101203402/101221154	LOC101203764/LOC101207199/LOC101203402/LOC101221154	4	2	101207199/101221154	2	101203764/101203402
BP	GO:0042493	response to drug	4/514	40/6219	0.424003	0.860574	101203764/101207199/101203402/101221154	LOC101203764/LOC101207199/LOC101203402/LOC101221154	4	2	101207199/101221154	2	101203764/101203402
BP	GO:0035556	intracellular signal transduction	10/514	110/6219	0.425103	0.860574	101203265/101210765/101215069/101217761/101209542/101208639/101209777/101217735/101213011/101212682	LOC101203265/LOC101210765/LOC101215069/LOC101217761/LOC101209542/LOC101208639/LOC101209777/LOC101217735/LOC101213011/LOC101212682	10	2	101210765/101217735	8	101203265/101215069/101217761/101209542/101208639/101209777/101213011/101212682
BP	GO:0008037	cell recognition	3/514	29/6219	0.434095	0.860574	116402699/101215697/101217751	LOC116402699/LOC101215697/LOC101217751	3	0		3	116402699/101215697/101217751
BP	GO:0009856	pollination	3/514	29/6219	0.434095	0.860574	116402699/101215697/101217751	LOC116402699/LOC101215697/LOC101217751	3	0		3	116402699/101215697/101217751
BP	GO:0009875	pollen-pistil interaction	3/514	29/6219	0.434095	0.860574	116402699/101215697/101217751	LOC116402699/LOC101215697/LOC101217751	3	0		3	116402699/101215697/101217751
BP	GO:0044706	multi-multicellular organism process	3/514	29/6219	0.434095	0.860574	116402699/101215697/101217751	LOC116402699/LOC101215697/LOC101217751	3	0		3	116402699/101215697/101217751
BP	GO:0048544	recognition of pollen	3/514	29/6219	0.434095	0.860574	116402699/101215697/101217751	LOC116402699/LOC101215697/LOC101217751	3	0		3	116402699/101215697/101217751
BP	GO:0048522	positive regulation of cellular process	2/514	18/6219	0.4453	0.874231	101213295/101207693	LOC101213295/LOC101207693	2	1	101207693	1	101213295
BP	GO:0042221	response to chemical	9/514	100/6219	0.446141	0.874231	101210406/101205258/101203764/101207199/101203402/101221154/101214812/101217643/105435731	LOC101210406/LOC101205258/LOC101203764/LOC101207199/LOC101203402/LOC101221154/LOC101214812/LOC101217643/LOC105435731	9	3	101207199/101221154/105435731	6	101210406/101205258/101203764/101203402/101214812/101217643
BP	GO:0048518	positive regulation of biological process	2/514	19/6219	0.473718	0.921599	101213295/101207693	LOC101213295/LOC101207693	2	1	101207693	1	101213295
BP	GO:0000003	reproduction	3/514	31/6219	0.47847	0.921599	116402699/101215697/101217751	LOC116402699/LOC101215697/LOC101217751	3	0		3	116402699/101215697/101217751
BP	GO:0022414	reproductive process	3/514	31/6219	0.47847	0.921599	116402699/101215697/101217751	LOC116402699/LOC101215697/LOC101217751	3	0		3	116402699/101215697/101217751
BP	GO:0009057	macromolecule catabolic process	7/514	80/6219	0.495704	0.9494	105434867/101222731/101221739/101222005/101213455/116406046/101209121	LOC105434867/LOC101222731/LOC101221739/LOC101222005/LOC101213455/LOC116406046/LOC101209121	7	5	105434867/101222731/101222005/116406046/101209121	2	101221739/101213455
BP	GO:0006979	response to oxidative stress	6/514	70/6219	0.525609	0.96864	101217543/101221151/101203032/101218397/101217567/101217781	LOC101217543/LOC101221151/LOC101203032/LOC101218397/LOC101217567/LOC101217781	6	0		6	101217543/101221151/101203032/101218397/101217567/101217781
BP	GO:0001522	pseudouridine synthesis	2/514	21/6219	0.527814	0.96864	101203320/101211896	LOC101203320/LOC101211896	2	1	101211896	1	101203320
BP	GO:0051276	chromosome organization	4/514	46/6219	0.534566	0.96864	101205383/101215950/101205007/101205659	LOC101205383/LOC101215950/LOC101205007/LOC101205659	4	2	101205007/101205659	2	101205383/101215950
BP	GO:0006399	tRNA metabolic process	6/514	71/6219	0.539854	0.96864	101210547/101206917/101220274/101219631/101220233/101211723	LOC101210547/LOC101206917/LOC101220274/LOC101219631/LOC101220233/LOC101211723	6	5	101210547/101206917/101220274/101219631/101220233	1	101211723
BP	GO:0008033	tRNA processing	3/514	34/6219	0.541768	0.96864	101206917/101220274/101219631	LOC101206917/LOC101220274/LOC101219631	3	3	101206917/101220274/101219631	0
BP	GO:0006629	lipid metabolic process	20/514	243/6219	0.5432	0.96864	101209094/101217359/101207441/101220288/101203441/116402105/101207886/101212295/101215230/101210904/101210955/101209542/101209735/101218433/101204709/101208651/101210295/101205550/101219958/101206295	LOC101209094/LOC101217359/LOC101207441/LOC101220288/LOC101203441/LOC116402105/LOC101207886/LOC101212295/LOC101215230/LOC101210904/LOC101210955/LOC101209542/LOC101209735/LOC101218433/LOC101204709/LOC101208651/LOC101210295/LOC101205550/LOC101219958/LOC101206295	20	10	101209094/101207441/101220288/116402105/101207886/101215230/101210904/101209735/101204709/101210295	10	101217359/101203441/101212295/101210955/101209542/101218433/101208651/101205550/101219958/101206295
BP	GO:0006457	protein folding	7/514	84/6219	0.548755	0.96864	101207890/101221822/101203607/101212886/101217187/101214200/101206458	LOC101207890/LOC101221822/LOC101203607/LOC101212886/LOC101217187/LOC101214200/LOC101206458	7	2	101217187/101214200	5	101207890/101221822/101203607/101212886/101206458
BP	GO:0019637	organophosphate metabolic process	14/514	171/6219	0.556369	0.96864	101215219/101207441/101206887/101220786/101207886/101212295/101206620/101215456/101205555/101202739/101219631/101220704/101215513/101219958	LOC101215219/LOC101207441/LOC101206887/LOC101220786/LOC101207886/LOC101212295/LOC101206620/LOC101215456/LOC101205555/LOC101202739/LOC101219631/LOC101220704/LOC101215513/LOC101219958	14	4	101207441/101207886/101215456/101219631	10	101215219/101206887/101220786/101212295/101206620/101205555/101202739/101220704/101215513/101219958
BP	GO:0044255	cellular lipid metabolic process	11/514	135/6219	0.566165	0.96864	101217359/101207441/101203441/101207886/101212295/101210955/101218433/101204709/101210295/101205550/101219958	LOC101217359/LOC101207441/LOC101203441/LOC101207886/LOC101212295/LOC101210955/LOC101218433/LOC101204709/LOC101210295/LOC101205550/LOC101219958	11	4	101207441/101207886/101204709/101210295	7	101217359/101203441/101212295/101210955/101218433/101205550/101219958
BP	GO:0048193	Golgi vesicle transport	2/514	23/6219	0.578016	0.96864	101221387/101210035	LOC101221387/LOC101210035	2	1	101221387	1	101210035
BP	GO:0006026	aminoglycan catabolic process	1/514	10/6219	0.578238	0.96864	101222731	LOC101222731	1	1	101222731	0
BP	GO:0006030	chitin metabolic process	1/514	10/6219	0.578238	0.96864	101222731	LOC101222731	1	1	101222731	0
BP	GO:0006032	chitin catabolic process	1/514	10/6219	0.578238	0.96864	101222731	LOC101222731	1	1	101222731	0
BP	GO:0006040	amino sugar metabolic process	1/514	10/6219	0.578238	0.96864	101222731	LOC101222731	1	1	101222731	0
BP	GO:0006415	translational termination	1/514	10/6219	0.578238	0.96864	101213295	LOC101213295	1	0		1	101213295
BP	GO:0016998	cell wall macromolecule catabolic process	1/514	10/6219	0.578238	0.96864	101222731	LOC101222731	1	1	101222731	0
BP	GO:0044036	cell wall macromolecule metabolic process	1/514	10/6219	0.578238	0.96864	101222731	LOC101222731	1	1	101222731	0
BP	GO:0046348	amino sugar catabolic process	1/514	10/6219	0.578238	0.96864	101222731	LOC101222731	1	1	101222731	0
BP	GO:0048583	regulation of response to stimulus	1/514	10/6219	0.578238	0.96864	101212682	LOC101212682	1	0		1	101212682
BP	GO:0051604	protein maturation	1/514	10/6219	0.578238	0.96864	101220126	LOC101220126	1	1	101220126	0
BP	GO:0090305	nucleic acid phosphodiester bond hydrolysis	1/514	10/6219	0.578238	0.96864	116406046	LOC116406046	1	1	116406046	0
BP	GO:1901071	glucosamine-containing compound metabolic process	1/514	10/6219	0.578238	0.96864	101222731	LOC101222731	1	1	101222731	0
BP	GO:1901072	glucosamine-containing compound catabolic process	1/514	10/6219	0.578238	0.96864	101222731	LOC101222731	1	1	101222731	0
BP	GO:0006812	cation transport	15/514	186/6219	0.580003	0.96864	101208367/101222356/101218801/101208405/101213983/101219619/101221552/101208346/101205555/101208608/101216875/101208339/101219496/101218141/101209937	LOC101208367/LOC101222356/HMA5.2/LOC101208405/LOC101213983/LOC101219619/LOC101221552/LOC101208346/LOC101205555/LOC101208608/LOC101216875/LOC101208339/LOC101219496/LOC101218141/LOC101209937	15	11	101208367/101218801/101208405/101213983/101219619/101208346/101208608/101216875/101208339/101219496/101209937	4	101222356/101221552/101205555/101218141
BP	GO:0006418	tRNA aminoacylation for protein translation	3/514	36/6219	0.581414	0.96864	101210547/101220233/101211723	LOC101210547/LOC101220233/LOC101211723	3	2	101210547/101220233	1	101211723
BP	GO:0009733	response to auxin	3/514	36/6219	0.581414	0.96864	101214812/101217643/105435731	LOC101214812/LOC101217643/LOC105435731	3	1	105435731	2	101214812/101217643
BP	GO:0032501	multicellular organismal process	4/514	49/6219	0.585746	0.96864	105434867/116402699/101215697/101217751	LOC105434867/LOC116402699/LOC101215697/LOC101217751	4	1	105434867	3	116402699/101215697/101217751
BP	GO:0051716	cellular response to stimulus	20/514	249/6219	0.589019	0.96864	101203265/101210765/101215069/101214053/101217761/101219868/101205786/101209542/101208639/101206275/101209777/101217735/101213011/116406348/101204001/101211021/101212682/101204819/105435875/101203531	LOC101203265/LOC101210765/LOC101215069/LOC101214053/LOC101217761/LOC101219868/CS-ERS/LOC101209542/LOC101208639/LOC101206275/LOC101209777/LOC101217735/LOC101213011/LOC116406348/LOC101204001/LOC101211021/LOC101212682/LOC101204819/LOC105435875/LOC101203531	20	4	101210765/101219868/101217735/101203531	16	101203265/101215069/101214053/101217761/101205786/101209542/101208639/101206275/101209777/101213011/116406348/101204001/101211021/101212682/101204819/105435875
BP	GO:0006366	transcription by RNA polymerase II	2/514	24/6219	0.601612	0.96864	101207693/101207528	LOC101207693/LOC101207528	2	1	101207693	1	101207528
BP	GO:0006643	membrane lipid metabolic process	2/514	24/6219	0.601612	0.96864	101204709/101205550	LOC101204709/LOC101205550	2	1	101204709	1	101205550
BP	GO:0008652	cellular amino acid biosynthetic process	4/514	50/6219	0.602064	0.96864	101207177/101203129/101222636/101215982	LOC101207177/LOC101203129/LOC101222636/LOC101215982	4	1	101215982	3	101207177/101203129/101222636
BP	GO:0006308	DNA catabolic process	1/514	11/6219	0.613153	0.96864	116406046	LOC116406046	1	1	116406046	0
BP	GO:0018205	peptidyl-lysine modification	1/514	11/6219	0.613153	0.96864	101220126	LOC101220126	1	1	101220126	0
BP	GO:0042737	drug catabolic process	1/514	11/6219	0.613153	0.96864	101222731	LOC101222731	1	1	101222731	0
BP	GO:0006644	phospholipid metabolic process	4/514	51/6219	0.617988	0.96864	101207441/101207886/101212295/101219958	LOC101207441/LOC101207886/LOC101212295/LOC101219958	4	2	101207441/101207886	2	101212295/101219958
BP	GO:0043038	amino acid activation	3/514	38/6219	0.61882	0.96864	101210547/101220233/101211723	LOC101210547/LOC101220233/LOC101211723	3	2	101210547/101220233	1	101211723
BP	GO:0043039	tRNA aminoacylation	3/514	38/6219	0.61882	0.96864	101210547/101220233/101211723	LOC101210547/LOC101220233/LOC101211723	3	2	101210547/101220233	1	101211723
BP	GO:0055085	transmembrane transport	32/514	402/6219	0.618861	0.96864	101219824/101206752/101219304/101208244/101222296/101215102/101205503/101210264/101207506/101203764/101210018/101217163/101209987/101221620/101217853/101213983/101216286/101207199/101203402/101203724/101208068/101221552/101208346/101205555/101214695/101208396/101221154/101208506/101205586/101218141/101209937/101215746	LOC101219824/LOC101206752/LOC101219304/LOC101208244/LOC101222296/LOC101215102/LOC101205503/LOC101210264/LOC101207506/LOC101203764/LOC101210018/LOC101217163/LOC101209987/LOC101221620/LOC101217853/LOC101213983/LOC101216286/LOC101207199/LOC101203402/LOC101203724/LOC101208068/LOC101221552/LOC101208346/LOC101205555/LOC101214695/LOC101208396/LOC101221154/LOC101208506/LOC101205586/LOC101218141/LOC101209…	32	14	101210018/101217163/101209987/101221620/101217853/101213983/101207199/101203724/101208068/101208346/101214695/101221154/101208506/101209937	18	101219824/101206752/101219304/101208244/101222296/101215102/101205503/101210264/101207506/101203764/101216286/101203402/101221552/101205555/101208396/101205586/101218141/101215746
BP	GO:0009116	nucleoside metabolic process	2/514	25/6219	0.624198	0.96864	101218731/101206917	LOC101218731/LOC101206917	2	1	101206917	1	101218731
BP	GO:1901657	glycosyl compound metabolic process	2/514	25/6219	0.624198	0.96864	101218731/101206917	LOC101218731/LOC101206917	2	1	101206917	1	101218731
BP	GO:0006357	regulation of transcription by RNA polymerase II	1/514	12/6219	0.645182	0.96864	101207693	LOC101207693	1	1	101207693	0
BP	GO:0006414	translational elongation	1/514	12/6219	0.645182	0.96864	101213295	LOC101213295	1	0		1	101213295
BP	GO:0006778	porphyrin-containing compound metabolic process	1/514	12/6219	0.645182	0.96864	101203653	LOC101203653	1	0		1	101203653
BP	GO:0007034	vacuolar transport	1/514	12/6219	0.645182	0.96864	101207637	LOC101207637	1	1	101207637	0
BP	GO:0022411	cellular component disassembly	1/514	12/6219	0.645182	0.96864	101213295	LOC101213295	1	0		1	101213295
BP	GO:0032984	protein-containing complex disassembly	1/514	12/6219	0.645182	0.96864	101213295	LOC101213295	1	0		1	101213295
BP	GO:0043624	cellular protein complex disassembly	1/514	12/6219	0.645182	0.96864	101213295	LOC101213295	1	0		1	101213295
BP	GO:0009719	response to endogenous stimulus	4/514	53/6219	0.648617	0.96864	101210406/101214812/101217643/105435731	LOC101210406/LOC101214812/LOC101217643/LOC105435731	4	1	105435731	3	101210406/101214812/101217643
BP	GO:0009725	response to hormone	4/514	53/6219	0.648617	0.96864	101210406/101214812/101217643/105435731	LOC101210406/LOC101214812/LOC101217643/LOC105435731	4	1	105435731	3	101210406/101214812/101217643
BP	GO:0010033	response to organic substance	4/514	53/6219	0.648617	0.96864	101210406/101214812/101217643/105435731	LOC101210406/LOC101214812/LOC101217643/LOC105435731	4	1	105435731	3	101210406/101214812/101217643
BP	GO:1901607	alpha-amino acid biosynthetic process	3/514	41/6219	0.670542	0.980265	101203129/101222636/101215982	LOC101203129/LOC101222636/LOC101215982	3	1	101215982	2	101203129/101222636
BP	GO:0003333	amino acid transmembrane transport	1/514	13/6219	0.674565	0.980265	101217853	LOC101217853	1	1	101217853	0
BP	GO:0006865	amino acid transport	1/514	13/6219	0.674565	0.980265	101217853	LOC101217853	1	1	101217853	0
BP	GO:0009073	aromatic amino acid family biosynthetic process	1/514	13/6219	0.674565	0.980265	101207177	LOC101207177	1	0		1	101207177
BP	GO:0009084	glutamine family amino acid biosynthetic process	1/514	13/6219	0.674565	0.980265	101215982	LOC101215982	1	1	101215982	0
BP	GO:0042440	pigment metabolic process	1/514	13/6219	0.674565	0.980265	101203653	LOC101203653	1	0		1	101203653
BP	GO:0009119	ribonucleoside metabolic process	1/514	14/6219	0.701518	0.980265	101206917	LOC101206917	1	1	101206917	0
BP	GO:0010629	negative regulation of gene expression	1/514	14/6219	0.701518	0.980265	101210625	LOC101210625	1	1	101210625	0
BP	GO:0042254	ribosome biogenesis	3/514	44/6219	0.716935	0.980265	101222102/101222795/116406426	LOC101222102/LOC101222795/LOC116406426	3	1	101222102	2	101222795/116406426
BP	GO:0043933	protein-containing complex subunit organization	4/514	58/6219	0.717823	0.980265	101220621/101213295/101205007/101205659	LOC101220621/LOC101213295/LOC101205007/LOC101205659	4	3	101220621/101205007/101205659	1	101213295
BP	GO:0006996	organelle organization	6/514	86/6219	0.725918	0.980265	101205383/101215950/101214589/101205007/101205659/101216440	LOC101205383/LOC101215950/LOC101214589/LOC101205007/LOC101205659/LOC101216440	6	4	101214589/101205007/101205659/101216440	2	101205383/101215950
BP	GO:0045454	cell redox homeostasis	6/514	86/6219	0.725918	0.980265	101205594/101203007/101221729/101219391/101211038/101220333	LOC101205594/LOC101203007/LOC101221729/LOC101219391/LOC101211038/LOC101220333	6	4	101205594/101203007/101221729/101219391	2	101211038/101220333
BP	GO:0006066	alcohol metabolic process	1/514	15/6219	0.726243	0.980265	101207441	LOC101207441	1	1	101207441	0
BP	GO:0009892	negative regulation of metabolic process	1/514	15/6219	0.726243	0.980265	101210625	LOC101210625	1	1	101210625	0
BP	GO:0010605	negative regulation of macromolecule metabolic process	1/514	15/6219	0.726243	0.980265	101210625	LOC101210625	1	1	101210625	0
BP	GO:0019751	polyol metabolic process	1/514	15/6219	0.726243	0.980265	101207441	LOC101207441	1	1	101207441	0
BP	GO:0051130	positive regulation of cellular component organization	1/514	15/6219	0.726243	0.980265	101213295	LOC101213295	1	0		1	101213295
BP	GO:0071804	cellular potassium ion transport	1/514	15/6219	0.726243	0.980265	101218141	LOC101218141	1	0		1	101218141
BP	GO:0071805	potassium ion transmembrane transport	1/514	15/6219	0.726243	0.980265	101218141	LOC101218141	1	0		1	101218141
BP	GO:0019725	cellular homeostasis	6/514	87/6219	0.736214	0.980265	101205594/101203007/101221729/101219391/101211038/101220333	LOC101205594/LOC101203007/LOC101221729/LOC101219391/LOC101211038/LOC101220333	6	4	101205594/101203007/101221729/101219391	2	101211038/101220333
BP	GO:0008610	lipid biosynthetic process	7/514	101/6219	0.740624	0.980265	101217359/101207441/101203441/101207886/101212295/101210955/101218433	LOC101217359/LOC101207441/LOC101203441/LOC101207886/LOC101212295/LOC101210955/LOC101218433	7	2	101207441/101207886	5	101217359/101203441/101212295/101210955/101218433
BP	GO:0016043	cellular component organization	13/514	181/6219	0.743376	0.980265	101205557/101205383/101220621/101220821/101215950/101213295/101214589/101205007/101205659/101216440/101217414/101217635/101212388	LOC101205557/LOC101205383/LOC101220621/LOC101220821/LOC101215950/LOC101213295/LOC101214589/LOC101205007/LOC101205659/LOC101216440/LOC101217414/LOC101217635/LOC101212388	13	7	101220621/101220821/101214589/101205007/101205659/101216440/101212388	6	101205557/101205383/101215950/101213295/101217414/101217635
BP	GO:0022613	ribonucleoprotein complex biogenesis	3/514	46/6219	0.744949	0.980265	101222102/101222795/116406426	LOC101222102/LOC101222795/LOC116406426	3	1	101222102	2	101222795/116406426
BP	GO:0006520	cellular amino acid metabolic process	8/514	115/6219	0.745432	0.980265	101207177/116406341/101203129/101210547/101222636/101215982/101220233/101211723	LOC101207177/LOC116406341/LOC101203129/LOC101210547/LOC101222636/LOC101215982/LOC101220233/LOC101211723	8	4	116406341/101210547/101215982/101220233	4	101207177/101203129/101222636/101211723
BP	GO:0006470	protein dephosphorylation	1/514	16/6219	0.748924	0.980265	101220751	LOC101220751	1	1	101220751	0
BP	GO:0016311	dephosphorylation	1/514	16/6219	0.748924	0.980265	101220751	LOC101220751	1	1	101220751	0
BP	GO:0098656	anion transmembrane transport	1/514	16/6219	0.748924	0.980265	101217853	LOC101217853	1	1	101217853	0
BP	GO:1903825	organic acid transmembrane transport	1/514	16/6219	0.748924	0.980265	101217853	LOC101217853	1	1	101217853	0
BP	GO:1905039	carboxylic acid transmembrane transport	1/514	16/6219	0.748924	0.980265	101217853	LOC101217853	1	1	101217853	0
BP	GO:0006790	sulfur compound metabolic process	2/514	32/6219	0.755135	0.980265	101203129/101222636	LOC101203129/LOC101222636	2	0		2	101203129/101222636
BP	GO:0042592	homeostatic process	6/514	89/6219	0.755973	0.980265	101205594/101203007/101221729/101219391/101211038/101220333	LOC101205594/LOC101203007/LOC101221729/LOC101219391/LOC101211038/LOC101220333	6	4	101205594/101203007/101221729/101219391	2	101211038/101220333
BP	GO:0006813	potassium ion transport	1/514	17/6219	0.769729	0.980265	101218141	LOC101218141	1	0		1	101218141
BP	GO:0009064	glutamine family amino acid metabolic process	1/514	17/6219	0.769729	0.980265	101215982	LOC101215982	1	1	101215982	0
BP	GO:0016567	protein ubiquitination	3/514	48/6219	0.77071	0.980265	101203877/101215873/101217665	LOC101203877/LOC101215873/LOC101217665	3	2	101215873/101217665	1	101203877
BP	GO:0065003	protein-containing complex assembly	3/514	48/6219	0.77071	0.980265	101220621/101205007/101205659	LOC101220621/LOC101205007/LOC101205659	3	3	101220621/101205007/101205659	0
BP	GO:0071840	cellular component organization or biogenesis	16/514	226/6219	0.779359	0.980265	101205557/101205383/101220621/101220821/101215950/101213295/101222102/101214589/101205007/101205659/101216440/101217414/101217635/101212388/101222795/116406426	LOC101205557/LOC101205383/LOC101220621/LOC101220821/LOC101215950/LOC101213295/LOC101222102/LOC101214589/LOC101205007/LOC101205659/LOC101216440/LOC101217414/LOC101217635/LOC101212388/LOC101222795/LOC116406426	16	8	101220621/101220821/101222102/101214589/101205007/101205659/101216440/101212388	8	101205557/101205383/101215950/101213295/101217414/101217635/101222795/116406426
BP	GO:0032446	protein modification by small protein conjugation	3/514	49/6219	0.782773	0.980265	101203877/101215873/101217665	LOC101203877/LOC101215873/LOC101217665	3	2	101215873/101217665	1	101203877
BP	GO:0034660	ncRNA metabolic process	6/514	92/6219	0.783552	0.980265	101210547/101206917/101220274/101219631/101220233/101211723	LOC101210547/LOC101206917/LOC101220274/LOC101219631/LOC101220233/LOC101211723	6	5	101210547/101206917/101220274/101219631/101220233	1	101211723
BP	GO:0009072	aromatic amino acid family metabolic process	1/514	19/6219	0.806318	0.980265	101207177	LOC101207177	1	0		1	101207177
BP	GO:0015985	energy coupled proton transport, down electrochemical gradient	1/514	19/6219	0.806318	0.980265	101205555	LOC101205555	1	0		1	101205555
BP	GO:0015986	ATP synthesis coupled proton transport	1/514	19/6219	0.806318	0.980265	101205555	LOC101205555	1	0		1	101205555
BP	GO:0006511	ubiquitin-dependent protein catabolic process	2/514	36/6219	0.810744	0.980265	105434867/101209121	LOC105434867/LOC101209121	2	2	105434867/101209121	0
BP	GO:0019941	modification-dependent protein catabolic process	2/514	36/6219	0.810744	0.980265	105434867/101209121	LOC105434867/LOC101209121	2	2	105434867/101209121	0
BP	GO:0043632	modification-dependent macromolecule catabolic process	2/514	36/6219	0.810744	0.980265	105434867/101209121	LOC105434867/LOC101209121	2	2	105434867/101209121	0
BP	GO:0006720	isoprenoid metabolic process	1/514	20/6219	0.822375	0.980265	101212295	LOC101212295	1	0		1	101212295
BP	GO:0007275	multicellular organism development	1/514	20/6219	0.822375	0.980265	105434867	LOC105434867	1	1	105434867	0
BP	GO:0008299	isoprenoid biosynthetic process	1/514	20/6219	0.822375	0.980265	101212295	LOC101212295	1	0		1	101212295
BP	GO:0032502	developmental process	1/514	20/6219	0.822375	0.980265	105434867	LOC105434867	1	1	105434867	0
BP	GO:0033013	tetrapyrrole metabolic process	1/514	20/6219	0.822375	0.980265	101203653	LOC101203653	1	0		1	101203653
BP	GO:0048856	anatomical structure development	1/514	20/6219	0.822375	0.980265	105434867	LOC105434867	1	1	105434867	0
BP	GO:1901615	organic hydroxy compound metabolic process	1/514	20/6219	0.822375	0.980265	101207441	LOC101207441	1	1	101207441	0
BP	GO:0018193	peptidyl-amino acid modification	2/514	37/6219	0.822764	0.980265	101220126/101206458	LOC101220126/LOC101206458	2	1	101220126	1	101206458
BP	GO:1901605	alpha-amino acid metabolic process	3/514	53/6219	0.825881	0.980265	101203129/101222636/101215982	LOC101203129/LOC101222636/LOC101215982	3	1	101215982	2	101203129/101222636
BP	GO:0051128	regulation of cellular component organization	1/514	21/6219	0.837103	0.980265	101213295	LOC101213295	1	0		1	101213295
BP	GO:0006259	DNA metabolic process	9/514	142/6219	0.841339	0.980265	101215950/101210889/101217274/116406046/101211850/101208568/101211021/101211201/101204819	LOC101215950/LOC101210889/LOC101217274/LOC116406046/LOC101211850/LOC101208568/LOC101211021/LOC101211201/LOC101204819	9	2	116406046/101211201	7	101215950/101210889/101217274/101211850/101208568/101211021/101204819
BP	GO:1901565	organonitrogen compound catabolic process	4/514	70/6219	0.841871	0.980265	105434867/101222731/101203653/101209121	LOC105434867/LOC101222731/LOC101203653/LOC101209121	4	3	105434867/101222731/101209121	1	101203653
BP	GO:0034470	ncRNA processing	3/514	55/6219	0.844552	0.980265	101206917/101220274/101219631	LOC101206917/LOC101220274/LOC101219631	3	3	101206917/101220274/101219631	0
BP	GO:0070647	protein modification by small protein conjugation or removal	4/514	71/6219	0.849765	0.980265	101203877/101215873/101217665/101204698	LOC101203877/LOC101215873/LOC101217665/LOC101204698	4	2	101215873/101217665	2	101203877/101204698
BP	GO:0016579	protein deubiquitination	1/514	22/6219	0.850612	0.980265	101204698	LOC101204698	1	0		1	101204698
BP	GO:0070646	protein modification by small protein removal	1/514	22/6219	0.850612	0.980265	101204698	LOC101204698	1	0		1	101204698
BP	GO:0071702	organic substance transport	9/514	145/6219	0.858134	0.980265	101219096/101223175/101211429/101218761/101222163/101213217/101212337/101217853/101206370	LOC101219096/LOC101223175/LOC101211429/LOC101218761/LOC101222163/LOC101213217/LOC101212337/LOC101217853/LOC101206370	9	5	101219096/101223175/101211429/101218761/101217853	4	101222163/101213217/101212337/101206370
BP	GO:0009100	glycoprotein metabolic process	2/514	41/6219	0.864262	0.980265	101222690/101212638	LOC101222690/LOC101212638	2	1	101212638	1	101222690
BP	GO:0009101	glycoprotein biosynthetic process	2/514	41/6219	0.864262	0.980265	101222690/101212638	LOC101222690/LOC101212638	2	1	101212638	1	101222690
BP	GO:0044265	cellular macromolecule catabolic process	3/514	58/6219	0.869298	0.980265	105434867/116406046/101209121	LOC105434867/LOC116406046/LOC101209121	3	3	105434867/116406046/101209121	0
BP	GO:0022607	cellular component assembly	4/514	74/6219	0.871472	0.980265	101220621/101214589/101205007/101205659	LOC101220621/LOC101214589/LOC101205007/LOC101205659	4	4	101220621/101214589/101205007/101205659	0
BP	GO:0044085	cellular component biogenesis	7/514	119/6219	0.872496	0.980265	101220621/101222102/101214589/101205007/101205659/101222795/116406426	LOC101220621/LOC101222102/LOC101214589/LOC101205007/LOC101205659/LOC101222795/LOC116406426	7	5	101220621/101222102/101214589/101205007/101205659	2	101222795/116406426
BP	GO:0034622	cellular protein-containing complex assembly	2/514	43/6219	0.881491	0.980265	101205007/101205659	LOC101205007/LOC101205659	2	2	101205007/101205659	0
BP	GO:0046907	intracellular transport	5/514	91/6219	0.882025	0.980265	101219096/101222163/101213217/101212337/101203696	LOC101219096/LOC101222163/LOC101213217/LOC101212337/LOC101203696	5	1	101219096	4	101222163/101213217/101212337/101203696
BP	GO:0051649	establishment of localization in cell	5/514	91/6219	0.882025	0.980265	101219096/101222163/101213217/101212337/101203696	LOC101219096/LOC101222163/LOC101213217/LOC101212337/LOC101203696	5	1	101219096	4	101222163/101213217/101212337/101203696
BP	GO:0000413	protein peptidyl-prolyl isomerization	1/514	25/6219	0.884791	0.980265	101206458	LOC101206458	1	0		1	101206458
BP	GO:0018208	peptidyl-proline modification	1/514	25/6219	0.884791	0.980265	101206458	LOC101206458	1	0		1	101206458
BP	GO:0044257	cellular protein catabolic process	2/514	44/6219	0.889327	0.980265	105434867/101209121	LOC105434867/LOC101209121	2	2	105434867/101209121	0
BP	GO:0051603	proteolysis involved in cellular protein catabolic process	2/514	44/6219	0.889327	0.980265	105434867/101209121	LOC105434867/LOC101209121	2	2	105434867/101209121	0
BP	GO:0016192	vesicle-mediated transport	7/514	123/6219	0.892712	0.980265	101222163/101213217/101212337/101221387/101203696/101220775/101210035	LOC101222163/LOC101213217/LOC101212337/LOC101221387/LOC101203696/LOC101220775/LOC101210035	7	1	101221387	6	101222163/101213217/101212337/101203696/101220775/101210035
BP	GO:0006886	intracellular protein transport	4/514	79/6219	0.901661	0.980265	101219096/101222163/101213217/101212337	LOC101219096/LOC101222163/LOC101213217/LOC101212337	4	1	101219096	3	101222163/101213217/101212337
BP	GO:0006396	RNA processing	7/514	125/6219	0.901765	0.980265	101206291/101205919/101217340/101206917/101220274/101215920/101219631	LOC101206291/LOC101205919/LOC101217340/LOC101206917/LOC101220274/LOC101215920/LOC101219631	7	5	101206291/101217340/101206917/101220274/101219631	2	101205919/101215920
BP	GO:0006508	proteolysis	14/514	227/6219	0.906315	0.980265	101215771/101215538/116402232/105434867/101210271/101220830/101209256/101206928/101222921/101214825/101217410/101204698/101209121/101211004	LOC101215771/LOC101215538/LOC116402232/LOC105434867/LOC101210271/LOC101220830/LOC101209256/LOC101206928/LOC101222921/LOC101214825/LOC101217410/LOC101204698/LOC101209121/LOC101211004	14	9	101215771/101215538/105434867/101210271/101220830/101209256/101206928/101222921/101209121	5	116402232/101214825/101217410/101204698/101211004
BP	GO:0007264	small GTPase mediated signal transduction	3/514	65/6219	0.913977	0.980265	101208639/101217735/101212682	LOC101208639/LOC101217735/LOC101212682	3	1	101217735	2	101208639/101212682
BP	GO:0030163	protein catabolic process	2/514	48/6219	0.916101	0.980265	105434867/101209121	LOC105434867/LOC101209121	2	2	105434867/101209121	0
BP	GO:0065008	regulation of biological quality	6/514	117/6219	0.929884	0.980265	101205594/101203007/101221729/101219391/101211038/101220333	LOC101205594/LOC101203007/LOC101221729/LOC101219391/LOC101211038/LOC101220333	6	4	101205594/101203007/101221729/101219391	2	101211038/101220333
BP	GO:0071705	nitrogen compound transport	7/514	136/6219	0.940741	0.980265	101222356/101219096/101222163/101213217/101212337/101217853/101206370	LOC101222356/LOC101219096/LOC101222163/LOC101213217/LOC101212337/LOC101217853/LOC101206370	7	2	101219096/101217853	5	101222356/101222163/101213217/101212337/101206370
BP	GO:0043043	peptide biosynthetic process	17/514	284/6219	0.94342	0.980265	101203845/101219899/101219651/101213295/101205258/3429308/101210547/101210000/101207012/101214334/101204269/101208580/101220973/101215592/101206444/101220233/101211723	LOC101203845/LOC101219899/LOC101219651/LOC101213295/LOC101205258/rps14/LOC101210547/LOC101210000/LOC101207012/LOC101214334/LOC101204269/LOC101208580/LOC101220973/LOC101215592/LOC101206444/LOC101220233/LOC101211723	17	6	101219651/3429308/101210547/101214334/101215592/101220233	11	101203845/101219899/101213295/101205258/101210000/101207012/101204269/101208580/101220973/101206444/101211723
BP	GO:0046488	phosphatidylinositol metabolic process	1/514	34/6219	0.947198	0.980265	101219958	LOC101219958	1	0		1	101219958
BP	GO:0034613	cellular protein localization	4/514	91/6219	0.950027	0.980265	101219096/101222163/101213217/101212337	LOC101219096/LOC101222163/LOC101213217/LOC101212337	4	1	101219096	3	101222163/101213217/101212337
BP	GO:0070727	cellular macromolecule localization	4/514	91/6219	0.950027	0.980265	101219096/101222163/101213217/101212337	LOC101219096/LOC101222163/LOC101213217/LOC101212337	4	1	101219096	3	101222163/101213217/101212337
BP	GO:0006397	mRNA processing	1/514	35/6219	0.951586	0.980265	101206291	LOC101206291	1	1	101206291	0
BP	GO:0034220	ion transmembrane transport	3/514	75/6219	0.954001	0.980265	101217853/101205555/101218141	LOC101217853/LOC101205555/LOC101218141	3	1	101217853	2	101205555/101218141
BP	GO:0006518	peptide metabolic process	17/514	290/6219	0.954163	0.980265	101203845/101219899/101219651/101213295/101205258/3429308/101210547/101210000/101207012/101214334/101204269/101208580/101220973/101215592/101206444/101220233/101211723	LOC101203845/LOC101219899/LOC101219651/LOC101213295/LOC101205258/rps14/LOC101210547/LOC101210000/LOC101207012/LOC101214334/LOC101204269/LOC101208580/LOC101220973/LOC101215592/LOC101206444/LOC101220233/LOC101211723	17	6	101219651/3429308/101210547/101214334/101215592/101220233	11	101203845/101219899/101213295/101205258/101210000/101207012/101204269/101208580/101220973/101206444/101211723
BP	GO:0043603	cellular amide metabolic process	18/514	305/6219	0.955305	0.980265	101203845/101219899/101219651/101213295/101205258/3429308/101210547/101210000/101207012/101214334/101204269/101208580/101220973/101215592/101206444/101220233/101205550/101211723	LOC101203845/LOC101219899/LOC101219651/LOC101213295/LOC101205258/rps14/LOC101210547/LOC101210000/LOC101207012/LOC101214334/LOC101204269/LOC101208580/LOC101220973/LOC101215592/LOC101206444/LOC101220233/LOC101205550/LOC101211723	18	6	101219651/3429308/101210547/101214334/101215592/101220233	12	101203845/101219899/101213295/101205258/101210000/101207012/101204269/101208580/101220973/101206444/101205550/101211723
BP	GO:0006650	glycerophospholipid metabolic process	1/514	36/6219	0.95561	0.980265	101219958	LOC101219958	1	0		1	101219958
BP	GO:0015672	monovalent inorganic cation transport	2/514	57/6219	0.955758	0.980265	101205555/101218141	LOC101205555/LOC101218141	2	0		2	101205555/101218141
BP	GO:0098655	cation transmembrane transport	2/514	58/6219	0.958846	0.980265	101205555/101218141	LOC101205555/LOC101218141	2	0		2	101205555/101218141
BP	GO:0098660	inorganic ion transmembrane transport	2/514	58/6219	0.958846	0.980265	101205555/101218141	LOC101205555/LOC101218141	2	0		2	101205555/101218141
BP	GO:0098662	inorganic cation transmembrane transport	2/514	58/6219	0.958846	0.980265	101205555/101218141	LOC101205555/LOC101218141	2	0		2	101205555/101218141
BP	GO:1902600	proton transmembrane transport	1/514	37/6219	0.9593	0.980265	101205555	LOC101205555	1	0		1	101205555
BP	GO:0043604	amide biosynthetic process	17/514	294/6219	0.960303	0.980265	101203845/101219899/101219651/101213295/101205258/3429308/101210547/101210000/101207012/101214334/101204269/101208580/101220973/101215592/101206444/101220233/101211723	LOC101203845/LOC101219899/LOC101219651/LOC101213295/LOC101205258/rps14/LOC101210547/LOC101210000/LOC101207012/LOC101214334/LOC101204269/LOC101208580/LOC101220973/LOC101215592/LOC101206444/LOC101220233/LOC101211723	17	6	101219651/3429308/101210547/101214334/101215592/101220233	11	101203845/101219899/101213295/101205258/101210000/101207012/101204269/101208580/101220973/101206444/101211723
BP	GO:0015031	protein transport	5/514	112/6219	0.960686	0.980265	101219096/101222163/101213217/101212337/101206370	LOC101219096/LOC101222163/LOC101213217/LOC101212337/LOC101206370	5	1	101219096	4	101222163/101213217/101212337/101206370
BP	GO:0015833	peptide transport	5/514	112/6219	0.960686	0.980265	101219096/101222163/101213217/101212337/101206370	LOC101219096/LOC101222163/LOC101213217/LOC101212337/LOC101206370	5	1	101219096	4	101222163/101213217/101212337/101206370
BP	GO:0042886	amide transport	5/514	112/6219	0.960686	0.980265	101219096/101222163/101213217/101212337/101206370	LOC101219096/LOC101222163/LOC101213217/LOC101212337/LOC101206370	5	1	101219096	4	101222163/101213217/101212337/101206370
BP	GO:0006412	translation	16/514	281/6219	0.962375	0.980265	101203845/101219899/101219651/101213295/3429308/101210547/101210000/101207012/101214334/101204269/101208580/101220973/101215592/101206444/101220233/101211723	LOC101203845/LOC101219899/LOC101219651/LOC101213295/rps14/LOC101210547/LOC101210000/LOC101207012/LOC101214334/LOC101204269/LOC101208580/LOC101220973/LOC101215592/LOC101206444/LOC101220233/LOC101211723	16	6	101219651/3429308/101210547/101214334/101215592/101220233	10	101203845/101219899/101213295/101210000/101207012/101204269/101208580/101220973/101206444/101211723
BP	GO:0006486	protein glycosylation	1/514	38/6219	0.962684	0.980265	101222690	LOC101222690	1	0		1	101222690
BP	GO:0043413	macromolecule glycosylation	1/514	38/6219	0.962684	0.980265	101222690	LOC101222690	1	0		1	101222690
BP	GO:0046486	glycerolipid metabolic process	1/514	38/6219	0.962684	0.980265	101219958	LOC101219958	1	0		1	101219958
BP	GO:0033036	macromolecule localization	6/514	131/6219	0.965673	0.980265	101219096/101223175/101222163/101213217/101212337/101206370	LOC101219096/LOC101223175/LOC101222163/LOC101213217/LOC101212337/LOC101206370	6	2	101219096/101223175	4	101222163/101213217/101212337/101206370
BP	GO:0016071	mRNA metabolic process	1/514	39/6219	0.965787	0.980265	101206291	LOC101206291	1	1	101206291	0
BP	GO:0051641	cellular localization	5/514	115/6219	0.966739	0.980265	101219096/101222163/101213217/101212337/101203696	LOC101219096/LOC101222163/LOC101213217/LOC101212337/LOC101203696	5	1	101219096	4	101222163/101213217/101212337/101203696
BP	GO:0045184	establishment of protein localization	5/514	117/6219	0.970284	0.980265	101219096/101222163/101213217/101212337/101206370	LOC101219096/LOC101222163/LOC101213217/LOC101212337/LOC101206370	5	1	101219096	4	101222163/101213217/101212337/101206370
BP	GO:0070085	glycosylation	1/514	43/6219	0.975829	0.980265	101222690	LOC101222690	1	0		1	101222690
BP	GO:0006281	DNA repair	2/514	66/6219	0.977105	0.980265	101211021/101204819	LOC101211021/LOC101204819	2	0		2	101211021/101204819
BP	GO:0008104	protein localization	5/514	124/6219	0.980119	0.980265	101219096/101222163/101213217/101212337/101206370	LOC101219096/LOC101222163/LOC101213217/LOC101212337/LOC101206370	5	1	101219096	4	101222163/101213217/101212337/101206370
BP	GO:0006974	cellular response to DNA damage stimulus	2/514	68/6219	0.980265	0.980265	101211021/101204819	LOC101211021/LOC101204819	2	0		2	101211021/101204819
BP	GO:0033554	cellular response to stress	2/514	68/6219	0.980265	0.980265	101211021/101204819	LOC101211021/LOC101204819	2	0		2	101211021/101204819
CC	GO:0005576	extracellular region	7/182	37/2244	0.0262199	0.592355	101217842/101221682/101208641/101207511/101222921/101209366/101217992	XTH3/LOC101221682/LOC101208641/LOC101207511/LOC101222921/LOC101209366/LOC101217992	7	3	101217842/101208641/101222921	4	101221682/101207511/101209366/101217992
CC	GO:0005618	cell wall	10/182	64/2244	0.0306391	0.592355	101205557/101220821/101217842/101221682/101208641/101209366/101217414/101217635/101212388/101217992	LOC101205557/LOC101220821/XTH3/LOC101221682/LOC101208641/LOC101209366/LOC101217414/LOC101217635/LOC101212388/LOC101217992	10	4	101220821/101217842/101208641/101212388	6	101205557/101221682/101209366/101217414/101217635/101217992
CC	GO:0030312	external encapsulating structure	10/182	64/2244	0.0306391	0.592355	101205557/101220821/101217842/101221682/101208641/101209366/101217414/101217635/101212388/101217992	LOC101205557/LOC101220821/XTH3/LOC101221682/LOC101208641/LOC101209366/LOC101217414/LOC101217635/LOC101212388/LOC101217992	10	4	101220821/101217842/101208641/101212388	6	101205557/101221682/101209366/101217414/101217635/101217992
CC	GO:0048046	apoplast	5/182	27/2244	0.0619721	0.898595	101217842/101221682/101208641/101209366/101217992	XTH3/LOC101221682/LOC101208641/LOC101209366/LOC101217992	5	2	101217842/101208641	3	101221682/101209366/101217992
CC	GO:0005794	Golgi apparatus	3/182	24/2244	0.307855	0.99978	101213217/101212337/101210035	LOC101213217/LOC101212337/LOC101210035	3	0		3	101213217/101212337/101210035
CC	GO:0044431	Golgi apparatus part	3/182	24/2244	0.307855	0.99978	101213217/101212337/101210035	LOC101213217/LOC101212337/LOC101210035	3	0		3	101213217/101212337/101210035
CC	GO:0005634	nucleus	33/182	376/2244	0.333322	0.99978	101206453/101211247/101206291/101210406/101205383/105434867/101202772/101219589/101217292/101213234/101205529/101214196/101207693/101213265/101207528/105434392/101205007/101205659/101223028/101218948/101215012/101222261/101209688/101207071/101223199/101222795/101212222/101223208/101220518/101209970/101208568/101215306/101217210	LOC101206453/LOC101211247/LOC101206291/LOC101210406/LOC101205383/LOC105434867/LOC101202772/LOC101219589/LOC101217292/LOC101213234/LOC101205529/LOC101214196/LOC101207693/LOC101213265/LOC101207528/LOC105434392/LOC101205007/LOC101205659/LOC101223028/LOC101218948/LOC101215012/LOC101222261/LOC101209688/LOC101207071/LOC101223199/LOC101222795/LOC101212222/LOC101223208/LOC101220518/LOC101209970/LOC101208…	33	19	101206453/101206291/105434867/101202772/101219589/101217292/101213234/101205529/101214196/101207693/101213265/101205007/101205659/101215012/101222261/101207071/101223208/101220518/101209970	14	101211247/101210406/101205383/101207528/105434392/101223028/101218948/101209688/101223199/101222795/101212222/101208568/101215306/101217210
CC	GO:0071944	cell periphery	10/182	111/2244	0.412579	0.99978	101205557/101220821/101217842/101221682/101208641/101209366/101217414/101217635/101212388/101217992	LOC101205557/LOC101220821/XTH3/LOC101221682/LOC101208641/LOC101209366/LOC101217414/LOC101217635/LOC101212388/LOC101217992	10	4	101220821/101217842/101208641/101212388	6	101205557/101221682/101209366/101217414/101217635/101217992
CC	GO:0005798	Golgi-associated vesicle	2/182	18/2244	0.435769	0.99978	101213217/101212337	LOC101213217/LOC101212337	2	0		2	101213217/101212337
CC	GO:0012506	vesicle membrane	2/182	18/2244	0.435769	0.99978	101213217/101212337	LOC101213217/LOC101212337	2	0		2	101213217/101212337
CC	GO:0030120	vesicle coat	2/182	18/2244	0.435769	0.99978	101213217/101212337	LOC101213217/LOC101212337	2	0		2	101213217/101212337
CC	GO:0030135	coated vesicle	2/182	18/2244	0.435769	0.99978	101213217/101212337	LOC101213217/LOC101212337	2	0		2	101213217/101212337
CC	GO:0030659	cytoplasmic vesicle membrane	2/182	18/2244	0.435769	0.99978	101213217/101212337	LOC101213217/LOC101212337	2	0		2	101213217/101212337
CC	GO:0030660	Golgi-associated vesicle membrane	2/182	18/2244	0.435769	0.99978	101213217/101212337	LOC101213217/LOC101212337	2	0		2	101213217/101212337
CC	GO:0030662	coated vesicle membrane	2/182	18/2244	0.435769	0.99978	101213217/101212337	LOC101213217/LOC101212337	2	0		2	101213217/101212337
CC	GO:0031410	cytoplasmic vesicle	2/182	18/2244	0.435769	0.99978	101213217/101212337	LOC101213217/LOC101212337	2	0		2	101213217/101212337
CC	GO:0031982	vesicle	2/182	18/2244	0.435769	0.99978	101213217/101212337	LOC101213217/LOC101212337	2	0		2	101213217/101212337
CC	GO:0044433	cytoplasmic vesicle part	2/182	18/2244	0.435769	0.99978	101213217/101212337	LOC101213217/LOC101212337	2	0		2	101213217/101212337
CC	GO:0097708	intracellular vesicle	2/182	18/2244	0.435769	0.99978	101213217/101212337	LOC101213217/LOC101212337	2	0		2	101213217/101212337
CC	GO:0044427	chromosomal part	2/182	23/2244	0.568143	0.99978	101205007/101205659	LOC101205007/LOC101205659	2	2	101205007/101205659	0
CC	GO:0005777	peroxisome	1/182	10/2244	0.571563	0.99978	101216440	LOC101216440	1	1	101216440	0
CC	GO:0042579	microbody	1/182	10/2244	0.571563	0.99978	101216440	LOC101216440	1	1	101216440	0
CC	GO:0098800	inner mitochondrial membrane protein complex	1/182	11/2244	0.606467	0.99978	101205555	LOC101205555	1	0		1	101205555
CC	GO:0044455	mitochondrial membrane part	1/182	13/2244	0.668015	0.99978	101205555	LOC101205555	1	0		1	101205555
CC	GO:0005694	chromosome	3/182	43/2244	0.691142	0.99978	101205007/101205659/116406046	LOC101205007/LOC101205659/LOC116406046	3	3	101205007/101205659/116406046	0
CC	GO:0033177	proton-transporting two-sector ATPase complex, proton-transporting domain	1/182	14/2244	0.695098	0.99978	101205555	LOC101205555	1	0		1	101205555
CC	GO:0045259	proton-transporting ATP synthase complex	1/182	14/2244	0.695098	0.99978	101205555	LOC101205555	1	0		1	101205555
CC	GO:0098798	mitochondrial protein complex	1/182	14/2244	0.695098	0.99978	101205555	LOC101205555	1	0		1	101205555
CC	GO:0030117	membrane coat	2/182	29/2244	0.695634	0.99978	101213217/101212337	LOC101213217/LOC101212337	2	0		2	101213217/101212337
CC	GO:0048475	coated membrane	2/182	29/2244	0.695634	0.99978	101213217/101212337	LOC101213217/LOC101212337	2	0		2	101213217/101212337
CC	GO:0005743	mitochondrial inner membrane	1/182	15/2244	0.719982	0.99978	101205555	LOC101205555	1	0		1	101205555
CC	GO:0019866	organelle inner membrane	1/182	16/2244	0.742846	0.99978	101205555	LOC101205555	1	0		1	101205555
CC	GO:0061695	transferase complex, transferring phosphorus-containing groups	1/182	16/2244	0.742846	0.99978	101221089	LOC101221089	1	1	101221089	0
CC	GO:0098805	whole membrane	2/182	32/2244	0.746846	0.99978	101213217/101212337	LOC101213217/LOC101212337	2	0		2	101213217/101212337
CC	GO:0044429	mitochondrial part	2/182	34/2244	0.776753	0.99978	101205555/101212048	LOC101205555/LOC101212048	2	0		2	101205555/101212048
CC	GO:0098588	bounding membrane of organelle	2/182	39/2244	0.838402	0.99978	101213217/101212337	LOC101213217/LOC101212337	2	0		2	101213217/101212337
CC	GO:0005739	mitochondrion	5/182	86/2244	0.841396	0.99978	116403946/101205555/101206293/116403949/101212048	LOC116403946/LOC101205555/LOC101206293/LOC116403949/LOC101212048	5	0		5	116403946/101205555/101206293/116403949/101212048
CC	GO:0031090	organelle membrane	3/182	56/2244	0.846122	0.99978	101213217/101212337/101205555	LOC101213217/LOC101212337/LOC101205555	3	0		3	101213217/101212337/101205555
CC	GO:0031966	mitochondrial membrane	1/182	25/2244	0.880744	0.99978	101205555	LOC101205555	1	0		1	101205555
CC	GO:0099023	tethering complex	1/182	27/2244	0.899508	0.99978	101210035	LOC101210035	1	0		1	101210035
CC	GO:0005740	mitochondrial envelope	1/182	28/2244	0.907758	0.99978	101205555	LOC101205555	1	0		1	101205555
CC	GO:0016469	proton-transporting two-sector ATPase complex	1/182	30/2244	0.92229	0.99978	101205555	LOC101205555	1	0		1	101205555
CC	GO:0031967	organelle envelope	1/182	36/2244	0.953582	0.99978	101205555	LOC101205555	1	0		1	101205555
CC	GO:0031975	envelope	1/182	36/2244	0.953582	0.99978	101205555	LOC101205555	1	0		1	101205555
CC	GO:0012505	endomembrane system	3/182	78/2244	0.95983	0.99978	101213217/101212337/101210035	LOC101213217/LOC101212337/LOC101210035	3	0		3	101213217/101212337/101210035
CC	GO:1990234	transferase complex	1/182	41/2244	0.96982	0.99978	101221089	LOC101221089	1	1	101221089	0
CC	GO:0031974	membrane-enclosed lumen	1/182	53/2244	0.989306	0.99978	101212048	LOC101212048	1	0		1	101212048
CC	GO:0043233	organelle lumen	1/182	53/2244	0.989306	0.99978	101212048	LOC101212048	1	0		1	101212048
CC	GO:0070013	intracellular organelle lumen	1/182	53/2244	0.989306	0.99978	101212048	LOC101212048	1	0		1	101212048
CC	GO:0005840	ribosome	9/182	207/2244	0.991212	0.99978	101203845/101219899/3429308/101210000/101207012/101204269/101220973/101215592/101206444	LOC101203845/LOC101219899/rps14/LOC101210000/LOC101207012/LOC101204269/LOC101220973/LOC101215592/LOC101206444	9	2	3429308/101215592	7	101203845/101219899/101210000/101207012/101204269/101220973/101206444
CC	GO:0043228	non-membrane-bounded organelle	13/182	288/2244	0.996288	0.99978	101203845/101219899/3429308/101205007/101205659/101210000/101207012/101215348/101204269/101220973/101215592/116406046/101206444	LOC101203845/LOC101219899/rps14/LOC101205007/LOC101205659/LOC101210000/LOC101207012/LOC101215348/LOC101204269/LOC101220973/LOC101215592/LOC116406046/LOC101206444	13	5	3429308/101205007/101205659/101215592/116406046	8	101203845/101219899/101210000/101207012/101215348/101204269/101220973/101206444
CC	GO:0043232	intracellular non-membrane-bounded organelle	13/182	288/2244	0.996288	0.99978	101203845/101219899/3429308/101205007/101205659/101210000/101207012/101215348/101204269/101220973/101215592/116406046/101206444	LOC101203845/LOC101219899/rps14/LOC101205007/LOC101205659/LOC101210000/LOC101207012/LOC101215348/LOC101204269/LOC101220973/LOC101215592/LOC116406046/LOC101206444	13	5	3429308/101205007/101205659/101215592/116406046	8	101203845/101219899/101210000/101207012/101215348/101204269/101220973/101206444
CC	GO:1990904	ribonucleoprotein complex	9/182	235/2244	0.998159	0.99978	101203845/101219899/3429308/101210000/101207012/101204269/101220973/101215592/101206444	LOC101203845/LOC101219899/rps14/LOC101210000/LOC101207012/LOC101204269/LOC101220973/LOC101215592/LOC101206444	9	2	3429308/101215592	7	101203845/101219899/101210000/101207012/101204269/101220973/101206444
CC	GO:0044422	organelle part	7/182	208/2244	0.998891	0.99978	101213217/101212337/101205007/101205659/101205555/101212048/101210035	LOC101213217/LOC101212337/LOC101205007/LOC101205659/LOC101205555/LOC101212048/LOC101210035	7	2	101205007/101205659	5	101213217/101212337/101205555/101212048/101210035
CC	GO:0044446	intracellular organelle part	7/182	208/2244	0.998891	0.99978	101213217/101212337/101205007/101205659/101205555/101212048/101210035	LOC101213217/LOC101212337/LOC101205007/LOC101205659/LOC101205555/LOC101212048/LOC101210035	7	2	101205007/101205659	5	101213217/101212337/101205555/101212048/101210035
CC	GO:1902494	catalytic complex	2/182	106/2244	0.998894	0.99978	101221089/101206275	LOC101221089/LOC101206275	2	1	101221089	1	101206275
CC	GO:0098796	membrane protein complex	3/182	132/2244	0.999108	0.99978	101213217/101212337/101205555	LOC101213217/LOC101212337/LOC101205555	3	0		3	101213217/101212337/101205555
CC	GO:0044444	cytoplasmic part	19/182	436/2244	0.99978	0.99978	101203845/101219899/101213217/101221089/101212337/3429308/101210000/101207012/101216440/101204269/116403946/101205555/101206293/101220973/116403949/101215592/101206444/101212048/101210035	LOC101203845/LOC101219899/LOC101213217/LOC101221089/LOC101212337/rps14/LOC101210000/LOC101207012/LOC101216440/LOC101204269/LOC116403946/LOC101205555/LOC101206293/LOC101220973/LOC116403949/LOC101215592/LOC101206444/LOC101212048/LOC101210035	19	4	101221089/3429308/101216440/101215592	15	101203845/101219899/101213217/101212337/101210000/101207012/101204269/116403946/101205555/101206293/101220973/116403949/101206444/101212048/101210035
MF	GO:0004553	hydrolase activity, hydrolyzing O-glycosyl compounds	30/692	236/9263	0.00278839	0.320213	101203271/101207227/101221789/101207903/101211924/101202924/101217842/101222731/101204921/101212207/101221682/101221739/101208641/101222401/101222005/101219670/101209366/101215687/101222408/101209348/101204709/101217094/101206292/101207915/101213455/101214838/101211792/101216943/101217992/101203587	LOC101203271/LOC101207227/LOC101221789/LOC101207903/LOC101211924/LOC101202924/XTH3/LOC101222731/LOC101204921/LOC101212207/LOC101221682/LOC101221739/LOC101208641/LOC101222401/LOC101222005/LOC101219670/LOC101209366/LOC101215687/LOC101222408/LOC101209348/LOC101204709/LOC101217094/LOC101206292/LOC101207915/LOC101213455/LOC101214838/LOC101211792/LOC101216943/LOC101217992/LOC101203587	30	10	101211924/101217842/101222731/101212207/101208641/101222005/101219670/101215687/101204709/101206292	20	101203271/101207227/101221789/101207903/101202924/101204921/101221682/101221739/101222401/101209366/101222408/101209348/101217094/101207915/101213455/101214838/101211792/101216943/101217992/101203587
MF	GO:0046982	protein heterodimerization activity	11/692	57/9263	0.00289193	0.320213	101218225/101207423/101207528/101218207/101219105/116406098/101219758/101209420/101219580/101213576/101214627	LOC101218225/LOC101207423/LOC101207528/LOC101218207/LOC101219105/LOC116406098/LOC101219758/LOC101209420/LOC101219580/LOC101213576/LOC101214627	11	5	101218225/101218207/116406098/101219758/101214627	6	101207423/101207528/101219105/101209420/101219580/101213576
MF	GO:0016798	hydrolase activity, acting on glycosyl bonds	30/692	250/9263	0.00648465	0.320213	101203271/101207227/101221789/101207903/101211924/101202924/101217842/101222731/101204921/101212207/101221682/101221739/101208641/101222401/101222005/101219670/101209366/101215687/101222408/101209348/101204709/101217094/101206292/101207915/101213455/101214838/101211792/101216943/101217992/101203587	LOC101203271/LOC101207227/LOC101221789/LOC101207903/LOC101211924/LOC101202924/XTH3/LOC101222731/LOC101204921/LOC101212207/LOC101221682/LOC101221739/LOC101208641/LOC101222401/LOC101222005/LOC101219670/LOC101209366/LOC101215687/LOC101222408/LOC101209348/LOC101204709/LOC101217094/LOC101206292/LOC101207915/LOC101213455/LOC101214838/LOC101211792/LOC101216943/LOC101217992/LOC101203587	30	10	101211924/101217842/101222731/101212207/101208641/101222005/101219670/101215687/101204709/101206292	20	101203271/101207227/101221789/101207903/101202924/101204921/101221682/101221739/101222401/101209366/101222408/101209348/101217094/101207915/101213455/101214838/101211792/101216943/101217992/101203587
MF	GO:0015116	sulfate transmembrane transporter activity	4/692	12/9263	0.0094106	0.320213	101202870/116403192/101203205/101219163	LOC101202870/LOC116403192/LOC101203205/LOC101219163	4	1	101219163	3	101202870/116403192/101203205
MF	GO:1901682	sulfur compound transmembrane transporter activity	4/692	12/9263	0.0094106	0.320213	101202870/116403192/101203205/101219163	LOC101202870/LOC116403192/LOC101203205/LOC101219163	4	1	101219163	3	101202870/116403192/101203205
MF	GO:0046527	glucosyltransferase activity	12/692	77/9263	0.0112757	0.320213	101213219/101213462/101217842/101221682/101221022/101205724/101208641/101211461/101209366/101211777/101214061/101217992	LOC101213219/LOC101213462/XTH3/LOC101221682/LOC101221022/LOC101205724/LOC101208641/LOC101211461/LOC101209366/LOC101211777/LOC101214061/LOC101217992	12	5	101213219/101213462/101217842/101208641/101211777	7	101221682/101221022/101205724/101211461/101209366/101214061/101217992
MF	GO:0000155	phosphorelay sensor kinase activity	4/692	13/9263	0.0128023	0.320213	101217761/101205786/101209777/116406348	LOC101217761/CS-ERS/LOC101209777/LOC116406348	4	0		4	101217761/101205786/101209777/116406348
MF	GO:0004673	protein histidine kinase activity	4/692	13/9263	0.0128023	0.320213	101217761/101205786/101209777/116406348	LOC101217761/CS-ERS/LOC101209777/LOC116406348	4	0		4	101217761/101205786/101209777/116406348
MF	GO:0016775	phosphotransferase activity, nitrogenous group as acceptor	4/692	13/9263	0.0128023	0.320213	101217761/101205786/101209777/116406348	LOC101217761/CS-ERS/LOC101209777/LOC116406348	4	0		4	101217761/101205786/101209777/116406348
MF	GO:0046983	protein dimerization activity	29/692	257/9263	0.0164697	0.320213	101214916/101206453/101216346/101215198/101218225/101210413/101213234/101207423/101207907/101204843/101207528/101218207/101218813/101204688/101204255/101219105/101204523/116406098/101216823/101219758/101208894/101220518/101222868/101209420/101205993/101219580/101213576/101209222/101214627	LOC101214916/LOC101206453/LOC101216346/LOC101215198/LOC101218225/LOC101210413/LOC101213234/LOC101207423/LOC101207907/LOC101204843/LOC101207528/LOC101218207/LOC101218813/LOC101204688/LOC101204255/LOC101219105/LOC101204523/LOC116406098/LOC101216823/LOC101219758/LOC101208894/LOC101220518/LOC101222868/LOC101209420/LOC101205993/LOC101219580/LOC101213576/LOC101209222/LOC101214627	29	18	101206453/101216346/101218225/101210413/101213234/101207907/101204843/101218207/101204688/101204255/101204523/116406098/101216823/101219758/101220518/101222868/101205993/101214627	11	101214916/101215198/101207423/101207528/101218813/101219105/101208894/101209420/101219580/101213576/101209222
MF	GO:0015103	inorganic anion transmembrane transporter activity	5/692	21/9263	0.0170808	0.320213	101202870/116403192/101209987/101203205/101219163	LOC101202870/LOC116403192/LOC101209987/LOC101203205/LOC101219163	5	2	101209987/101219163	3	101202870/116403192/101203205
MF	GO:0016462	pyrophosphatase activity	28/692	248/9263	0.0181008	0.320213	101204817/101206034/101219634/101208054/101213089/101221717/101215950/101218717/101219304/101221244/101221020/101215102/101210175/101204935/101210271/101214929/101221926/101218443/101206252/101221489/101212819/101217839/101214695/101215425/101203593/101219258/101211021/101206974	LOC101204817/LOC101206034/LOC101219634/LOC101208054/LOC101213089/PDR12/LOC101215950/LOC101218717/LOC101219304/LOC101221244/LOC101221020/LOC101215102/LOC101210175/LOC101204935/LOC101210271/LOC101214929/LOC101221926/LOC101218443/LOC101206252/LOC101221489/LOC101212819/LOC101217839/LOC101214695/LOC101215425/LOC101203593/LOC101219258/LOC101211021/LOC101206974	28	5	101219634/101208054/101210271/101214695/101206974	23	101204817/101206034/101213089/101221717/101215950/101218717/101219304/101221244/101221020/101215102/101210175/101204935/101214929/101221926/101218443/101206252/101221489/101212819/101217839/101215425/101203593/101219258/101211021
MF	GO:0004527	exonuclease activity	4/692	15/9263	0.0216916	0.320213	101214970/101213860/101208568/101211201	LOC101214970/LOC101213860/LOC101208568/LOC101211201	4	3	101214970/101213860/101211201	1	101208568
MF	GO:0003777	microtubule motor activity	8/692	47/9263	0.0217781	0.320213	101218717/101204935/101214929/101221926/101206252/101212819/101215425/101203593	LOC101218717/LOC101204935/LOC101214929/LOC101221926/LOC101206252/LOC101212819/LOC101215425/LOC101203593	8	0		8	101218717/101204935/101214929/101221926/101206252/101212819/101215425/101203593
MF	GO:0016818	hydrolase activity, acting on acid anhydrides, in phosphorus-containing anhydrides	28/692	252/9263	0.0219214	0.320213	101204817/101206034/101219634/101208054/101213089/101221717/101215950/101218717/101219304/101221244/101221020/101215102/101210175/101204935/101210271/101214929/101221926/101218443/101206252/101221489/101212819/101217839/101214695/101215425/101203593/101219258/101211021/101206974	LOC101204817/LOC101206034/LOC101219634/LOC101208054/LOC101213089/PDR12/LOC101215950/LOC101218717/LOC101219304/LOC101221244/LOC101221020/LOC101215102/LOC101210175/LOC101204935/LOC101210271/LOC101214929/LOC101221926/LOC101218443/LOC101206252/LOC101221489/LOC101212819/LOC101217839/LOC101214695/LOC101215425/LOC101203593/LOC101219258/LOC101211021/LOC101206974	28	5	101219634/101208054/101210271/101214695/101206974	23	101204817/101206034/101213089/101221717/101215950/101218717/101219304/101221244/101221020/101215102/101210175/101204935/101214929/101221926/101218443/101206252/101221489/101212819/101217839/101215425/101203593/101219258/101211021
MF	GO:0017111	nucleoside-triphosphatase activity	27/692	241/9263	0.0219258	0.320213	101204817/101206034/101219634/101208054/101213089/101221717/101215950/101218717/101219304/101221244/101221020/101215102/101210175/101204935/101210271/101214929/101221926/101218443/101206252/101221489/101212819/101217839/101214695/101215425/101203593/101219258/101211021	LOC101204817/LOC101206034/LOC101219634/LOC101208054/LOC101213089/PDR12/LOC101215950/LOC101218717/LOC101219304/LOC101221244/LOC101221020/LOC101215102/LOC101210175/LOC101204935/LOC101210271/LOC101214929/LOC101221926/LOC101218443/LOC101206252/LOC101221489/LOC101212819/LOC101217839/LOC101214695/LOC101215425/LOC101203593/LOC101219258/LOC101211021	27	4	101219634/101208054/101210271/101214695	23	101204817/101206034/101213089/101221717/101215950/101218717/101219304/101221244/101221020/101215102/101210175/101204935/101214929/101221926/101218443/101206252/101221489/101212819/101217839/101215425/101203593/101219258/101211021
MF	GO:0016817	hydrolase activity, acting on acid anhydrides	28/692	253/9263	0.0229689	0.320213	101204817/101206034/101219634/101208054/101213089/101221717/101215950/101218717/101219304/101221244/101221020/101215102/101210175/101204935/101210271/101214929/101221926/101218443/101206252/101221489/101212819/101217839/101214695/101215425/101203593/101219258/101211021/101206974	LOC101204817/LOC101206034/LOC101219634/LOC101208054/LOC101213089/PDR12/LOC101215950/LOC101218717/LOC101219304/LOC101221244/LOC101221020/LOC101215102/LOC101210175/LOC101204935/LOC101210271/LOC101214929/LOC101221926/LOC101218443/LOC101206252/LOC101221489/LOC101212819/LOC101217839/LOC101214695/LOC101215425/LOC101203593/LOC101219258/LOC101211021/LOC101206974	28	5	101219634/101208054/101210271/101214695/101206974	23	101204817/101206034/101213089/101221717/101215950/101218717/101219304/101221244/101221020/101215102/101210175/101204935/101214929/101221926/101218443/101206252/101221489/101212819/101217839/101215425/101203593/101219258/101211021
MF	GO:0020037	heme binding	29/692	271/9263	0.0311281	0.348849	101206763/101215975/101213285/101217610/101211829/101212611/101216159/101217830/101213974/101221526/101207160/101214516/101214065/101217543/101213457/101216216/101216733/101221151/116402471/101203032/101208814/101209244/101204559/101221732/101218397/101217567/101204961/101217781/101211324	LOC101206763/LOC101215975/LOC101213285/LOC101217610/LOC101211829/LOC101212611/LOC101216159/LOC101217830/CYP/LOC101221526/LOC101207160/LOC101214516/LOC101214065/LOC101217543/LOC101213457/LOC101216216/LOC101216733/LOC101221151/LOC116402471/LOC101203032/LOC101208814/LOC101209244/LOC101204559/AOS/LOC101218397/LOC101217567/LOC101204961/LOC101217781/HPL	29	8	101213285/101211829/101212611/101217830/101213974/116402471/101204559/101211324	21	101206763/101215975/101217610/101216159/101221526/101207160/101214516/101214065/101217543/101213457/101216216/101216733/101221151/101203032/101208814/101209244/101221732/101218397/101217567/101204961/101217781
MF	GO:0008509	anion transmembrane transporter activity	6/692	33/9263	0.0332307	0.348849	101202870/116403192/101209987/101203205/101217853/101219163	LOC101202870/LOC116403192/LOC101209987/LOC101203205/LOC101217853/LOC101219163	6	3	101209987/101217853/101219163	3	101202870/116403192/101203205
MF	GO:0008443	phosphofructokinase activity	3/692	10/9263	0.0335009	0.348849	101215219/101202739/101220704	LOC101215219/LOC101202739/LOC101220704	3	0		3	101215219/101202739/101220704
MF	GO:0016638	oxidoreductase activity, acting on the CH-NH2 group of donors	3/692	10/9263	0.0335009	0.348849	101213059/101212818/101210998	LOC101213059/LOC101212818/LOC101210998	3	3	101213059/101212818/101210998	0
MF	GO:0019200	carbohydrate kinase activity	3/692	10/9263	0.0335009	0.348849	101215219/101202739/101220704	LOC101215219/LOC101202739/LOC101220704	3	0		3	101215219/101202739/101220704
MF	GO:0046906	tetrapyrrole binding	29/692	273/9263	0.0338545	0.348849	101206763/101215975/101213285/101217610/101211829/101212611/101216159/101217830/101213974/101221526/101207160/101214516/101214065/101217543/101213457/101216216/101216733/101221151/116402471/101203032/101208814/101209244/101204559/101221732/101218397/101217567/101204961/101217781/101211324	LOC101206763/LOC101215975/LOC101213285/LOC101217610/LOC101211829/LOC101212611/LOC101216159/LOC101217830/CYP/LOC101221526/LOC101207160/LOC101214516/LOC101214065/LOC101217543/LOC101213457/LOC101216216/LOC101216733/LOC101221151/LOC116402471/LOC101203032/LOC101208814/LOC101209244/LOC101204559/AOS/LOC101218397/LOC101217567/LOC101204961/LOC101217781/HPL	29	8	101213285/101211829/101212611/101217830/101213974/116402471/101204559/101211324	21	101206763/101215975/101217610/101216159/101221526/101207160/101214516/101214065/101217543/101213457/101216216/101216733/101221151/101203032/101208814/101209244/101221732/101218397/101217567/101204961/101217781
MF	GO:0003774	motor activity	8/692	52/9263	0.0376552	0.371845	101218717/101204935/101214929/101221926/101206252/101212819/101215425/101203593	LOC101218717/LOC101204935/LOC101214929/LOC101221926/LOC101206252/LOC101212819/LOC101215425/LOC101203593	8	0		8	101218717/101204935/101214929/101221926/101206252/101212819/101215425/101203593
MF	GO:0016160	amylase activity	3/692	11/9263	0.0435654	0.410138	101221739/101222005/101213455	LOC101221739/LOC101222005/LOC101213455	3	1	101222005	2	101221739/101213455
MF	GO:0016762	xyloglucan:xyloglucosyl transferase activity	5/692	27/9263	0.0468923	0.410138	101217842/101221682/101208641/101209366/101217992	XTH3/LOC101221682/LOC101208641/LOC101209366/LOC101217992	5	2	101217842/101208641	3	101221682/101209366/101217992
MF	GO:0004857	enzyme inhibitor activity	9/692	64/9263	0.0471373	0.410138	101205557/101220821/101207401/101213265/101218163/101215012/101217635/101212388/101206058	LOC101205557/LOC101220821/LOC101207401/LOC101213265/LOC101218163/LOC101215012/LOC101217635/LOC101212388/LOC101206058	9	5	101220821/101207401/101213265/101215012/101212388	4	101205557/101218163/101217635/101206058
MF	GO:0008017	microtubule binding	8/692	55/9263	0.0501857	0.410138	101218717/101204935/101214929/101221926/101206252/101212819/101215425/101203593	LOC101218717/LOC101204935/LOC101214929/LOC101221926/LOC101206252/LOC101212819/LOC101215425/LOC101203593	8	0		8	101218717/101204935/101214929/101221926/101206252/101212819/101215425/101203593
MF	GO:0052689	carboxylic ester hydrolase activity	8/692	55/9263	0.0501857	0.410138	101205557/101220288/101220821/101203653/101217414/101217635/101212388/101211723	LOC101205557/LOC101220288/LOC101220821/LOC101203653/LOC101217414/LOC101217635/LOC101212388/LOC101211723	8	3	101220288/101220821/101212388	5	101205557/101203653/101217414/101217635/101211723
MF	GO:0005215	transporter activity	45/692	472/9263	0.0520534	0.411222	101216756/101216085/101202870/101215366/101222356/101223175/101219304/101220534/101214884/101214754/101215102/116403192/101203764/101210018/101217163/101209987/101217968/101203205/101210814/101215145/101221620/101217853/101207824/101213983/101216286/101207199/101203402/101203724/101221552/101218304/105435643/101208346/101203925/101214142/101205555/101214695/101215315/101208396/101221154/101212257…	LOC101216756/PIP2-1/LOC101202870/PIP2-3/LOC101222356/LOC101223175/LOC101219304/LOC101220534/PIP2-2/PIP1-1/LOC101215102/LOC116403192/LOC101203764/LOC101210018/LOC101217163/LOC101209987/LOC101217968/LOC101203205/LOC101210814/AQUAPORIN/LOC101221620/LOC101217853/NRT1.4A/LOC101213983/LOC101216286/LOC101207199/LOC101203402/LOC101203724/LOC101221552/LOC101218304/LOC105435643/LOC101208346/LOC101203925/LO…	45	17	101223175/101220534/101210018/101217163/101209987/101221620/101217853/101213983/101207199/101203724/101208346/101214695/101215315/101221154/101212257/101219163/101209937	28	101216756/101216085/101202870/101215366/101222356/101219304/101214884/101214754/101215102/116403192/101203764/101217968/101203205/101210814/101215145/101207824/101216286/101203402/101221552/101218304/105435643/101203925/101214142/101205555/101208396/101218141/101215746/101222104
MF	GO:0008408	3'-5' exonuclease activity	3/692	12/9263	0.0549503	0.420104	101214970/101208568/101211201	LOC101214970/LOC101208568/LOC101211201	3	2	101214970/101211201	1	101208568
MF	GO:0016779	nucleotidyltransferase activity	11/692	87/9263	0.0584145	0.432632	101221562/101203889/101217274/101217340/101212812/101213105/101211496/101208605/101208568/101208904/101211201	LOC101221562/LOC101203889/LOC101217274/LOC101217340/LOC101212812/LOC101213105/LOC101211496/LOC101208605/LOC101208568/LOC101208904/LOC101211201	11	4	101203889/101217340/101211496/101211201	7	101221562/101217274/101212812/101213105/101208605/101208568/101208904
MF	GO:0030234	enzyme regulator activity	12/692	98/9263	0.0606076	0.435273	101205557/101220821/101207401/101217929/101213265/101204120/101218163/101215012/101217635/101212388/101220266/101206058	LOC101205557/LOC101220821/LOC101207401/LOC101217929/LOC101213265/LOC101204120/LOC101218163/LOC101215012/LOC101217635/LOC101212388/LOC101220266/LOC101206058	12	5	101220821/101207401/101213265/101215012/101212388	7	101205557/101217929/101204120/101218163/101217635/101220266/101206058
MF	GO:0005506	iron ion binding	23/692	220/9263	0.0628172	0.43599	101206763/101215975/101213285/101217610/101211829/101212611/101216159/101217830/101213974/101203441/101221526/101207160/101214516/101213457/101216216/101216733/116402471/101208814/101209244/101204559/101221732/101204961/101211324	LOC101206763/LOC101215975/LOC101213285/LOC101217610/LOC101211829/LOC101212611/LOC101216159/LOC101217830/CYP/LOC101203441/LOC101221526/LOC101207160/LOC101214516/LOC101213457/LOC101216216/LOC101216733/LOC116402471/LOC101208814/LOC101209244/LOC101204559/AOS/LOC101204961/HPL	23	8	101213285/101211829/101212611/101217830/101213974/116402471/101204559/101211324	15	101206763/101215975/101217610/101216159/101203441/101221526/101207160/101214516/101213457/101216216/101216733/101208814/101209244/101221732/101204961
MF	GO:0016746	transferase activity, transferring acyl groups	18/692	165/9263	0.0667327	0.43599	101214919/101217359/101222079/101218131/101209539/101205258/101214239/101220730/116401813/101218433/101217710/101207100/101204808/101212707/101215101/101221758/101214523/101215151	LOC101214919/LOC101217359/LOC101222079/LOC101218131/LOC101209539/LOC101205258/LOC101214239/LOC101220730/LOC116401813/LOC101218433/LOC101217710/LOC101207100/LOC101204808/LOC101212707/LOC101215101/LOC101221758/LOC101214523/LOC101215151	18	5	101214919/101217710/101207100/101212707/101214523	13	101217359/101222079/101218131/101209539/101205258/101214239/101220730/116401813/101218433/101204808/101215101/101221758/101215151
MF	GO:0051087	chaperone binding	3/692	13/9263	0.0675947	0.43599	101211509/101212461/101220266	LOC101211509/LOC101212461/LOC101220266	3	2	101211509/101212461	1	101220266
MF	GO:0035251	UDP-glucosyltransferase activity	7/692	49/9263	0.0700309	0.43599	101213219/101213462/101221022/101205724/101211461/101211777/101214061	LOC101213219/LOC101213462/LOC101221022/LOC101205724/LOC101211461/LOC101211777/LOC101214061	7	3	101213219/101213462/101211777	4	101221022/101205724/101211461/101214061
MF	GO:0015631	tubulin binding	8/692	59/9263	0.0706747	0.43599	101218717/101204935/101214929/101221926/101206252/101212819/101215425/101203593	LOC101218717/LOC101204935/LOC101214929/LOC101221926/LOC101206252/LOC101212819/LOC101215425/LOC101203593	8	0		8	101218717/101204935/101214929/101221926/101206252/101212819/101215425/101203593
MF	GO:0016887	ATPase activity	15/692	134/9263	0.0744728	0.43599	101206034/101208054/101213089/101221717/101215950/101219304/101221244/101215102/101210175/101210271/101221489/101217839/101214695/101219258/101211021	LOC101206034/LOC101208054/LOC101213089/PDR12/LOC101215950/LOC101219304/LOC101221244/LOC101215102/LOC101210175/LOC101210271/LOC101221489/LOC101217839/LOC101214695/LOC101219258/LOC101211021	15	3	101208054/101210271/101214695	12	101206034/101213089/101221717/101215950/101219304/101221244/101215102/101210175/101221489/101217839/101219258/101211021
MF	GO:0016759	cellulose synthase activity	5/692	31/9263	0.0774523	0.43599	101213219/101213462/101205724/101211777/101214061	LOC101213219/LOC101213462/LOC101205724/LOC101211777/LOC101214061	5	3	101213219/101213462/101211777	2	101205724/101214061
MF	GO:0016760	cellulose synthase (UDP-forming) activity	5/692	31/9263	0.0774523	0.43599	101213219/101213462/101205724/101211777/101214061	LOC101213219/LOC101213462/LOC101205724/LOC101211777/LOC101214061	5	3	101213219/101213462/101211777	2	101205724/101214061
MF	GO:0098772	molecular function regulator	13/692	113/9263	0.0780546	0.43599	101205557/101220821/101207401/101217929/101213265/101204120/101218163/101215012/101217635/101212388/101220266/101206058/101212682	LOC101205557/LOC101220821/LOC101207401/LOC101217929/LOC101213265/LOC101204120/LOC101218163/LOC101215012/LOC101217635/LOC101212388/LOC101220266/LOC101206058/LOC101212682	13	5	101220821/101207401/101213265/101215012/101212388	8	101205557/101217929/101204120/101218163/101217635/101220266/101206058/101212682
MF	GO:0016705	oxidoreductase activity, acting on paired donors, with incorporation or reduction of molecular oxygen	23/692	226/9263	0.0794982	0.43599	101206763/101215975/101213285/101217610/101211829/101212611/101216159/101217830/101213974/101221526/101207160/101214516/101213457/101216216/101216733/116402471/101208814/101209244/101210582/101204559/101221732/101204961/101211324	LOC101206763/LOC101215975/LOC101213285/LOC101217610/LOC101211829/LOC101212611/LOC101216159/LOC101217830/CYP/LOC101221526/LOC101207160/LOC101214516/LOC101213457/LOC101216216/LOC101216733/LOC116402471/LOC101208814/LOC101209244/LOC101210582/LOC101204559/AOS/LOC101204961/HPL	23	8	101213285/101211829/101212611/101217830/101213974/116402471/101204559/101211324	15	101206763/101215975/101217610/101216159/101221526/101207160/101214516/101213457/101216216/101216733/101208814/101209244/101210582/101221732/101204961
MF	GO:0010333	terpene synthase activity	3/692	14/9263	0.081425	0.43599	101215070/101217224/101219443	LOC101215070/LOC101217224/LOC101219443	3	2	101215070/101219443	1	101217224
MF	GO:0016788	hydrolase activity, acting on ester bonds	26/692	262/9263	0.0827829	0.43599	101217360/101205557/101216680/101215446/101220288/101220821/101214473/101205919/101214970/101214486/101203653/101210955/101209542/101210513/101217414/101217635/101215456/101220274/101212388/101213860/101208568/101220198/101211201/101204819/101211723/101220751	LOC101217360/LOC101205557/LOC101216680/LOC101215446/LOC101220288/LOC101220821/LOC101214473/LOC101205919/LOC101214970/LOC101214486/LOC101203653/LOC101210955/LOC101209542/LOC101210513/LOC101217414/LOC101217635/LOC101215456/LOC101220274/LOC101212388/LOC101213860/LOC101208568/LOC101220198/LOC101211201/LOC101204819/LOC101211723/LOC101220751	26	10	101217360/101220288/101220821/101214970/101215456/101220274/101212388/101213860/101211201/101220751	16	101205557/101216680/101215446/101214473/101205919/101214486/101203653/101210955/101209542/101210513/101217414/101217635/101208568/101220198/101204819/101211723
MF	GO:0140097	catalytic activity, acting on DNA	6/692	44/9263	0.106996	0.551264	101215950/101217839/101213860/101208568/101211021/101211201	LOC101215950/LOC101217839/LOC101213860/LOC101208568/LOC101211021/LOC101211201	6	2	101213860/101211201	4	101215950/101217839/101208568/101211021
MF	GO:0016838	carbon-oxygen lyase activity, acting on phosphates	3/692	16/9263	0.112305	0.566306	101215070/101217224/101219443	LOC101215070/LOC101217224/LOC101219443	3	2	101215070/101219443	1	101217224
MF	GO:0030599	pectinesterase activity	5/692	36/9263	0.127405	0.629063	101205557/101220821/101217414/101217635/101212388	LOC101205557/LOC101220821/LOC101217414/LOC101217635/LOC101212388	5	2	101220821/101212388	3	101205557/101217414/101217635
MF	GO:0016765	transferase activity, transferring alkyl or aryl (other than methyl) groups	4/692	27/9263	0.138514	0.669958	101207177/101220717/101216457/101205649	LOC101207177/LOC101220717/LOC101216457/LOC101205649	4	1	101205649	3	101207177/101220717/101216457
MF	GO:0008094	DNA-dependent ATPase activity	3/692	18/9263	0.146864	0.696137	101215950/101217839/101211021	LOC101215950/LOC101217839/LOC101211021	3	0		3	101215950/101217839/101211021
MF	GO:0015035	protein disulfide oxidoreductase activity	5/692	38/9263	0.150677	0.700207	101208448/101205594/101203007/101221729/101220333	LOC101208448/LOC101205594/LOC101203007/LOC101221729/LOC101220333	5	4	101208448/101205594/101203007/101221729	1	101220333
MF	GO:0004518	nuclease activity	7/692	60/9263	0.158357	0.721741	101205919/101214970/101220274/101213860/101208568/101211201/101204819	LOC101205919/LOC101214970/LOC101220274/LOC101213860/LOC101208568/LOC101211201/LOC101204819	7	4	101214970/101220274/101213860/101211201	3	101205919/101208568/101204819
MF	GO:0008092	cytoskeletal protein binding	9/692	83/9263	0.165383	0.725938	101216210/101218717/101204935/101214929/101221926/101206252/101212819/101215425/101203593	LOC101216210/LOC101218717/LOC101204935/LOC101214929/LOC101221926/LOC101206252/LOC101212819/LOC101215425/LOC101203593	9	0		9	101216210/101218717/101204935/101214929/101221926/101206252/101212819/101215425/101203593
MF	GO:0000287	magnesium ion binding	6/692	50/9263	0.167164	0.725938	101215070/101206887/101217224/101220786/101206620/101219443	LOC101215070/LOC101206887/LOC101217224/LOC101220786/LOC101206620/LOC101219443	6	2	101215070/101219443	4	101206887/101217224/101220786/101206620
MF	GO:0004659	prenyltransferase activity	2/692	10/9263	0.168467	0.725938	101220717/101216457	LOC101220717/LOC101216457	2	0		2	101220717/101216457
MF	GO:0008238	exopeptidase activity	5/692	40/9263	0.17558	0.743079	101215771/101215538/116402232/101220830/101209256	LOC101215771/LOC101215538/LOC116402232/LOC101220830/LOC101209256	5	4	101215771/101215538/101220830/101209256	1	116402232
MF	GO:0016829	lyase activity	11/692	108/9263	0.182019	0.756818	116406341/101214621/101215070/101217224/101208329/101206363/101213380/101216256/101215090/101222969/101219443	LOC116406341/LOC101214621/LOC101215070/LOC101217224/LOC101208329/LOC101206363/LOC101213380/PPC3/LOC101215090/LOC101222969/LOC101219443	11	6	116406341/101215070/101213380/101215090/101222969/101219443	5	101214621/101217224/101208329/101206363/101216256
MF	GO:0008483	transaminase activity	2/692	11/9263	0.196222	0.775079	101208662/101219660	LOC101208662/LOC101219660	2	1	101208662	1	101219660
MF	GO:0016769	transferase activity, transferring nitrogenous groups	2/692	11/9263	0.196222	0.775079	101208662/101219660	LOC101208662/LOC101219660	2	1	101208662	1	101219660
MF	GO:0034061	DNA polymerase activity	2/692	11/9263	0.196222	0.775079	101208568/101211201	LOC101208568/LOC101211201	2	1	101211201	1	101208568
MF	GO:0008194	UDP-glycosyltransferase activity	9/692	88/9263	0.209564	0.814203	101213219/101213462/101221022/101205724/101211461/101210480/101211777/101214061/101222690	LOC101213219/LOC101213462/LOC101221022/LOC101205724/LOC101211461/LOC101210480/LOC101211777/LOC101214061/LOC101222690	9	4	101213219/101213462/101210480/101211777	5	101221022/101205724/101211461/101214061/101222690
MF	GO:0004003	ATP-dependent DNA helicase activity	2/692	12/9263	0.224477	0.814203	101217839/101211021	LOC101217839/LOC101211021	2	0		2	101217839/101211021
MF	GO:0008026	ATP-dependent helicase activity	2/692	12/9263	0.224477	0.814203	101217839/101211021	LOC101217839/LOC101211021	2	0		2	101217839/101211021
MF	GO:0070035	purine NTP-dependent helicase activity	2/692	12/9263	0.224477	0.814203	101217839/101211021	LOC101217839/LOC101211021	2	0		2	101217839/101211021
MF	GO:0016701	oxidoreductase activity, acting on single donors with incorporation of molecular oxygen	5/692	44/9263	0.229472	0.814203	101206327/105434554/101216318/101209041/101222003	LOC101206327/LOX2/LOC101216318/LOC101209041/LOC101222003	5	2	101206327/105434554	3	101216318/101209041/101222003
MF	GO:0038023	signaling receptor activity	4/692	33/9263	0.230175	0.814203	101217761/101205786/101209777/116406348	LOC101217761/CS-ERS/LOC101209777/LOC116406348	4	0		4	101217761/101205786/101209777/116406348
MF	GO:0060089	molecular transducer activity	4/692	33/9263	0.230175	0.814203	101217761/101205786/101209777/116406348	LOC101217761/CS-ERS/LOC101209777/LOC116406348	4	0		4	101217761/101205786/101209777/116406348
MF	GO:0004470	malic enzyme activity	3/692	23/9263	0.244367	0.827357	116405070/116406426/116403315	LOC116405070/LOC116406426/LOC116403315	3	2	116405070/116403315	1	116406426
MF	GO:0004471	malate dehydrogenase (decarboxylating) (NAD+) activity	3/692	23/9263	0.244367	0.827357	116405070/116406426/116403315	LOC116405070/LOC116406426/LOC116403315	3	2	116405070/116403315	1	116406426
MF	GO:0016615	malate dehydrogenase activity	3/692	23/9263	0.244367	0.827357	116405070/116406426/116403315	LOC116405070/LOC116406426/LOC116403315	3	2	116405070/116403315	1	116406426
MF	GO:0005507	copper ion binding	5/692	46/9263	0.258032	0.839103	101213059/101218482/101212563/101212818/101210998	LOC101213059/LOC101218482/LOC101212563/LOC101212818/LOC101210998	5	3	101213059/101212818/101210998	2	101218482/101212563
MF	GO:0016702	oxidoreductase activity, acting on single donors with incorporation of molecular oxygen, incorporation of two atoms of oxygen	4/692	35/9263	0.263553	0.839103	101206327/105434554/101216318/101209041	LOC101206327/LOX2/LOC101216318/LOC101209041	4	2	101206327/105434554	2	101216318/101209041
MF	GO:0016747	transferase activity, transferring acyl groups other than amino-acyl groups	12/692	130/9263	0.264207	0.839103	101214919/101217359/101222079/101218131/101214239/116401813/101218433/101217710/101207100/101204808/101212707/101215101	LOC101214919/LOC101217359/LOC101222079/LOC101218131/LOC101214239/LOC116401813/LOC101218433/LOC101217710/LOC101207100/LOC101204808/LOC101212707/LOC101215101	12	4	101214919/101217710/101207100/101212707	8	101217359/101222079/101218131/101214239/116401813/101218433/101204808/101215101
MF	GO:0004185	serine-type carboxypeptidase activity	3/692	24/9263	0.265043	0.839103	116402232/101220830/101209256	LOC116402232/LOC101220830/LOC101209256	3	2	101220830/101209256	1	116402232
MF	GO:0016616	oxidoreductase activity, acting on the CH-OH group of donors, NAD or NADP as acceptor	9/692	94/9263	0.267975	0.839103	101206249/101202770/116405070/101213380/101211790/116406426/101210295/116403315/101221189	LOC101206249/LOC101202770/LOC116405070/LOC101213380/LOC101211790/LOC116406426/LOC101210295/LOC116403315/LOC101221189	9	6	101206249/116405070/101213380/101211790/101210295/116403315	3	101202770/116406426/101221189
MF	GO:0016614	oxidoreductase activity, acting on CH-OH group of donors	13/692	143/9263	0.270415	0.839103	101206249/101202770/116405070/101213380/101205454/101219817/101211790/116406426/101216524/101210295/116403315/101221189/101209166	LOC101206249/LOC101202770/LOC116405070/LOC101213380/LOC101205454/LOC101219817/LOC101211790/LOC116406426/LOC101216524/LOC101210295/LOC116403315/LOC101221189/LOC101209166	13	7	101206249/116405070/101213380/101211790/101216524/101210295/116403315	6	101202770/101205454/101219817/116406426/101221189/101209166
MF	GO:0016835	carbon-oxygen lyase activity	5/692	47/9263	0.27262	0.839103	101215070/101217224/101213380/101215090/101219443	LOC101215070/LOC101217224/LOC101213380/LOC101215090/LOC101219443	5	4	101215070/101213380/101215090/101219443	1	101217224
MF	GO:0003924	GTPase activity	4/692	37/9263	0.297753	0.864618	101204817/101219634/101221020/101218443	LOC101204817/LOC101219634/LOC101221020/LOC101218443	4	1	101219634	3	101204817/101221020/101218443
MF	GO:0051082	unfolded protein binding	4/692	37/9263	0.297753	0.864618	101207890/101221822/101203607/101214200	LOC101207890/LOC101221822/LOC101203607/LOC101214200	4	1	101214200	3	101207890/101221822/101203607
MF	GO:0051213	dioxygenase activity	4/692	37/9263	0.297753	0.864618	101206327/105434554/101216318/101209041	LOC101206327/LOX2/LOC101216318/LOC101209041	4	2	101206327/105434554	2	101216318/101209041
MF	GO:0015036	disulfide oxidoreductase activity	5/692	49/9263	0.302273	0.864618	101208448/101205594/101203007/101221729/101220333	LOC101208448/LOC101205594/LOC101203007/LOC101221729/LOC101220333	5	4	101208448/101205594/101203007/101221729	1	101220333
MF	GO:0004180	carboxypeptidase activity	3/692	26/9263	0.306914	0.864618	116402232/101220830/101209256	LOC116402232/LOC101220830/LOC101209256	3	2	101220830/101209256	1	116402232
MF	GO:0003678	DNA helicase activity	2/692	15/9263	0.310095	0.864618	101217839/101211021	LOC101217839/LOC101211021	2	0		2	101217839/101211021
MF	GO:0004674	protein serine/threonine kinase activity	2/692	15/9263	0.310095	0.864618	116402699/101217751	LOC116402699/LOC101217751	2	0		2	116402699/101217751
MF	GO:0008173	RNA methyltransferase activity	2/692	15/9263	0.310095	0.864618	101215920/101219631	LOC101215920/LOC101219631	2	1	101219631	1	101215920
MF	GO:0016758	transferase activity, transferring hexosyl groups	22/692	264/9263	0.327039	0.891654	101213219/101213462/101217842/101202851/101221682/101221022/101207420/101205724/101208641/101216580/101211461/116402074/101209366/101210480/101211777/101210034/101212484/101214061/101213363/101222690/101217992/101218917	LOC101213219/LOC101213462/XTH3/LOC101202851/LOC101221682/LOC101221022/LOC101207420/LOC101205724/LOC101208641/LOC101216580/LOC101211461/LOC116402074/LOC101209366/LOC101210480/LOC101211777/LOC101210034/LOC101212484/LOC101214061/LOC101213363/LOC101222690/LOC101217992/LOC101218917	22	11	101213219/101213462/101217842/101207420/101208641/101216580/116402074/101210480/101211777/101210034/101212484	11	101202851/101221682/101221022/101205724/101211461/101209366/101214061/101213363/101222690/101217992/101218917
MF	GO:0042623	ATPase activity, coupled	7/692	75/9263	0.327316	0.891654	101215950/101219304/101215102/101210271/101217839/101214695/101211021	LOC101215950/LOC101219304/LOC101215102/LOC101210271/LOC101217839/LOC101214695/LOC101211021	7	2	101210271/101214695	5	101215950/101219304/101215102/101217839/101211021
MF	GO:0004871	signal transducer activity	5/692	51/9263	0.332386	0.895177	101217761/101205786/101209777/101213011/116406348	LOC101217761/CS-ERS/LOC101209777/LOC101213011/LOC116406348	5	0		5	101217761/101205786/101209777/101213011/116406348
MF	GO:0070008	serine-type exopeptidase activity	3/692	28/9263	0.349002	0.929366	116402232/101220830/101209256	LOC116402232/LOC101220830/LOC101209256	3	2	101220830/101209256	1	116402232
MF	GO:0015297	antiporter activity	6/692	65/9263	0.357538	0.941516	101203764/101213983/101207199/101203402/101208346/101221154	LOC101203764/LOC101213983/LOC101207199/LOC101203402/LOC101208346/LOC101221154	6	4	101213983/101207199/101208346/101221154	2	101203764/101203402
MF	GO:0003899	DNA-directed 5'-3' RNA polymerase activity	4/692	41/9263	0.367307	0.946215	101203889/101217274/101212812/101213105	LOC101203889/LOC101217274/LOC101212812/LOC101213105	4	1	101203889	3	101217274/101212812/101213105
MF	GO:0015238	drug transmembrane transporter activity	4/692	41/9263	0.367307	0.946215	101203764/101207199/101203402/101221154	LOC101203764/LOC101207199/LOC101203402/LOC101221154	4	2	101207199/101221154	2	101203764/101203402
MF	GO:0016627	oxidoreductase activity, acting on the CH-CH group of donors	3/692	30/9263	0.390807	0.953709	101209094/101202899/101215230	LOC101209094/LOC101202899/LOC101215230	3	3	101209094/101202899/101215230	0
MF	GO:0016757	transferase activity, transferring glycosyl groups	26/692	326/9263	0.392729	0.953709	101213219/101213462/101217842/101202851/101221682/101221022/101207420/101205724/101208641/101216580/101211461/116402074/101209366/101210480/101206067/101211777/101210034/101206917/101212484/101214061/101213363/101203797/101222690/101208382/101217992/101218917	LOC101213219/LOC101213462/XTH3/LOC101202851/LOC101221682/LOC101221022/LOC101207420/LOC101205724/LOC101208641/LOC101216580/LOC101211461/LOC116402074/LOC101209366/LOC101210480/LOC101206067/LOC101211777/LOC101210034/LOC101206917/LOC101212484/LOC101214061/LOC101213363/LOC101203797/LOC101222690/GOLS/LOC101217992/LOC101218917	26	12	101213219/101213462/101217842/101207420/101208641/101216580/116402074/101210480/101211777/101210034/101206917/101212484	14	101202851/101221682/101221022/101205724/101211461/101209366/101206067/101214061/101213363/101203797/101222690/101208382/101217992/101218917
MF	GO:0140098	catalytic activity, acting on RNA	12/692	146/9263	0.408971	0.953709	101203889/101205919/101210547/101217274/101206917/101212812/101220274/101215920/101213105/101219631/101220233/101211723	LOC101203889/LOC101205919/LOC101210547/LOC101217274/LOC101206917/LOC101212812/LOC101220274/LOC101215920/LOC101213105/LOC101219631/LOC101220233/LOC101211723	12	6	101203889/101210547/101206917/101220274/101219631/101220233	6	101205919/101217274/101212812/101215920/101213105/101211723
MF	GO:0009982	pseudouridine synthase activity	2/692	19/9263	0.420531	0.953709	101203320/101211896	LOC101203320/LOC101211896	2	1	101211896	1	101203320
MF	GO:0015291	secondary active transmembrane transporter activity	6/692	70/9263	0.425831	0.953709	101203764/101213983/101207199/101203402/101208346/101221154	LOC101203764/LOC101213983/LOC101207199/LOC101203402/LOC101208346/LOC101221154	6	4	101213983/101207199/101208346/101221154	2	101203764/101203402
MF	GO:0016667	oxidoreductase activity, acting on a sulfur group of donors	5/692	58/9263	0.438533	0.953709	101208448/101205594/101203007/101221729/101220333	LOC101208448/LOC101205594/LOC101203007/LOC101221729/LOC101220333	5	4	101208448/101205594/101203007/101221729	1	101220333
MF	GO:0034062	5'-3' RNA polymerase activity	4/692	47/9263	0.470283	0.953709	101203889/101217274/101212812/101213105	LOC101203889/LOC101217274/LOC101212812/LOC101213105	4	1	101203889	3	101217274/101212812/101213105
MF	GO:0097747	RNA polymerase activity	4/692	47/9263	0.470283	0.953709	101203889/101217274/101212812/101213105	LOC101203889/LOC101217274/LOC101212812/LOC101213105	4	1	101203889	3	101217274/101212812/101213105
MF	GO:0008047	enzyme activator activity	2/692	21/9263	0.472338	0.953709	101217929/101220266	LOC101217929/LOC101220266	2	0		2	101217929/101220266
MF	GO:0009055	electron transfer activity	9/692	115/9263	0.492986	0.953709	101218428/101222508/101205594/101203007/101221729/101218690/101205803/101220333/101212623	LOC101218428/LOC101222508/LOC101205594/LOC101203007/LOC101221729/LOC101218690/LOC101205803/LOC101220333/LOC101212623	9	3	101205594/101203007/101221729	6	101218428/101222508/101218690/101205803/101220333/101212623
MF	GO:0003743	translation initiation factor activity	2/692	23/9263	0.521252	0.953709	101219651/101214334	LOC101219651/LOC101214334	2	2	101219651/101214334	0
MF	GO:0045735	nutrient reservoir activity	2/692	23/9263	0.521252	0.953709	101218178/101203210	LOC101218178/LOC101203210	2	1	101203210	1	101218178
MF	GO:0140101	catalytic activity, acting on a tRNA	5/692	64/9263	0.526324	0.953709	101210547/101206917/101219631/101220233/101211723	LOC101210547/LOC101206917/LOC101219631/LOC101220233/LOC101211723	5	4	101210547/101206917/101219631/101220233	1	101211723
MF	GO:0004812	aminoacyl-tRNA ligase activity	3/692	37/9263	0.529448	0.953709	101210547/101220233/101211723	LOC101210547/LOC101220233/LOC101211723	3	2	101210547/101220233	1	101211723
MF	GO:0016875	ligase activity, forming carbon-oxygen bonds	3/692	37/9263	0.529448	0.953709	101210547/101220233/101211723	LOC101210547/LOC101220233/LOC101211723	3	2	101210547/101220233	1	101211723
MF	GO:0004525	ribonuclease III activity	1/692	10/9263	0.540138	0.953709	101205919	LOC101205919	1	0		1	101205919
MF	GO:0004568	chitinase activity	1/692	10/9263	0.540138	0.953709	101222731	LOC101222731	1	1	101222731	0
MF	GO:0016811	hydrolase activity, acting on carbon-nitrogen (but not peptide) bonds, in linear amides	1/692	10/9263	0.540138	0.953709	101205550	LOC101205550	1	0		1	101205550
MF	GO:0032296	double-stranded RNA-specific ribonuclease activity	1/692	10/9263	0.540138	0.953709	101205919	LOC101205919	1	0		1	101205919
MF	GO:0140103	catalytic activity, acting on a glycoprotein	1/692	10/9263	0.540138	0.953709	101222690	LOC101222690	1	0		1	101222690
MF	GO:0015298	solute:cation antiporter activity	2/692	24/9263	0.544544	0.953709	101213983/101208346	LOC101213983/LOC101208346	2	2	101213983/101208346	0
MF	GO:0015299	solute:proton antiporter activity	2/692	24/9263	0.544544	0.953709	101213983/101208346	LOC101213983/LOC101208346	2	2	101213983/101208346	0
MF	GO:0003700	DNA binding transcription factor activity	26/692	351/9263	0.54878	0.953709	101206453/101205762/101211247/101204430/101206916/101221542/101220325/101221306/101213234/101206564/116401613/105434407/101206889/101206047/101221681/101208584/101210782/101215311/101222736/101213537/101205848/101221703/101222720/101223208/101220518/101210308	LOC101206453/LOC101205762/LOC101211247/LOC101204430/LOC101206916/LOC101221542/LOC101220325/LOC101221306/LOC101213234/LOC101206564/LOC116401613/LOC105434407/LOC101206889/LOC101206047/WRKY22/LOC101208584/LOC101210782/LOC101215311/LOC101222736/WRKY32/LOC101205848/LOC101221703/LOC101222720/LOC101223208/LOC101220518/LOC101210308	26	16	101206453/101205762/101221542/101221306/101213234/116401613/101221681/101210782/101215311/101213537/101205848/101221703/101222720/101223208/101220518/101210308	10	101211247/101204430/101206916/101220325/101206564/105434407/101206889/101206047/101208584/101222736
MF	GO:0022857	transmembrane transporter activity	26/692	352/9263	0.55487	0.953709	101202870/101222356/101219304/101215102/116403192/101203764/101217163/101209987/101203205/101221620/101217853/101213983/101216286/101207199/101203402/101203724/101221552/101208346/101205555/101214695/101208396/101221154/101219163/101218141/101209937/101215746	LOC101202870/LOC101222356/LOC101219304/LOC101215102/LOC116403192/LOC101203764/LOC101217163/LOC101209987/LOC101203205/LOC101221620/LOC101217853/LOC101213983/LOC101216286/LOC101207199/LOC101203402/LOC101203724/LOC101221552/LOC101208346/LOC101205555/LOC101214695/LOC101208396/LOC101221154/LOC101219163/LOC101218141/LOC101209937/LOC101215746	26	12	101217163/101209987/101221620/101217853/101213983/101207199/101203724/101208346/101214695/101221154/101219163/101209937	14	101202870/101222356/101219304/101215102/116403192/101203764/101203205/101216286/101203402/101221552/101205555/101208396/101218141/101215746
MF	GO:0004540	ribonuclease activity	2/692	25/9263	0.567033	0.953709	101205919/101220274	LOC101205919/LOC101220274	2	1	101220274	1	101205919
MF	GO:0005543	phospholipid binding	2/692	25/9263	0.567033	0.953709	101222238/101219945	LOC101222238/LOC101219945	2	0		2	101222238/101219945
MF	GO:0016831	carboxy-lyase activity	2/692	25/9263	0.567033	0.953709	101208329/101216256	LOC101208329/PPC3	2	0		2	101208329/101216256
MF	GO:0060589	nucleoside-triphosphatase regulator activity	2/692	25/9263	0.567033	0.953709	101217929/101220266	LOC101217929/LOC101220266	2	0		2	101217929/101220266
MF	GO:0005342	organic acid transmembrane transporter activity	1/692	11/9263	0.574529	0.953709	101217853	LOC101217853	1	1	101217853	0
MF	GO:0015171	amino acid transmembrane transporter activity	1/692	11/9263	0.574529	0.953709	101217853	LOC101217853	1	1	101217853	0
MF	GO:0016891	endoribonuclease activity, producing 5'-phosphomonoesters	1/692	11/9263	0.574529	0.953709	101205919	LOC101205919	1	0		1	101205919
MF	GO:0016893	endonuclease activity, active with either ribo- or deoxyribonucleic acids and producing 5'-phosphomonoesters	1/692	11/9263	0.574529	0.953709	101205919	LOC101205919	1	0		1	101205919
MF	GO:0046943	carboxylic acid transmembrane transporter activity	1/692	11/9263	0.574529	0.953709	101217853	LOC101217853	1	1	101217853	0
MF	GO:0022804	active transmembrane transporter activity	9/692	123/9263	0.57593	0.953709	101219304/101215102/101203764/101213983/101207199/101203402/101208346/101214695/101221154	LOC101219304/LOC101215102/LOC101203764/LOC101213983/LOC101207199/LOC101203402/LOC101208346/LOC101214695/LOC101221154	9	5	101213983/101207199/101208346/101214695/101221154	4	101219304/101215102/101203764/101203402
MF	GO:0051536	iron-sulfur cluster binding	4/692	54/9263	0.581533	0.953709	101214065/101222003/101205803/101204210	LOC101214065/LOC101222003/LOC101205803/LOC101204210	4	0		4	101214065/101222003/101205803/101204210
MF	GO:0051540	metal cluster binding	4/692	54/9263	0.581533	0.953709	101214065/101222003/101205803/101204210	LOC101214065/LOC101222003/LOC101205803/LOC101204210	4	0		4	101214065/101222003/101205803/101204210
MF	GO:0004601	peroxidase activity	6/692	82/9263	0.581986	0.953709	101217543/101221151/101203032/101218397/101217567/101217781	LOC101217543/LOC101221151/LOC101203032/LOC101218397/LOC101217567/LOC101217781	6	0		6	101217543/101221151/101203032/101218397/101217567/101217781
MF	GO:0008236	serine-type peptidase activity	7/692	96/9263	0.583056	0.953709	101206746/116402232/101220830/101209256/101214825/101217410/101211004	LOC101206746/LOC116402232/LOC101220830/LOC101209256/LOC101214825/LOC101217410/LOC101211004	7	2	101220830/101209256	5	101206746/116402232/101214825/101217410/101211004
MF	GO:0017171	serine hydrolase activity	7/692	96/9263	0.583056	0.953709	101206746/116402232/101220830/101209256/101214825/101217410/101211004	LOC101206746/LOC116402232/LOC101220830/LOC101209256/LOC101214825/LOC101217410/LOC101211004	7	2	101220830/101209256	5	101206746/116402232/101214825/101217410/101211004
MF	GO:0005509	calcium ion binding	9/692	125/9263	0.595729	0.953709	101208369/101222238/101223029/novel.102/101219945/novel.133/101206440/101218270/101207567	LOC101208369/LOC101222238/LOC101223029/-/LOC101219945/-/LOC101206440/LOC101218270/LOC101207567	9	6	101208369/101223029/novel.102/novel.133/101206440/101218270	3	101222238/101219945/101207567
MF	GO:0008135	translation factor activity, RNA binding	3/692	41/9263	0.600329	0.953709	101219651/101213295/101214334	LOC101219651/LOC101213295/LOC101214334	3	2	101219651/101214334	1	101213295
MF	GO:0016684	oxidoreductase activity, acting on peroxide as acceptor	6/692	84/9263	0.605927	0.953709	101217543/101221151/101203032/101218397/101217567/101217781	LOC101217543/LOC101221151/LOC101203032/LOC101218397/LOC101217567/LOC101217781	6	0		6	101217543/101221151/101203032/101218397/101217567/101217781
MF	GO:0003746	translation elongation factor activity	1/692	12/9263	0.606352	0.953709	101213295	LOC101213295	1	0		1	101213295
MF	GO:0008514	organic anion transmembrane transporter activity	1/692	12/9263	0.606352	0.953709	101217853	LOC101217853	1	1	101217853	0
MF	GO:0016307	phosphatidylinositol phosphate kinase activity	1/692	12/9263	0.606352	0.953709	101219958	LOC101219958	1	0		1	101219958
MF	GO:0016763	transferase activity, transferring pentosyl groups	1/692	12/9263	0.606352	0.953709	101206917	LOC101206917	1	1	101206917	0
MF	GO:0051537	2 iron, 2 sulfur cluster binding	1/692	12/9263	0.606352	0.953709	101222003	LOC101222003	1	0		1	101222003
MF	GO:0030170	pyridoxal phosphate binding	4/692	56/9263	0.610764	0.953709	101217299/101208662/101219660/101208573	LOC101217299/LOC101208662/LOC101219660/LOC101208573	4	3	101217299/101208662/101208573	1	101219660
MF	GO:0070279	vitamin B6 binding	4/692	56/9263	0.610764	0.953709	101217299/101208662/101219660/101208573	LOC101217299/LOC101208662/LOC101219660/LOC101208573	4	3	101217299/101208662/101208573	1	101219660
MF	GO:0004650	polygalacturonase activity	2/692	28/9263	0.629613	0.953709	101207227/101217094	LOC101207227/LOC101217094	2	0		2	101207227/101217094
MF	GO:0004866	endopeptidase inhibitor activity	1/692	13/9263	0.635798	0.953709	101207401	LOC101207401	1	1	101207401	0
MF	GO:0030414	peptidase inhibitor activity	1/692	13/9263	0.635798	0.953709	101207401	LOC101207401	1	1	101207401	0
MF	GO:0042393	histone binding	1/692	13/9263	0.635798	0.953709	101211934	LOC101211934	1	1	101211934	0
MF	GO:0044877	protein-containing complex binding	1/692	13/9263	0.635798	0.953709	101213295	LOC101213295	1	0		1	101213295
MF	GO:0061134	peptidase regulator activity	1/692	13/9263	0.635798	0.953709	101207401	LOC101207401	1	1	101207401	0
MF	GO:0061135	endopeptidase regulator activity	1/692	13/9263	0.635798	0.953709	101207401	LOC101207401	1	1	101207401	0
MF	GO:0004497	monooxygenase activity	2/692	29/9263	0.648846	0.953709	101222003/101210582	LOC101222003/LOC101210582	2	0		2	101222003/101210582
MF	GO:0016836	hydro-lyase activity	2/692	29/9263	0.648846	0.953709	101213380/101215090	LOC101213380/LOC101215090	2	2	101213380/101215090	0
MF	GO:0016209	antioxidant activity	6/692	88/9263	0.651465	0.953709	101217543/101221151/101203032/101218397/101217567/101217781	LOC101217543/LOC101221151/LOC101203032/LOC101218397/LOC101217567/LOC101217781	6	0		6	101217543/101221151/101203032/101218397/101217567/101217781
MF	GO:0005085	guanyl-nucleotide exchange factor activity	1/692	14/9263	0.663044	0.953709	101212682	LOC101212682	1	0		1	101212682
MF	GO:0008138	protein tyrosine/serine/threonine phosphatase activity	1/692	14/9263	0.663044	0.953709	101220751	LOC101220751	1	1	101220751	0
MF	GO:0019843	rRNA binding	1/692	14/9263	0.663044	0.953709	101207012	LOC101207012	1	0		1	101207012
MF	GO:0004386	helicase activity	2/692	30/9263	0.667277	0.953709	101217839/101211021	LOC101217839/LOC101211021	2	0		2	101217839/101211021
MF	GO:0016866	intramolecular transferase activity	2/692	31/9263	0.684919	0.953709	101203320/101211896	LOC101203320/LOC101211896	2	1	101211896	1	101203320
MF	GO:0003682	chromatin binding	1/692	15/9263	0.688255	0.953709	101207925	LOC101207925	1	0		1	101207925
MF	GO:0015079	potassium ion transmembrane transporter activity	1/692	15/9263	0.688255	0.953709	101218141	LOC101218141	1	0		1	101218141
MF	GO:0140110	transcription regulator activity	26/692	376/9263	0.691146	0.953709	101206453/101205762/101211247/101204430/101206916/101221542/101220325/101221306/101213234/101206564/116401613/105434407/101206889/101206047/101221681/101208584/101210782/101215311/101222736/101213537/101205848/101221703/101222720/101223208/101220518/101210308	LOC101206453/LOC101205762/LOC101211247/LOC101204430/LOC101206916/LOC101221542/LOC101220325/LOC101221306/LOC101213234/LOC101206564/LOC116401613/LOC105434407/LOC101206889/LOC101206047/WRKY22/LOC101208584/LOC101210782/LOC101215311/LOC101222736/WRKY32/LOC101205848/LOC101221703/LOC101222720/LOC101223208/LOC101220518/LOC101210308	26	16	101206453/101205762/101221542/101221306/101213234/116401613/101221681/101210782/101215311/101213537/101205848/101221703/101222720/101223208/101220518/101210308	10	101211247/101204430/101206916/101220325/101206564/105434407/101206889/101206047/101208584/101222736
MF	GO:0016791	phosphatase activity	3/692	47/9263	0.692696	0.953709	101217360/101215456/101220751	LOC101217360/LOC101215456/LOC101220751	3	3	101217360/101215456/101220751	0
MF	GO:0046873	metal ion transmembrane transporter activity	3/692	48/9263	0.706415	0.953709	101221552/101218141/101209937	LOC101221552/LOC101218141/LOC101209937	3	1	101209937	2	101221552/101218141
MF	GO:0004721	phosphoprotein phosphatase activity	1/692	16/9263	0.711582	0.953709	101220751	LOC101220751	1	1	101220751	0
MF	GO:0005096	GTPase activator activity	1/692	16/9263	0.711582	0.953709	101217929	LOC101217929	1	0		1	101217929
MF	GO:0016597	amino acid binding	1/692	16/9263	0.711582	0.953709	101218703	LOC101218703	1	0		1	101218703
MF	GO:0019899	enzyme binding	2/692	33/9263	0.717897	0.953709	101212888/101212682	LOC101212888/LOC101212682	2	0		2	101212888/101212682
MF	GO:0019842	vitamin binding	4/692	65/9263	0.725799	0.953709	101217299/101208662/101219660/101208573	LOC101217299/LOC101208662/LOC101219660/LOC101208573	4	3	101217299/101208662/101208573	1	101219660
MF	GO:0008081	phosphoric diester hydrolase activity	1/692	17/9263	0.733166	0.953709	101209542	LOC101209542	1	0		1	101209542
MF	GO:0008375	acetylglucosaminyltransferase activity	2/692	34/9263	0.733269	0.953709	101210480/101222690	LOC101210480/LOC101222690	2	1	101210480	1	101222690
MF	GO:0016874	ligase activity	5/692	82/9263	0.743205	0.953709	101210547/101215982/101209617/101220233/101211723	LOC101210547/LOC101215982/LOC101209617/LOC101220233/LOC101211723	5	4	101210547/101215982/101209617/101220233	1	101211723
MF	GO:0042626	ATPase activity, coupled to transmembrane movement of substances	3/692	51/9263	0.744749	0.953709	101219304/101215102/101214695	LOC101219304/LOC101215102/LOC101214695	3	1	101214695	2	101219304/101215102
MF	GO:0043492	ATPase activity, coupled to movement of substances	3/692	51/9263	0.744749	0.953709	101219304/101215102/101214695	LOC101219304/LOC101215102/LOC101214695	3	1	101214695	2	101219304/101215102
MF	GO:0008171	O-methyltransferase activity	1/692	18/9263	0.753136	0.953709	101214916	LOC101214916	1	0		1	101214916
MF	GO:0010181	FMN binding	1/692	18/9263	0.753136	0.953709	101206931	LOC101206931	1	1	101206931	0
MF	GO:0031406	carboxylic acid binding	1/692	18/9263	0.753136	0.953709	101218703	LOC101218703	1	0		1	101218703
MF	GO:0043177	organic acid binding	1/692	18/9263	0.753136	0.953709	101218703	LOC101218703	1	0		1	101218703
MF	GO:0015318	inorganic molecular entity transmembrane transporter activity	12/692	188/9263	0.756203	0.953709	101202870/116403192/101209987/101203205/101217853/101213983/101221552/101208346/101205555/101219163/101218141/101209937	LOC101202870/LOC116403192/LOC101209987/LOC101203205/LOC101217853/LOC101213983/LOC101221552/LOC101208346/LOC101205555/LOC101219163/LOC101218141/LOC101209937	12	6	101209987/101217853/101213983/101208346/101219163/101209937	6	101202870/116403192/101203205/101221552/101205555/101218141
MF	GO:0043565	sequence-specific DNA binding	12/692	189/9263	0.762501	0.953709	101211247/101204430/116401613/105434407/101206047/101221681/101215311/101213537/101205848/101222720/101223208/101210308	LOC101211247/LOC101204430/LOC116401613/LOC105434407/LOC101206047/WRKY22/LOC101215311/WRKY32/LOC101205848/LOC101222720/LOC101223208/LOC101210308	12	8	116401613/101221681/101215311/101213537/101205848/101222720/101223208/101210308	4	101211247/101204430/105434407/101206047
MF	GO:0015399	primary active transmembrane transporter activity	3/692	53/9263	0.768015	0.953709	101219304/101215102/101214695	LOC101219304/LOC101215102/LOC101214695	3	1	101214695	2	101219304/101215102
MF	GO:0015405	P-P-bond-hydrolysis-driven transmembrane transporter activity	3/692	53/9263	0.768015	0.953709	101219304/101215102/101214695	LOC101219304/LOC101215102/LOC101214695	3	1	101214695	2	101219304/101215102
MF	GO:0004521	endoribonuclease activity	1/692	19/9263	0.771614	0.953709	101205919	LOC101205919	1	0		1	101205919
MF	GO:0008757	S-adenosylmethionine-dependent methyltransferase activity	1/692	19/9263	0.771614	0.953709	101219631	LOC101219631	1	1	101219631	0
MF	GO:0070011	peptidase activity, acting on L-amino acid peptides	14/692	220/9263	0.772494	0.953709	101215771/101206746/101215538/116402232/101210271/101220830/101209256/101206928/101222921/101214825/101217410/101221987/101204698/101211004	LOC101215771/LOC101206746/LOC101215538/LOC116402232/LOC101210271/LOC101220830/LOC101209256/LOC101206928/LOC101222921/LOC101214825/LOC101217410/LOC101221987/LOC101204698/LOC101211004	14	8	101215771/101215538/101210271/101220830/101209256/101206928/101222921/101221987	6	101206746/116402232/101214825/101217410/101204698/101211004
MF	GO:0016853	isomerase activity	6/692	101/9263	0.775576	0.953709	101207441/101215950/101218716/101203320/101211896/101206458	LOC101207441/LOC101215950/LOC101218716/LOC101203320/LOC101211896/LOC101206458	6	2	101207441/101211896	4	101215950/101218716/101203320/101206458
MF	GO:0051287	NAD binding	3/692	54/9263	0.778985	0.953709	116405070/116406426/116403315	LOC116405070/LOC116406426/LOC116403315	3	2	116405070/116403315	1	116406426
MF	GO:0042578	phosphoric ester hydrolase activity	4/692	71/9263	0.787166	0.953709	101217360/101209542/101215456/101220751	LOC101217360/LOC101209542/LOC101215456/LOC101220751	4	3	101217360/101215456/101220751	1	101209542
MF	GO:0015075	ion transmembrane transporter activity	13/692	208/9263	0.787693	0.953709	101202870/101222356/116403192/101209987/101203205/101217853/101213983/101221552/101208346/101205555/101219163/101218141/101209937	LOC101202870/LOC101222356/LOC116403192/LOC101209987/LOC101203205/LOC101217853/LOC101213983/LOC101221552/LOC101208346/LOC101205555/LOC101219163/LOC101218141/LOC101209937	13	6	101209987/101217853/101213983/101208346/101219163/101209937	7	101202870/101222356/116403192/101203205/101221552/101205555/101218141
MF	GO:0016830	carbon-carbon lyase activity	2/692	38/9263	0.78779	0.953709	101208329/101216256	LOC101208329/PPC3	2	0		2	101208329/101216256
MF	GO:0030695	GTPase regulator activity	1/692	20/9263	0.788711	0.953709	101217929	LOC101217929	1	0		1	101217929
MF	GO:0004252	serine-type endopeptidase activity	3/692	55/9263	0.789524	0.953709	101206746/101214825/101217410	LOC101206746/LOC101214825/LOC101217410	3	0		3	101206746/101214825/101217410
MF	GO:0003690	double-stranded DNA binding	3/692	57/9263	0.809351	0.953709	116403946/101206293/116403949	LOC116403946/LOC101206293/LOC116403949	3	0		3	116403946/101206293/116403949
MF	GO:0004842	ubiquitin-protein transferase activity	3/692	57/9263	0.809351	0.953709	101203877/101215873/101217665	LOC101203877/LOC101215873/LOC101217665	3	2	101215873/101217665	1	101203877
MF	GO:0019787	ubiquitin-like protein transferase activity	3/692	57/9263	0.809351	0.953709	101203877/101215873/101217665	LOC101203877/LOC101215873/LOC101217665	3	2	101215873/101217665	1	101203877
MF	GO:0008233	peptidase activity	14/692	228/9263	0.814732	0.953709	101215771/101206746/101215538/116402232/101210271/101220830/101209256/101206928/101222921/101214825/101217410/101221987/101204698/101211004	LOC101215771/LOC101206746/LOC101215538/LOC116402232/LOC101210271/LOC101220830/LOC101209256/LOC101206928/LOC101222921/LOC101214825/LOC101217410/LOC101221987/LOC101204698/LOC101211004	14	8	101215771/101215538/101210271/101220830/101209256/101206928/101222921/101221987	6	101206746/116402232/101214825/101217410/101204698/101211004
MF	GO:0051020	GTPase binding	1/692	22/9263	0.819166	0.953709	101212682	LOC101212682	1	0		1	101212682
MF	GO:0008168	methyltransferase activity	8/692	139/9263	0.824837	0.953709	101206343/101214916/101202849/101203129/101220267/101215920/101222636/101219631	LOC101206343/LOC101214916/ERAF16/LOC101203129/LOC101220267/LOC101215920/LOC101222636/LOC101219631	8	2	101206343/101219631	6	101214916/101202849/101203129/101220267/101215920/101222636
MF	GO:0016709	oxidoreductase activity, acting on paired donors, with incorporation or reduction of molecular oxygen, NAD(P)H as one donor, and incorporation of one atom of oxygen	1/692	23/9263	0.832707	0.953709	101210582	LOC101210582	1	0		1	101210582
MF	GO:0022836	gated channel activity	1/692	23/9263	0.832707	0.953709	101209987	LOC101209987	1	1	101209987	0
MF	GO:0022839	ion gated channel activity	1/692	23/9263	0.832707	0.953709	101209987	LOC101209987	1	1	101209987	0
MF	GO:0001882	nucleoside binding	9/692	156/9263	0.833529	0.953709	101219634/116403970/101212793/101209233/101206282/101208639/101217735/101221276/101211201	LOC101219634/LOC116403970/LOC101212793/LOC101209233/LOC101206282/LOC101208639/LOC101217735/LOC101221276/LOC101211201	9	7	101219634/116403970/101212793/101209233/101217735/101221276/101211201	2	101206282/101208639
MF	GO:0004175	endopeptidase activity	6/692	110/9263	0.8399	0.953709	101206746/101206928/101222921/101214825/101217410/101221987	LOC101206746/LOC101206928/LOC101222921/LOC101214825/LOC101217410/LOC101221987	6	3	101206928/101222921/101221987	3	101206746/101214825/101217410
MF	GO:0003779	actin binding	1/692	24/9263	0.845236	0.953709	101216210	LOC101216210	1	0		1	101216210
MF	GO:0019783	ubiquitin-like protein-specific protease activity	1/692	24/9263	0.845236	0.953709	101204698	LOC101204698	1	0		1	101204698
MF	GO:0036459	thiol-dependent ubiquitinyl hydrolase activity	1/692	24/9263	0.845236	0.953709	101204698	LOC101204698	1	0		1	101204698
MF	GO:0101005	ubiquitinyl hydrolase activity	1/692	24/9263	0.845236	0.953709	101204698	LOC101204698	1	0		1	101204698
MF	GO:0008289	lipid binding	3/692	62/9263	0.85211	0.953709	101222238/101223175/101219945	LOC101222238/LOC101223175/LOC101219945	3	1	101223175	2	101222238/101219945
MF	GO:0003755	peptidyl-prolyl cis-trans isomerase activity	1/692	25/9263	0.856828	0.953709	101206458	LOC101206458	1	0		1	101206458
MF	GO:0005516	calmodulin binding	1/692	25/9263	0.856828	0.953709	105436210	LOC105436210	1	0		1	105436210
MF	GO:0016859	cis-trans isomerase activity	1/692	25/9263	0.856828	0.953709	101206458	LOC101206458	1	0		1	101206458
MF	GO:0022890	inorganic cation transmembrane transporter activity	6/692	113/9263	0.857716	0.953709	101213983/101221552/101208346/101205555/101218141/101209937	LOC101213983/LOC101221552/LOC101208346/LOC101205555/LOC101218141/LOC101209937	6	3	101213983/101208346/101209937	3	101221552/101205555/101218141
MF	GO:0016741	transferase activity, transferring one-carbon groups	8/692	145/9263	0.857756	0.953709	101206343/101214916/101202849/101203129/101220267/101215920/101222636/101219631	LOC101206343/LOC101214916/ERAF16/LOC101203129/LOC101220267/LOC101215920/LOC101222636/LOC101219631	8	2	101206343/101219631	6	101214916/101202849/101203129/101220267/101215920/101222636
MF	GO:0015077	monovalent inorganic cation transmembrane transporter activity	4/692	80/9263	0.858093	0.953709	101213983/101208346/101205555/101218141	LOC101213983/LOC101208346/LOC101205555/LOC101218141	4	2	101213983/101208346	2	101205555/101218141
MF	GO:0050660	flavin adenine dinucleotide binding	5/692	97/9263	0.859864	0.953709	101205454/101219817/101210582/101210614/101209166	LOC101205454/LOC101219817/LOC101210582/LOC101210614/LOC101209166	5	1	101210614	4	101205454/101219817/101210582/101209166
MF	GO:0016810	hydrolase activity, acting on carbon-nitrogen (but not peptide) bonds	1/692	26/9263	0.867553	0.953709	101205550	LOC101205550	1	0		1	101205550
MF	GO:0015078	proton transmembrane transporter activity	3/692	65/9263	0.873544	0.953709	101213983/101208346/101205555	LOC101213983/LOC101208346/LOC101205555	3	2	101213983/101208346	1	101205555
MF	GO:0008324	cation transmembrane transporter activity	7/692	133/9263	0.877277	0.953709	101222356/101213983/101221552/101208346/101205555/101218141/101209937	LOC101222356/LOC101213983/LOC101221552/LOC101208346/LOC101205555/LOC101218141/LOC101209937	7	3	101213983/101208346/101209937	4	101222356/101221552/101205555/101218141
MF	GO:0004519	endonuclease activity	1/692	27/9263	0.877475	0.953709	101205919	LOC101205919	1	0		1	101205919
MF	GO:0016879	ligase activity, forming carbon-nitrogen bonds	1/692	27/9263	0.877475	0.953709	101215982	LOC101215982	1	1	101215982	0
MF	GO:0008234	cysteine-type peptidase activity	2/692	48/9263	0.883304	0.953709	101206928/101204698	LOC101206928/LOC101204698	2	1	101206928	1	101204698
MF	GO:0004222	metalloendopeptidase activity	1/692	29/9263	0.895148	0.953709	101222921	LOC101222921	1	1	101222921	0
MF	GO:0001883	purine nucleoside binding	8/692	155/9263	0.901396	0.953709	101219634/116403970/101212793/101209233/101206282/101208639/101217735/101221276	LOC101219634/LOC116403970/LOC101212793/LOC101209233/LOC101206282/LOC101208639/LOC101217735/LOC101221276	8	6	101219634/116403970/101212793/101209233/101217735/101221276	2	101206282/101208639
MF	GO:0005525	GTP binding	8/692	155/9263	0.901396	0.953709	101219634/116403970/101212793/101209233/101206282/101208639/101217735/101221276	LOC101219634/LOC116403970/LOC101212793/LOC101209233/LOC101206282/LOC101208639/LOC101217735/LOC101221276	8	6	101219634/116403970/101212793/101209233/101217735/101221276	2	101206282/101208639
MF	GO:0032549	ribonucleoside binding	8/692	155/9263	0.901396	0.953709	101219634/116403970/101212793/101209233/101206282/101208639/101217735/101221276	LOC101219634/LOC116403970/LOC101212793/LOC101209233/LOC101206282/LOC101208639/LOC101217735/LOC101221276	8	6	101219634/116403970/101212793/101209233/101217735/101221276	2	101206282/101208639
MF	GO:0032550	purine ribonucleoside binding	8/692	155/9263	0.901396	0.953709	101219634/116403970/101212793/101209233/101206282/101208639/101217735/101221276	LOC101219634/LOC116403970/LOC101212793/LOC101209233/LOC101206282/LOC101208639/LOC101217735/LOC101221276	8	6	101219634/116403970/101212793/101209233/101217735/101221276	2	101206282/101208639
MF	GO:0032561	guanyl ribonucleotide binding	8/692	155/9263	0.901396	0.953709	101219634/116403970/101212793/101209233/101206282/101208639/101217735/101221276	LOC101219634/LOC116403970/LOC101212793/LOC101209233/LOC101206282/LOC101208639/LOC101217735/LOC101221276	8	6	101219634/116403970/101212793/101209233/101217735/101221276	2	101206282/101208639
MF	GO:0000988	transcription factor activity, protein binding	1/692	31/9263	0.910276	0.955708	101208584	LOC101208584	1	0		1	101208584
MF	GO:0003723	RNA binding	13/692	238/9263	0.911469	0.955708	101206291/101219651/101213295/101205919/101214970/101203320/101211896/101210000/101207012/101214334/101217340/101216254/101217808	LOC101206291/LOC101219651/LOC101213295/LOC101205919/LOC101214970/LOC101203320/LOC101211896/LOC101210000/LOC101207012/LOC101214334/LOC101217340/LOC101216254/LOC101217808	13	8	101206291/101219651/101214970/101211896/101214334/101217340/101216254/101217808	5	101213295/101205919/101203320/101210000/101207012
MF	GO:0019001	guanyl nucleotide binding	8/692	159/9263	0.915383	0.955708	101219634/116403970/101212793/101209233/101206282/101208639/101217735/101221276	LOC101219634/LOC116403970/LOC101212793/LOC101209233/LOC101206282/LOC101208639/LOC101217735/LOC101221276	8	6	101219634/116403970/101212793/101209233/101217735/101221276	2	101206282/101208639
MF	GO:0050662	coenzyme binding	15/692	275/9263	0.925719	0.962261	101217299/101208634/101206931/101208662/116405070/101217921/101205454/101219817/101219660/101208573/101210582/116406426/101210614/116403315/101209166	LOC101217299/LOC101208634/LOC101206931/LOC101208662/LOC116405070/LOC101217921/LOC101205454/LOC101219817/LOC101219660/LOC101208573/LOC101210582/LOC116406426/LOC101210614/LOC116403315/LOC101209166	15	7	101217299/101206931/101208662/116405070/101208573/101210614/116403315	8	101208634/101217921/101205454/101219817/101219660/101210582/116406426/101209166
MF	GO:0008237	metallopeptidase activity	1/692	37/9263	0.943788	0.976759	101222921	LOC101222921	1	1	101222921	0
MF	GO:0005198	structural molecule activity	11/692	226/9263	0.956219	0.982525	101203845/101219899/101213217/101212337/3429308/101210000/101207012/101204269/101220973/101215592/101206444	LOC101203845/LOC101219899/LOC101213217/LOC101212337/rps14/LOC101210000/LOC101207012/LOC101204269/LOC101220973/LOC101215592/LOC101206444	11	2	3429308/101215592	9	101203845/101219899/101213217/101212337/101210000/101207012/101204269/101220973/101206444
MF	GO:0043531	ADP binding	1/692	44/9263	0.967437	0.982525	101219868	LOC101219868	1	1	101219868	0
MF	GO:0005216	ion channel activity	1/692	47/9263	0.974234	0.982525	101209987	LOC101209987	1	1	101209987	0
MF	GO:0015267	channel activity	1/692	47/9263	0.974234	0.982525	101209987	LOC101209987	1	1	101209987	0
MF	GO:0022803	passive transmembrane transporter activity	1/692	47/9263	0.974234	0.982525	101209987	LOC101209987	1	1	101209987	0
MF	GO:0022838	substrate-specific channel activity	1/692	47/9263	0.974234	0.982525	101209987	LOC101209987	1	1	101209987	0
MF	GO:0003735	structural constituent of ribosome	9/692	210/9263	0.979002	0.982868	101203845/101219899/3429308/101210000/101207012/101204269/101220973/101215592/101206444	LOC101203845/LOC101219899/rps14/LOC101210000/LOC101207012/LOC101204269/LOC101220973/LOC101215592/LOC101206444	9	2	3429308/101215592	7	101203845/101219899/101210000/101207012/101204269/101220973/101206444
MF	GO:0030246	carbohydrate binding	3/692	100/9263	0.982868	0.982868	101203271/101218232/101203424	LOC101203271/LOC101218232/LOC101203424	3	1	101218232	2	101203271/101203424
