# Supplementary material for: Identification of Key Genes during Ethylene-Induced Adventitious Root Development in Cucumber (Cucumis sativus L.)
Source: Int J Mol Sci. 2022 Oct 26;23(21):12981. doi: 10.3390/ijms232112981 (PMC9658848; doi:10.3390/ijms232112981)
Supplement: Supplementary file 1 [file ijms-23-12981-s001.zip › ijms-1968823-supplementary/Supplementary Table S4.xlsx]

## Sheet: Sheet1
Supplementary Table S4 KEGG pathway analysis of DEGs
	KEGGID	Description	GeneRatio	BgRatio	pvalue	padj	geneID	geneName	keggID	Count	Up	Up_Gene_id	Down	Down_Gene_id
1	csv00591	Linoleic acid metabolism	6/305	22/3927	0.00536507	0.343866	101220288/116402014/101206327/105434554/101216318/101209041	LOC101220288/LOC116402014/LOC101206327/LOX2/LOC101216318/LOC101209041	csv:101220288/csv:101207406/csv:101206327/csv:105434554/csv:101216318/csv:101209041	6	4	101220288/116402014/101206327/105434554	2	101216318/101209041
2	csv00500	Starch and sucrose metabolism	17/305	115/3927	0.00682846	0.343866	101203271/101204921/101221739/101221562/101221022/101211461/101222401/101222005/101211097/101216058/101215687/101209348/101212172/101213455/101214838/101208605/101208904	LOC101203271/LOC101204921/LOC101221739/LOC101221562/LOC101221022/LOC101211461/LOC101222401/LOC101222005/LOC101211097/LOC101216058/LOC101215687/LOC101209348/LOC101212172/LOC101213455/LOC101214838/LOC101208605/LOC101208904	csv:101203271/csv:101204921/csv:101221739/csv:101221562/csv:101221022/csv:101211461/csv:101222401/csv:101222005/csv:101211097/csv:101216058/csv:101215687/csv:101209348/csv:101212172/csv:101213455/csv:101214838/csv:101208605/csv:101208904	17	2	101222005/101215687	15	101203271/101204921/101221739/101221562/101221022/101211461/101222401/101211097/101216058/101209348/101212172/101213455/101214838/101208605/101208904
3	csv04075	Plant hormone signal transduction	26/305	208/3927	0.00937816	0.343866	101206247/101208823/101217842/101216386/101220325/101206564/116401613/101210262/101207154/101205786/101213450/101209540/101223028/101218948/101204882/101206566/101205750/101209777/101222720/101217643/101209970/101205993/101214088/101212037/101210308/101215306	LOC101206247/LOC101208823/XTH3/LOC101216386/LOC101220325/LOC101206564/LOC116401613/LOC101210262/LOC101207154/CS-ERS/LOC101213450/LOC101209540/LOC101223028/LOC101218948/LOC101204882/CS-AUX1/LOC101205750/LOC101209777/LOC101222720/LOC101217643/LOC101209970/LOC101205993/LOC101214088/LOC101212037/LOC101210308/LOC101215306	csv:101206247/csv:101208823/csv:101217842/csv:101216389/csv:101220325/csv:101206564/csv:101208419/csv:101210262/csv:101207154/csv:101205786/csv:101213450/csv:101209540/csv:101223028/csv:101218948/csv:101204882/csv:101206566/csv:101205750/csv:101209777/csv:101222720/csv:101217643/csv:101209970/csv:101205993/csv:101214088/csv:101212037/csv:101210308/csv:101215306	26	13	101208823/101217842/101216386/116401613/101210262/101209540/101204882/101222720/101209970/101205993/101214088/101212037/101210308	13	101206247/101220325/101206564/101207154/101205786/101213450/101223028/101218948/101206566/101205750/101209777/101217643/101215306
4	csv00073	Cutin, suberine and wax biosynthesis	6/305	27/3927	0.0153168	0.350721	101206763/101203441/101221526/101214516/101205454/101216733	LOC101206763/LOC101203441/LOC101221526/LOC101214516/LOC101205454/LOC101216733	csv:101206763/csv:101203441/csv:101221526/csv:101214516/csv:101205454/csv:101216733	6	0		6	101206763/101203441/101221526/101214516/101205454/101216733
5	csv00071	Fatty acid degradation	8/305	44/3927	0.018162	0.350721	101207461/101211996/101214516/101212158/101217710/101219569/101210295/101212707	LOC101207461/LOC101211996/LOC101214516/LOC101212158/LOC101217710/LOC101219569/LOC101210295/LOC101212707	csv:101207461/csv:101211996/csv:101214516/csv:101212158/csv:101217710/csv:101219569/csv:101210295/csv:101212707	8	6	101207461/101212158/101217710/101219569/101210295/101212707	2	101211996/101214516
6	csv00950	Isoquinoline alkaloid biosynthesis	4/305	14/3927	0.0191302	0.350721	101213059/101217299/101212818/101210998	LOC101213059/LOC101217299/LOC101212818/LOC101210998	csv:101213059/csv:101217299/csv:101212818/csv:101210998	4	4	101213059/101217299/101212818/101210998	0
7	csv00360	Phenylalanine metabolism	7/305	38/3927	0.0247489	0.388911	101213059/101217299/101212818/101218856/101210998/101204792/101214819	LOC101213059/LOC101217299/LOC101212818/LOC101218856/LOC101210998/LOC101204792/LOC101214819	csv:101213059/csv:101217299/csv:101212818/csv:101218617/csv:101210998/csv:101204792/csv:101214819	7	5	101213059/101217299/101212818/101210998/101214819	2	101218856/101204792
8	csv00909	Sesquiterpenoid and triterpenoid biosynthesis	4/305	16/3927	0.0307575	0.394107	101215070/101217112/101210582/101219443	LOC101215070/LOC101217112/LOC101210582/LOC101219443	csv:101215070/csv:101217112/csv:101210582/csv:101219443	4	2	101215070/101219443	2	101217112/101210582
9	csv00040	Pentose and glucuronate interconversions	10/305	67/3927	0.0322451	0.394107	101205557/101209736/101220821/101208076/101218188/101217580/101217414/101217635/101212388/101203012	LOC101205557/LOC101209736/LOC101220821/LOC101208076/LOC101218188/LOC101217580/LOC101217414/LOC101217635/LOC101212388/LOC101203012	csv:101205557/csv:101209736/csv:101220821/csv:101208076/csv:101218188/csv:101217580/csv:101217414/csv:101217635/csv:101212388/csv:101203012	10	2	101220821/101212388	8	101205557/101209736/101208076/101218188/101217580/101217414/101217635/101203012
10	csv00196	Photosynthesis - antenna proteins	4/305	18/3927	0.0457649	0.503414	101212963/101203342/101222687/101211276	LOC101212963/LOC101203342/LOC101222687/LOC101211276	csv:101212963/csv:101203342/csv:101222687/csv:101211276	4	0		4	101212963/101203342/101222687/101211276
11	csv00960	Tropane, piperidine and pyridine alkaloid biosynthesis	4/305	19/3927	0.0545494	0.545494	101213059/101217299/101212818/101210998	LOC101213059/LOC101217299/LOC101212818/LOC101210998	csv:101213059/csv:101217299/csv:101212818/csv:101210998	4	4	101213059/101217299/101212818/101210998	0
12	csv00592	alpha-Linolenic acid metabolism	7/305	47/3927	0.0681935	0.554195	101220288/101216318/101209041/101217710/101221732/101210295/101211324	LOC101220288/LOC101216318/LOC101209041/LOC101217710/AOS/LOC101210295/HPL	csv:101220288/csv:101216318/csv:101209041/csv:101217710/csv:101221732/csv:101210295/csv:101211324	7	4	101220288/101217710/101210295/101211324	3	101216318/101209041/101221732
13	csv01212	Fatty acid metabolism	8/305	57/3927	0.0710154	0.554195	101207461/101210955/101212158/101217710/101221009/101212007/101210295/101212707	LOC101207461/LOC101210955/LOC101212158/LOC101217710/LOC101221009/LOC101212007/LOC101210295/LOC101212707	csv:101207461/csv:101210955/csv:101212158/csv:101217710/csv:101221009/csv:101212007/csv:101210295/csv:101212707	8	6	101207461/101212158/101217710/101221009/101210295/101212707	2	101210955/101212007
14	csv00750	Vitamin B6 metabolism	3/305	13/3927	0.074089	0.554195	101217360/101202934/101218000	LOC101217360/LOC101202934/LOC101218000	csv:101217360/csv:101202934/csv:101218000	3	2	101217360/101218000	1	101202934
15	csv00230	Purine metabolism	10/305	79/3927	0.0829376	0.554195	101207870/101203595/101220786/101218731/101206620/101216714/101218678/101214103/101206974/101203230	LOC101207870/LOC101203595/LOC101220786/LOC101218731/LOC101206620/LOC101216714/LOC101218678/LOC101214103/LOC101206974/LOC101203230	csv:101207870/csv:101203595/csv:101220786/csv:101218731/csv:101206620/csv:101216714/csv:101218678/csv:101214103/csv:101206974/csv:101203230	10	3	101207870/101206974/101203230	7	101203595/101220786/101218731/101206620/101216714/101218678/101214103
16	csv00620	Pyruvate metabolism	9/305	69/3927	0.0837136	0.554195	101208329/101220786/101204247/101206620/101220730/101219569/101212707/101214523/101215151	LOC101208329/LOC101220786/LOC101204247/LOC101206620/LOC101220730/LOC101219569/LOC101212707/LOC101214523/LOC101215151	csv:101208329/csv:101220786/csv:101204247/csv:101206620/csv:101220730/csv:101219569/csv:101212707/csv:101214523/csv:101215151	9	3	101219569/101212707/101214523	6	101208329/101220786/101204247/101206620/101220730/101215151
17	csv03030	DNA replication	6/305	40/3927	0.0856483	0.554195	101210889/101219981/101217274/101211850/101208568/101211201	LOC101210889/LOC101219981/LOC101217274/LOC101211850/LOC101208568/LOC101211201	csv:101210889/csv:101219981/csv:101217274/csv:101211850/csv:101208568/csv:101211201	6	2	101219981/101211201	4	101210889/101217274/101211850/101208568
18	csv04136	Autophagy - other	5/305	32/3927	0.0977672	0.582117	101221089/101215846/101205863/101214589/101205954	LOC101221089/LOC101215846/LOC101205863/LOC101214589/LOC101205954	csv:101221089/csv:101215846/csv:101205863/csv:101214589/csv:101205954	5	5	101221089/101215846/101205863/101214589/101205954	0
19	csv00250	Alanine, aspartate and glutamate metabolism	7/305	52/3927	0.104795	0.582117	101218064/101217299/101208662/101219660/101213711/101215982/101205815	LOC101218064/LOC101217299/LOC101208662/LOC101219660/LOC101213711/LOC101215982/LOC101205815	csv:101218064/csv:101217299/csv:101208662/csv:101219660/csv:101213711/csv:101215982/csv:101205815	7	4	101218064/101217299/101208662/101215982	3	101219660/101213711/101205815
20	csv00350	Tyrosine metabolism	5/305	34/3927	0.119369	0.582117	101213059/101217299/101211996/101212818/101210998	LOC101213059/LOC101217299/LOC101211996/LOC101212818/LOC101210998	csv:101213059/csv:101217299/csv:101211996/csv:101212818/csv:101210998	5	4	101213059/101217299/101212818/101210998	1	101211996
21	csv00260	Glycine, serine and threonine metabolism	8/305	64/3927	0.119968	0.582117	101213059/101202934/101205680/101208662/101212818/101219817/101215910/101210998	LOC101213059/LOC101202934/LOC101205680/LOC101208662/LOC101212818/LOC101219817/LOC101215910/LOC101210998	csv:101213059/csv:101202934/csv:101205680/csv:101208662/csv:101212818/csv:101219817/csv:101215910/csv:101210998	8	5	101213059/101205680/101208662/101212818/101210998	3	101202934/101219817/101215910
22	csv00511	Other glycan degradation	3/305	16/3927	0.122397	0.582117	101204709/101211792/101203587	LOC101204709/LOC101211792/LOC101203587	csv:101204709/csv:101211792/csv:101203587	3	1	101204709	2	101211792/101203587
23	csv00520	Amino sugar and nucleotide sugar metabolism	12/305	108/3927	0.13006	0.582117	101208634/101222731/101221562/101217921/101206067/101216058/101209596/101203797/101211792/101211496/101208605/101208904	LOC101208634/LOC101222731/LOC101221562/LOC101217921/LOC101206067/LOC101216058/LOC101209596/LOC101203797/LOC101211792/LOC101211496/LOC101208605/LOC101208904	csv:101208634/csv:101222731/csv:101221562/csv:101217921/csv:101206067/csv:101216058/csv:101209596/csv:101203797/csv:101211792/csv:101211496/csv:101208605/csv:101208904	12	2	101222731/101211496	10	101208634/101221562/101217921/101206067/101216058/101209596/101203797/101211792/101208605/101208904
24	csv00561	Glycerolipid metabolism	8/305	66/3927	0.1366	0.582117	101210503/101211924/101220288/101208634/101219670/101219569/101208763/101221758	LOC101210503/LOC101211924/LOC101220288/LOC101208634/LOC101219670/LOC101219569/LOC101208763/LOC101221758	csv:101210503/csv:101211924/csv:101220288/csv:101208634/csv:101219670/csv:101219569/csv:101208763/csv:101221758	8	5	101211924/101220288/101219670/101219569/101208763	3	101210503/101208634/101221758
25	csv00450	Selenocompound metabolism	3/305	17/3927	0.140518	0.582117	101203129/101222636/101211038	LOC101203129/LOC101222636/LOC101211038	csv:101203129/csv:101222636/csv:101211038	3	0		3	101203129/101222636/101211038
26	csv04016	MAPK signaling pathway - plant	13/305	121/3927	0.142844	0.582117	101205351/101208823/101222731/101216386/101220325/101218801/101206564/101210262/101207154/101205786/101209540/101204882/101214088	LOC101205351/LOC101208823/LOC101222731/LOC101216386/LOC101220325/HMA5.2/LOC101206564/LOC101210262/LOC101207154/CS-ERS/LOC101209540/LOC101204882/LOC101214088	csv:101205351/csv:101208823/csv:101222731/csv:101216389/csv:101220325/csv:101218801/csv:101206564/csv:101210262/csv:101207154/csv:101205786/csv:101209540/csv:101204882/csv:101214088	13	8	101208823/101222731/101216386/101218801/101210262/101209540/101204882/101214088	5	101205351/101220325/101206564/101207154/101205786
27	csv00051	Fructose and mannose metabolism	6/305	46/3927	0.142883	0.582117	101215219/101221789/101216058/101222408/101202739/101211496	LOC101215219/LOC101221789/LOC101216058/LOC101222408/LOC101202739/LOC101211496	csv:101215219/csv:101221789/csv:101216058/csv:101222408/csv:101202739/csv:101211496	6	1	101211496	5	101215219/101221789/101216058/101222408/101202739
28	csv00010	Glycolysis / Gluconeogenesis	12/305	111/3927	0.150099	0.589677	101215219/101211996/101220786/101204247/101206620/101220730/101216058/101219569/101202739/101219631/101215513/101215151	LOC101215219/LOC101211996/LOC101220786/LOC101204247/LOC101206620/LOC101220730/LOC101216058/LOC101219569/LOC101202739/LOC101219631/LOC101215513/LOC101215151	csv:101215219/csv:101211996/csv:101220786/csv:101204247/csv:101206620/csv:101220730/csv:101216058/csv:101219569/csv:101202739/csv:101219631/csv:101215513/csv:101215151	12	2	101219569/101219631	10	101215219/101211996/101220786/101204247/101206620/101220730/101216058/101202739/101215513/101215151
29	csv00380	Tryptophan metabolism	5/305	38/3927	0.168483	0.639073	101206363/101219569/101204792/101214819/101212707	LOC101206363/LOC101219569/LOC101204792/LOC101214819/LOC101212707	csv:101206363/csv:101219569/csv:101204792/csv:101214819/csv:101212707	5	3	101219569/101214819/101212707	2	101206363/101204792
30	csv00941	Flavonoid biosynthesis	3/305	19/3927	0.179141	0.656851	101218716/101207160/101207100	LOC101218716/LOC101207160/LOC101207100	csv:101218716/csv:101207160/csv:101207100	3	1	101207100	2	101218716/101207160
31	csv00410	beta-Alanine metabolism	5/305	40/3927	0.19559	0.694029	101213059/101202899/101212818/101210998/101219569	LOC101213059/LOC101202899/LOC101212818/LOC101210998/LOC101219569	csv:101213059/csv:101202899/csv:101212818/csv:101210998/csv:101219569	5	5	101213059/101202899/101212818/101210998/101219569	0
32	csv00514	Other types of O-glycan biosynthesis	2/305	11/3927	0.208323	0.698937	101202868/101207236	LOC101202868/LOC101207236	csv:101202868/csv:101207236	2	0		2	101202868/101207236
33	csv00020	Citrate cycle (TCA cycle)	5/305	41/3927	0.209681	0.698937	101209539/101202770/101204247/101220730/101215151	LOC101209539/LOC101202770/LOC101204247/LOC101220730/LOC101215151	csv:101209539/csv:101202770/csv:101204247/csv:101220730/csv:101215151	5	0		5	101209539/101202770/101204247/101220730/101215151
34	csv00600	Sphingolipid metabolism	3/305	21/3927	0.220228	0.712504	101211924/101204709/101205550	LOC101211924/LOC101204709/LOC101205550	csv:101211924/csv:101204709/csv:101205550	3	2	101211924/101204709	1	101205550
35	csv04141	Protein processing in endoplasmic reticulum	15/305	157/3927	0.235101	0.737733	101215599/101207890/101207505/101221822/101203607/101204666/101210925/101209193/101210094/101208967/101207859/101221276/101207000/101209121/101205889	LOC101215599/LOC101207890/LOC101207505/LOC101221822/LOC101203607/LOC101204666/LOC101210925/LOC101209193/LOC101210094/LOC101208967/LOC101207859/LOC101221276/LOC101207000/LOC101209121/LOC101205889	csv:101215599/csv:101207890/csv:101207505/csv:101221822/csv:101203607/csv:101204666/csv:101210925/csv:101209193/csv:101210094/csv:101208967/csv:101207859/csv:101221276/csv:101207000/csv:101209121/csv:101205889	15	6	101209193/101208967/101221276/101207000/101209121/101205889	9	101215599/101207890/101207505/101221822/101203607/101204666/101210925/101210094/101207859
36	csv02010	ABC transporters	3/305	22/3927	0.24144	0.737733	101219304/101215102/101214695	LOC101219304/LOC101215102/LOC101214695	csv:101219304/csv:101215102/csv:101214695	3	1	101214695	2	101219304/101215102
37	csv01230	Biosynthesis of amino acids	18/305	196/3927	0.259565	0.761223	101207177/101216623/101217299/101202934/101205680/101220786/101202770/101213380/101203129/101206620/101215910/101211790/101202739/101222636/101213711/101219631/101215982/101215513	LOC101207177/LOC101216623/LOC101217299/LOC101202934/LOC101205680/LOC101220786/LOC101202770/LOC101213380/LOC101203129/LOC101206620/LOC101215910/LOC101211790/LOC101202739/LOC101222636/LOC101213711/LOC101219631/LOC101215982/LOC101215513	csv:101207177/csv:101216623/csv:101217299/csv:101202934/csv:101205680/csv:101220786/csv:101202770/csv:101213380/csv:101203129/csv:101206620/csv:101215910/csv:101211790/csv:101202739/csv:101222636/csv:101213711/csv:101219631/csv:101215982/csv:101215513	18	6	101217299/101205680/101213380/101211790/101219631/101215982	12	101207177/101216623/101202934/101220786/101202770/101203129/101206620/101215910/101202739/101222636/101213711/101215513
38	csv00565	Ether lipid metabolism	3/305	23/3927	0.262968	0.761223	101220522/101220288/101207886	LOC101220522/LOC101220288/LOC101207886	csv:101220522/csv:101220288/csv:101207886	3	2	101220288/101207886	1	101220522
39	csv00052	Galactose metabolism	5/305	46/3927	0.284284	0.766546	101211924/101203037/101216058/101202739/101208382	LOC101211924/AGA3/LOC101216058/LOC101202739/GOLS	csv:101211924/csv:101203037/csv:101216058/csv:101202739/csv:101208382	5	1	101211924	4	101203037/101216058/101202739/101208382
40	csv00061	Fatty acid biosynthesis	4/305	35/3927	0.28689	0.766546	101207461/101210955/101212158/101221009	LOC101207461/LOC101210955/LOC101212158/LOC101221009	csv:101207461/csv:101210955/csv:101212158/csv:101221009	4	3	101207461/101212158/101221009	1	101210955
41	csv04933	AGE-RAGE signaling pathway in diabetic complications	2/305	14/3927	0.297477	0.766546	101209542/101208639	LOC101209542/LOC101208639	csv:101209542/csv:101208639	2	0		2	101209542/101208639
42	csv03440	Homologous recombination	5/305	47/3927	0.299816	0.766546	101219784/101219981/101217839/101222995/101211021	LOC101219784/LOC101219981/LOC101217839/LOC101222995/LOC101211021	csv:101219784/csv:101219981/csv:101217839/csv:101222995/csv:101211021	5	1	101219981	4	101219784/101217839/101222995/101211021
43	csv01200	Carbon metabolism	19/305	214/3927	0.302115	0.766546	101216623/101217299/101202934/101211996/101205680/101208329/101220786/101202770/101204247/101206620/101215910/101220730/101216058/101202739/101219631/101212707/101214523/101215513/101215151	LOC101216623/LOC101217299/LOC101202934/LOC101211996/LOC101205680/LOC101208329/LOC101220786/LOC101202770/LOC101204247/LOC101206620/LOC101215910/LOC101220730/LOC101216058/LOC101202739/LOC101219631/LOC101212707/LOC101214523/LOC101215513/LOC101215151	csv:101216623/csv:101217299/csv:101202934/csv:101211996/csv:101205680/csv:101208329/csv:101220786/csv:101202770/csv:101204247/csv:101206620/csv:101215910/csv:101220730/csv:101216058/csv:101202739/csv:101219631/csv:101212707/csv:101214523/csv:101215513/csv:101215151	19	5	101217299/101205680/101219631/101212707/101214523	14	101216623/101202934/101211996/101208329/101220786/101202770/101204247/101206620/101215910/101220730/101216058/101202739/101215513/101215151
44	csv00062	Fatty acid elongation	3/305	25/3927	0.306618	0.766546	101217359/101218433/101212007	LOC101217359/LOC101218433/LOC101212007	csv:101217359/csv:101218433/csv:101212007	3	0		3	101217359/101218433/101212007
45	csv00290	Valine, leucine and isoleucine biosynthesis	2/305	15/3927	0.327056	0.799471	101205680/101211790	LOC101205680/LOC101211790	csv:101205680/csv:101211790	2	2	101205680/101211790	0
46	csv04120	Ubiquitin mediated proteolysis	8/305	87/3927	0.363007	0.86806	101214341/105434867/101208947/101213539/101208967/101212453/101209121/101220229	LOC101214341/LOC105434867/LOC101208947/LOC101213539/LOC101208967/UBC13/LOC101209121/LOC101220229	csv:101214341/csv:105434867/csv:101208947/csv:101213539/csv:101208967/csv:101212453/csv:101209121/csv:101220229	8	4	105434867/101208967/101212453/101209121	4	101214341/101208947/101213539/101220229
47	csv00270	Cysteine and methionine metabolism	8/305	88/3927	0.375146	0.878002	101209525/101216623/101217299/101202934/101208662/101203129/101222636/101207925	CS-ACO1/LOC101216623/LOC101217299/LOC101202934/LOC101208662/LOC101203129/LOC101222636/LOC101207925	csv:101209525/csv:101216623/csv:101217299/csv:101202934/csv:101208662/csv:101203129/csv:101222636/csv:101207925	8	2	101217299/101208662	6	101209525/101216623/101202934/101203129/101222636/101207925
48	csv04144	Endocytosis	12/305	138/3927	0.384859	0.881968	101215599/101220522/101212793/101210925/101217929/101210094/101214261/101207637/101217735/101206370/101212682/101219958	LOC101215599/LOC101220522/LOC101212793/LOC101210925/LOC101217929/LOC101210094/LOC101214261/LOC101207637/LOC101217735/LOC101206370/LOC101212682/LOC101219958	csv:101215599/csv:101220522/csv:101212793/csv:101210925/csv:101217929/csv:101210094/csv:101214261/csv:101207637/csv:101217735/csv:101206370/csv:101212682/csv:101219958	12	3	101212793/101207637/101217735	9	101215599/101220522/101210925/101217929/101210094/101214261/101206370/101212682/101219958
49	csv00940	Phenylpropanoid biosynthesis	11/305	127/3927	0.398678	0.894992	101214916/101217543/101218856/101221151/101207100/101218361/101214838/101217567/101218077/101217781/101219029	LOC101214916/LOC101217543/LOC101218856/LOC101221151/LOC101207100/LOC101218361/LOC101214838/LOC101217567/LOC101218077/LOC101217781/LOC101219029	csv:101214916/csv:101217543/csv:101218617/csv:101221151/csv:101207100/csv:101218361/csv:101214838/csv:101217567/csv:101218077/csv:101217781/csv:101219029	11	2	101207100/101218077	9	101214916/101217543/101218856/101221151/101218361/101214838/101217567/101217781/101219029
50	csv00760	Nicotinate and nicotinamide metabolism	2/305	18/3927	0.413262	0.896477	101222585/101205815	LOC101222585/LOC101205815	csv:101222585/csv:101205815	2	1	101222585	1	101205815
51	csv04712	Circadian rhythm - plant	3/305	30/3927	0.415639	0.896477	101214341/101210765/101207969	LOC101214341/LOC101210765/LOC101207969	csv:101214341/csv:101210765/csv:101207969	3	1	101210765	2	101214341/101207969
52	csv00330	Arginine and proline metabolism	5/305	55/3927	0.426433	0.902071	101217299/101219166/101219569/101204792/101214819	LOC101217299/LOC101219166/LOC101219569/LOC101204792/LOC101214819	csv:101217299/csv:101219166/csv:101219569/csv:101204792/csv:101214819	5	4	101217299/101219166/101219569/101214819	1	101204792
53	csv00920	Sulfur metabolism	3/305	31/3927	0.436915	0.906806	101216623/101214065/101214714	LOC101216623/LOC101214065/LOC101214714	csv:101216623/csv:101214065/csv:101214714	3	1	101214714	2	101216623/101214065
54	csv04146	Peroxisome	6/305	70/3927	0.463799	0.925421	101207461/101202770/101212158/101216440/101217710/101216556	LOC101207461/LOC101202770/LOC101212158/LOC101216440/LOC101217710/LOC101216556	csv:101207461/csv:101202770/csv:101212158/csv:101216440/csv:101217710/csv:101216556	6	5	101207461/101212158/101216440/101217710/101216556	1	101202770
55	csv00280	Valine, leucine and isoleucine degradation	4/305	45/3927	0.467136	0.925421	101208662/101217710/101219569/101212707	LOC101208662/LOC101217710/LOC101219569/LOC101212707	csv:101208662/csv:101217710/csv:101219569/csv:101212707	4	4	101208662/101217710/101219569/101212707	0
56	csv00730	Thiamine metabolism	2/305	21/3927	0.493667	0.925421	101216714/101203230	LOC101216714/LOC101203230	csv:101216714/csv:101203230	2	1	101203230	1	101216714
57	csv00900	Terpenoid backbone biosynthesis	4/305	47/3927	0.501735	0.925421	101213470/101212295/101205649/101212707	LOC101213470/LOC101212295/LOC101205649/LOC101212707	csv:101213470/csv:101212295/csv:101205649/csv:101212707	4	3	101213470/101205649/101212707	1	101212295
58	csv00650	Butanoate metabolism	2/305	22/3927	0.51889	0.925421	101219660/101212707	LOC101219660/LOC101212707	csv:101219660/csv:101212707	2	1	101212707	1	101219660
59	csv00220	Arginine biosynthesis	3/305	36/3927	0.538116	0.925421	101217299/101213711/101215982	LOC101217299/LOC101213711/LOC101215982	csv:101217299/csv:101213711/csv:101215982	3	2	101217299/101215982	1	101213711
60	csv04145	Phagosome	5/305	63/3927	0.548264	0.925421	101204817/101221020/101218443/101208639/101217735	LOC101204817/LOC101221020/LOC101218443/LOC101208639/LOC101217735	csv:101204817/csv:101221020/csv:101218443/csv:101208639/csv:101217735	5	1	101217735	4	101204817/101221020/101218443/101208639
61	csv04130	SNARE interactions in vesicular transport	3/305	37/3927	0.557099	0.925421	101222163/101220775/101207624	LOC101222163/LOC101220775/LOC101207624	csv:101222163/csv:101220775/csv:101207624	3	1	101207624	2	101222163/101220775
62	csv00100	Steroid biosynthesis	2/305	24/3927	0.566767	0.925421	101220288/101210582	LOC101220288/LOC101210582	csv:101220288/csv:101210582	2	1	101220288	1	101210582
63	csv03022	Basal transcription factors	3/305	38/3927	0.575608	0.925421	101207693/101207528/101216807	LOC101207693/LOC101207528/LOC101216807	csv:101207693/csv:101207528/csv:101216807	3	2	101207693/101216807	1	101207528
64	csv00310	Lysine degradation	2/305	25/3927	0.589389	0.925421	101219569/101212707	LOC101219569/LOC101212707	csv:101219569/csv:101212707	2	2	101219569/101212707	0
65	csv00460	Cyanoamino acid metabolism	3/305	39/3927	0.593629	0.925421	101218064/101215910/101214838	LOC101218064/LOC101215910/LOC101214838	csv:101218064/csv:101215910/csv:101214838	3	1	101218064	2	101215910/101214838
66	csv00510	N-Glycan biosynthesis	3/305	40/3927	0.611148	0.925421	101215230/116401622/101222690	LOC101215230/LOC116401622/LOC101222690	csv:101215230/csv:101218297/csv:101222690	3	1	101215230	2	116401622/101222690
67	csv00905	Brassinosteroid biosynthesis	1/305	12/3927	0.621527	0.925421	101217830	LOC101217830	csv:101217830	1	1	101217830	0
68	csv01210	2-Oxocarboxylic acid metabolism	3/305	41/3927	0.628157	0.925421	101217299/101202770/101211790	LOC101217299/LOC101202770/LOC101211790	csv:101217299/csv:101202770/csv:101211790	3	2	101217299/101211790	1	101202770
69	csv00910	Nitrogen metabolism	2/305	27/3927	0.631972	0.925421	101215090/101205401	LOC101215090/LOC101205401	csv:101215090/csv:101205401	2	1	101215090	1	101205401
70	csv04626	Plant-pathogen interaction	10/305	138/3927	0.639571	0.925421	101207890/101208369/101217359/101221822/101216386/101203607/101218433/101206440/101218270/101207567	LOC101207890/LOC101208369/LOC101217359/LOC101221822/LOC101216386/LOC101203607/LOC101218433/LOC101206440/LOC101218270/LOC101207567	csv:101207890/csv:101208369/csv:101217359/csv:101221822/csv:101216389/csv:101203607/csv:101218433/csv:101206440/csv:101218270/csv:101207567	10	4	101208369/101216386/101206440/101218270	6	101207890/101217359/101221822/101203607/101218433/101207567
71	csv00400	Phenylalanine, tyrosine and tryptophan biosynthesis	3/305	42/3927	0.644648	0.925421	101207177/101217299/101213380	LOC101207177/LOC101217299/LOC101213380	csv:101207177/csv:101217299/csv:101213380	3	2	101217299/101213380	1	101207177
72	csv00945	Stilbenoid, diarylheptanoid and gingerol biosynthesis	1/305	13/3927	0.651012	0.925421	101207100	LOC101207100	csv:101207100	1	1	101207100	0
73	csv00564	Glycerophospholipid metabolism	6/305	86/3927	0.668534	0.925421	101220522/101220288/101207870/101207886/101220267/101221758	LOC101220522/LOC101220288/LOC101207870/LOC101207886/LOC101220267/LOC101221758	csv:101220522/csv:101220288/csv:101207870/csv:101207886/csv:101220267/csv:101221758	6	3	101220288/101207870/101207886	3	101220522/101220267/101221758
74	csv00710	Carbon fixation in photosynthetic organisms	4/305	58/3927	0.670613	0.925421	101217299/101208329/101219631/101215513	LOC101217299/LOC101208329/LOC101219631/LOC101215513	csv:101217299/csv:101208329/csv:101219631/csv:101215513	4	2	101217299/101219631	2	101208329/101215513
75	csv00053	Ascorbate and aldarate metabolism	3/305	44/3927	0.676064	0.925421	101203666/101203032/101219569	LOC101203666/LOC101203032/LOC101219569	csv:101203666/csv:101203032/csv:101219569	3	2	101203666/101219569	1	101203032
76	csv00590	Arachidonic acid metabolism	1/305	14/3927	0.678207	0.925421	101220288	LOC101220288	csv:101220288	1	1	101220288	0
77	csv00780	Biotin metabolism	1/305	14/3927	0.678207	0.925421	101221009	LOC101221009	csv:101221009	1	1	101221009	0
78	csv00630	Glyoxylate and dicarboxylate metabolism	4/305	59/3927	0.683848	0.925421	101220920/101215910/101212707/101214523	LOC101220920/LOC101215910/LOC101212707/LOC101214523	csv:101220920/csv:101215910/csv:101212707/csv:101214523	4	2	101212707/101214523	2	101220920/101215910
79	csv00513	Various types of N-glycan biosynthesis	2/305	30/3927	0.68928	0.925421	116401622/101211792	LOC116401622/LOC101211792	csv:101218297/csv:101211792	2	0		2	116401622/101211792
80	csv00130	Ubiquinone and other terpenoid-quinone biosynthesis	3/305	45/3927	0.690988	0.925421	101218602/101218361/101218077	LOC101218602/LOC101218361/LOC101218077	csv:101218602/csv:101218361/csv:101218077	3	2	101218602/101218077	1	101218361
81	csv00480	Glutathione metabolism	5/305	74/3927	0.692356	0.925421	101215771/101202770/101203666/101207634/101203032	LOC101215771/LOC101202770/LOC101203666/LOC101207634/LOC101203032	csv:101215538/csv:101202770/csv:101203666/csv:101207634/csv:101203032	5	3	101215771/101203666/101207634	2	101202770/101203032
82	csv00531	Glycosaminoglycan degradation	1/305	15/3927	0.70329	0.925421	101211792	LOC101211792	csv:101211792	1	0		1	101211792
83	csv00970	Aminoacyl-tRNA biosynthesis	3/305	46/3927	0.70539	0.925421	116406013/101210547/101211723	LOC116406013/LOC101210547/LOC101211723	csv:101220233/csv:101210547/csv:101211723	3	1	101210547	2	116406013/101211723
84	csv00770	Pantothenate and CoA biosynthesis	2/305	31/3927	0.706685	0.925421	101202899/101219569	LOC101202899/LOC101219569	csv:101202899/csv:101219569	2	2	101202899/101219569	0
85	csv00670	One carbon pool by folate	1/305	16/3927	0.726423	0.940076	101215910	LOC101215910	csv:101215910	1	0		1	101215910
86	csv00340	Histidine metabolism	1/305	17/3927	0.747758	0.955071	101219569	LOC101219569	csv:101219569	1	1	101219569	0
87	csv03008	Ribosome biogenesis in eukaryotes	4/305	65/3927	0.755374	0.955071	101222880/101220274/101222795/101214103	LOC101222880/LOC101220274/LOC101222795/LOC101214103	csv:101222880/csv:101220274/csv:101222795/csv:101214103	4	1	101220274	3	101222880/101222795/101214103
88	csv01040	Biosynthesis of unsaturated fatty acids	1/305	18/3927	0.767434	0.959292	101217710	LOC101217710	csv:101217710	1	1	101217710	0
89	csv03040	Spliceosome	9/305	143/3927	0.793042	0.980164	101215599/116405819/101206291/101210925/101210094/101210036/101206387/101208928/101221685	LOC101215599/LOC116405819/LOC101206291/LOC101210925/LOC101210094/LOC101210036/LOC101206387/LOC101208928/LOC101221685	csv:101215599/csv:101203558/csv:101206291/csv:101210925/csv:101210094/csv:101210036/csv:101206387/csv:101208928/csv:101221685	9	4	101206291/101210036/101206387/101208928	5	101215599/116405819/101210925/101210094/101221685
90	csv00908	Zeatin biosynthesis	1/305	20/3927	0.802314	0.980606	101218917	LOC101218917	csv:101218917	1	0		1	101218917
91	csv03020	RNA polymerase	2/305	40/3927	0.829341	0.993144	101216823/101213105	LOC101216823/LOC101213105	csv:101216823/csv:101213105	2	1	101216823	1	101213105
92	csv00904	Diterpenoid biosynthesis	1/305	22/3927	0.831978	0.993144	101212803	LOC101212803	csv:101212803	1	1	101212803	0
93	csv03060	Protein export	2/305	41/3927	0.839658	0.993144	101207505/101209193	LOC101207505/LOC101209193	csv:101207505/csv:101209193	2	1	101209193	1	101207505
94	csv00860	Porphyrin and chlorophyll metabolism	2/305	44/3927	0.867311	0.998351	101203653/101218189	LOC101203653/DVR	csv:101203653/csv:101218189	2	0		2	101203653/101218189
95	csv00030	Pentose phosphate pathway	2/305	45/3927	0.875512	0.998351	101215219/101202739	LOC101215219/LOC101202739	csv:101215219/csv:101202739	2	0		2	101215219/101202739
96	csv00790	Folate biosynthesis	1/305	26/3927	0.878651	0.998351	101209617	LOC101209617	csv:101209617	1	1	101209617	0
97	csv03018	RNA degradation	4/305	81/3927	0.885498	0.998351	116405819/101210207/101217516/101202739	LOC116405819/LOC101210207/LOC101217516/LOC101202739	csv:101203558/csv:101210207/csv:101217516/csv:101202739	4	0		4	116405819/101210207/101217516/101202739
98	csv03420	Nucleotide excision repair	2/305	51/3927	0.915663	0.998351	101219981/101208568	LOC101219981/LOC101208568	csv:101219981/csv:101208568	2	1	101219981	1	101208568
99	csv03430	Mismatch repair	1/305	31/3927	0.919247	0.998351	101219981	LOC101219981	csv:101219981	1	1	101219981	0
100	csv04070	Phosphatidylinositol signaling system	2/305	54/3927	0.930848	0.998351	101209542/101219958	LOC101209542/LOC101219958	csv:101209542/csv:101219958	2	0		2	101209542/101219958
101	csv00906	Carotenoid biosynthesis	1/305	33/3927	0.931397	0.998351	101204961	LOC101204961	csv:101204961	1	0		1	101204961
102	csv03410	Base excision repair	1/305	34/3927	0.93677	0.998351	101208568	LOC101208568	csv:101208568	1	0		1	101208568
103	csv00640	Propanoate metabolism	1/305	35/3927	0.941724	0.998351	101212707	LOC101212707	csv:101212707	1	1	101212707	0
104	csv00562	Inositol phosphate metabolism	2/305	64/3927	0.964868	0.998351	101209542/101219958	LOC101209542/LOC101219958	csv:101209542/csv:101219958	2	0		2	101209542/101219958
105	csv00240	Pyrimidine metabolism	1/305	45/3927	0.974258	0.998351	101202899	LOC101202899	csv:101202899	1	1	101202899	0
106	csv03015	mRNA surveillance pathway	3/305	92/3927	0.978481	0.998351	101217340/101206275/101222391	LOC101217340/LOC101206275/LOC101222391	csv:101217340/csv:101206275/csv:101222391	3	1	101217340	2	101206275/101222391
107	csv00190	Oxidative phosphorylation	4/305	120/3927	0.986987	0.998351	101213505/11123919/101205555/101208633	LOC101213505/nad5/LOC101205555/LOC101208633	csv:101213505/csv:11123919/csv:101205555/csv:101208633	4	3	101213505/11123919/101208633	1	101205555
108	csv03013	RNA transport	4/305	130/3927	0.992934	0.998351	116403970/101219651/101214334/101220274	LOC116403970/LOC101219651/LOC101214334/LOC101220274	csv:101220434/csv:101219651/csv:101214334/csv:101220274	4	4	116403970/101219651/101214334/101220274	0
109	csv00195	Photosynthesis	1/305	68/3927	0.996102	0.998351	101205803	LOC101205803	csv:105434451	1	0		1	101205803
110	csv03010	Ribosome	9/305	251/3927	0.998351	0.998351	101219899/101212288/3429308/101210000/101207012/101204269/101208580/101220973/101206444	LOC101219899/LOC101212288/rps14/LOC101210000/LOC101207012/LOC101204269/LOC101208580/LOC101220973/LOC101206444	csv:101219899/csv:101212288/csv:3429308/csv:101210000/csv:101207012/csv:101204269/csv:101208580/csv:101220973/csv:101206444	9	1	3429308	8	101219899/101212288/101210000/101207012/101204269/101208580/101220973/101206444
