# Supplementary figures and images for: Identification of Key Genes during Ethylene-Induced Adventitious Root Development in Cucumber (Cucumis sativus L.)
Source: MDPI journal article supplement (doi:10.3390/ijms232112981), 2022-10-26

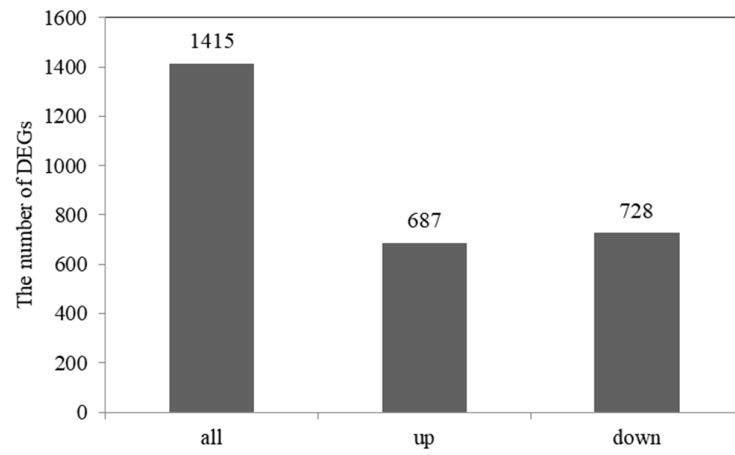

**Supplementary Figure S2.** Analysis numbers of DEGs.

Supplement: s1 [file s1]

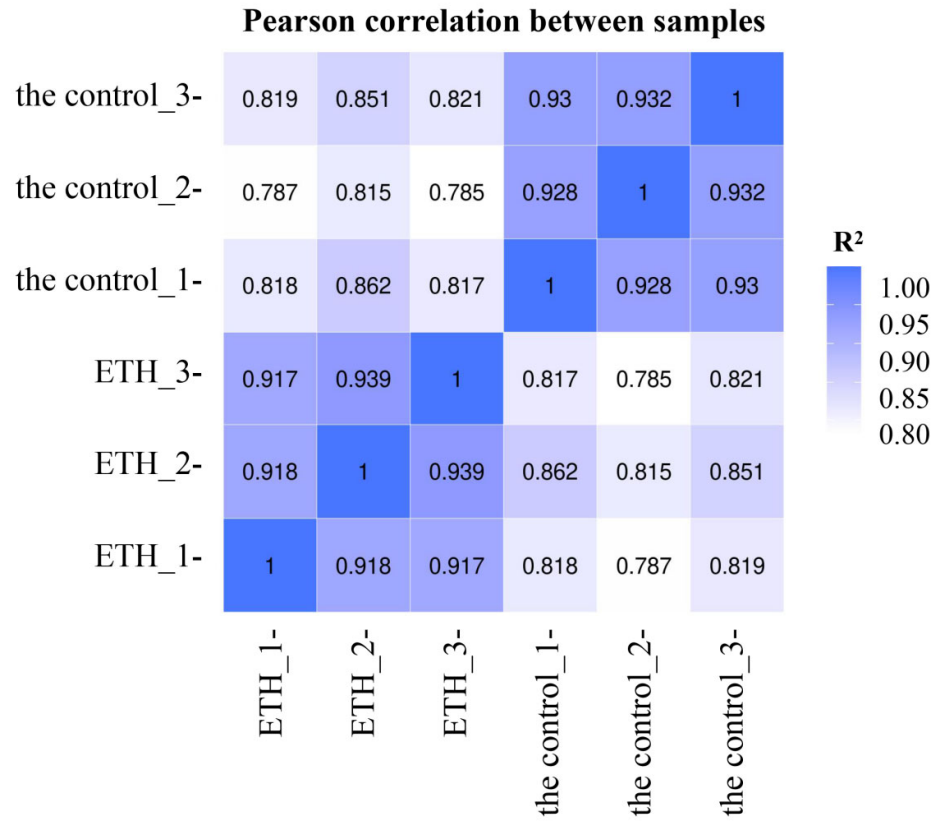

**Supplementary Figure S1.** Heat map of Pearson correlation between samples.

Supplement: s1 [file s1]
